# Supplementary material for: Rates of Physician Coprescribing of Opioids and Benzodiazepines After the Release of the Centers for Disease Control and Prevention Guidelines in 2016
Source: PubMed Central journal article supplement (PMC6681551; doi:10.1001/jamanetworkopen.2019.8325), 2019-08-02
Supplement: jamanetwopen-2-e198325-s001.pdf [file jamanetwopen-2-e198325-s001.pdf]

## Supplementary Online Content

Jeffery MM, Hooten WM, Jena AB, Ross JS, Shah ND, Karaca-Mandic P. Rates of physician coprescribing of opioids and benzodiazepines after the release of the Centers for Disease Control and Prevention guidelines in 2016. *JAMA Netw Open*. 2019;2(8):e198325. doi:10.1001/jamanetworkopen.2019.8325

**eAppendix 1.** Identification of Opioids and Conversion to Morphine Milligram Equivalents

**eAppendix 2.** Details of the Statistical Analysis Methodology

**eAppendix 3.** Elixhauser Comorbidity Calculations

**eAppendix 4.** Cancer

**eAppendix 5.** Sickle Cell Disease

**eAppendix 6.** Hospice

**eTable 1.** Opioid Drugs and Combinations Included

**eTable 2.** Regression Results: Extent of Coprescribing for the Commercially Insured—Short-term Opioid Use Episodes

**eTable 3.** Regression Results: Extent of Coprescribing for the Commercially Insured—Long-term Opioid Use Episodes

**eTable 4.** Regression Results: Extent of Coprescribing for Medicare Advantage—Short-term Episodes

**eTable 5.** Regression Results: Extent of Coprescribing for Medicare Advantage—Long-term Episodes

**eTable 6.** Adjusted Estimates: Extent and Intensity of Coprescription

**eTable 7.** Regression results: Intensity of Coprescribing for the Commercially Insured—Short-term Episodes

**eTable 8.** Regression Results: Intensity of Coprescribing for the Commercially Insured—Long-term Episodes

**eTable 9.** Regression Results: Intensity of Coprescribing for Medicare Advantage—Short-term Episodes

**eTable 10.** Regression Results: Intensity of Coprescribing for Medicare Advantage— Long-term Episodes

**eTable 11.** Regression Results: Intensity of Coprescription Among Commercial Beneficiaries With and Without Same Physician Prescribing Opioids and Benzodiazepines—Short-term Opioid Use Episodes

**eTable 12.** Regression Results: Intensity of Coprescription Among Commercial Beneficiaries With and Without Same Physician Prescribing Opioids and Benzodiazepines: Long-term Opioid Use Episodes

**eTable 13.** Regression Results: Intensity of Coprescription Among Medicare Advantage Beneficiaries With and Without Same Physician Prescribing Opioids and Benzodiazepines—Short-term Episodes

**eTable 14.** Regression Results: Intensity of Coprescription Among Medicare Advantage Beneficiaries With and Without Same Physician Prescribing Opioids and Benzodiazepines—Long-term Episodes

**eTable 15.** Intensity of Coprescribing Before and After the Guideline Release: Comparing Same Physician Prescribing to Different Physicians Prescribing Opioids and Benzodiazepines

**eTable 16.** Extent of Coprescription by Race/Ethnicity: Adjusted Percent of Overlapping Opioids and BZDs in Month

**eTable 17.** Changes in Extent of Opioid and Benzodiazepine Coprescribing Associated With CDC Guideline Release, by Race/Ethnicity

**eTable 18.** Regression Results Secondary Analysis: Race/Ethnicity Short-term Episodes

**eTable 19.** Regression Results Secondary Analysis: Race/Ethnicity Long-term Episodes

**eTable 20.** Extent of Coprescription by Opioid Dose: Adjusted Percent With Overlapping Opioids and Benzodiazepines in Month

**eTable 21.** Changes in Extent of Opioid and Benzodiazepine Coprescribing Associated With CDC Guideline Release, by Opioid Dose

**eTable 22.** Regression Results Sensitivity Analysis: Episodes Starting Before vs After Guideline Release

**eTable 23.** Adjusted Coprescribing Extent Estimates and Trends in Long-term Opioid Use Episodes Starting Before vs After the Guidelines Were Released

**eFigure 1.** Cohort Flow Chart Describing Construction of the Study Sample

**eFigure 2.** Race/Ethnicity: Coprescribing Extent

**eFigure 3.** Coprescribing Extent by Opioid Dose

**eReferences**

This supplementary material has been provided by the authors to give readers additional information about their work.

## **eAppendix 1. Identification of Opioids and Conversion to Morphine Milligram Equivalents**

We identified all opioid drugs present in the table of NDC codes in OptumLabs Data Warehouse. For the purposes of this analysis, we classified tramadol as an opioid. To limit the sample to drugs intended for home use, we excluded any injected or infused drug—those for which the dosage form was vial, syringe, ampule, cartridge, IV solution, etc. We included only drugs which had a defined dose unit like a tablet, pill, mg/mL, etc. This excludes drugs in powder or bulk form. We included both single drug formulations and combinations of drugs. eTable 1 includes all opioid drug combinations found in the table of NDC codes. Both long-acting and short-acting formulations were included. Conversion factors were taken from the CDC compilation.<sup>1</sup>

## **eAppendix 2. Details of the Statistical Analysis Methodology**

Changes in coprescribing were analyzed both as a one-time change in level at the time of CDC guideline release and as a change in trend after the guideline release. To implement this approach, piecewise regression with a single knot spline was used and three main exposure variables were created. The variables *PreRelease* and *Release* were components of a spline with a knot at the release of the guidelines (March 2016). *PreRelease* measured the trend in the outcome variable before the intervention, while *Release* captured the change in trend after the intervention. *AfterRelease* was an indicator for time after March 2016. This indicator was used to measure the change in level of the outcome variable from just before to just after the guidelines release.

The unit of observation for the analysis of the extent of coprescription was a person-month during which the beneficiary had opioids available for at least one day; the unit of observation for the analysis of the intensity of coprescription was a person-month during which

the beneficiary had at least one day of overlapping opioids and benzodiazepines.. A generalized linear model was specified with clustered standard errors to account for repeated observations on the same patients. The model was adjusted for beneficiary covariates age, sex, race/ethnicity, state of residence, and a series of indicator variables for each of the Elixhauser comorbidities<sup>2</sup> measured on a rolling 6 month basis. A logit specification was used to assess the extent of coprescription, while a negative binomial specification was used to assess intensity of coprescription. In the latter model, the natural log of the number of opioid days was included with the coefficient constrained to 1 to allow interpretation of the incidence rates as the proportion of overlapping days of opioids and benzodiazepines. In the main analyses of intensity and extent of coprescribing, separate models were estimated for the two beneficiary insurance populations (commercial and MA) and two types of opioid use episodes (long-term and short-term). For the subanalysis of coprescribing extent by race and ethnicity, commercial and MA populations were modeled together, with a binary variable indicating population added to the model.

In a sensitivity analysis, coprescribing by the same physician was further explored in comparison to one physician prescribing the benzodiazepine and another prescribing the opioid. This specification included interactions of the three main exposure variables with a categorical variable measuring whether the same physician prescribed the opioids and benzodiazepines; this model was limited to person-months with any overlap days. The categorical variable could take the following values; (1) at least one day of overlap with prescriptions written by different physicians; (2) at least one day of overlap with prescriptions written by the same physician; (3) at least one day of overlap, but it was not possible to assess whether the same physician prescribed the drugs because of unknown prescriber identification numbers on one or both of the

prescriptions. Some beneficiaries had multiple opioid and multiple benzodiazepine prescriptions available in the same month. In those cases, if there was at least one pair of overlapping opioid and benzodiazepine prescriptions from the same physician, the categorical variable was set to “same physician.” A truncated negative binomial model was used because the outcome distribution could not take the value 0.

A post-hoc sensitivity analysis was specified to assess initiation of benzodiazepines in the first 90 days of new long-term opioid use episodes that began before the guideline release versus those that began after the guideline release. Separate models were specified for commercial and Medicare Advantage populations.

The Holm sequentially rejective multiple test procedure was used to control the family-wise error rate at 0.05.<sup>3</sup> Tables, text, and figures denote with asterisks whether comparisons are statistically significant after this adjustment. For the purpose of controlling the error rates, the analyses of extent and intensity of coprescribing were treated as a single family of analyses, as were the analyses of same physician prescribing, the analyses by race and ethnicity, and the analyses of long-term episodes beginning before and after the guideline release.

Summary statistics are presented as percent and standard error (SE) for categorical variables, and as median and interquartile range (IQR, 25<sup>th</sup> percentile, 75<sup>th</sup> percentile) for continuous variables.

Complete regression results are available in the Supplementary Appendix Tables S3-S7 and S14 along with further detail on model specifications. Figures present adjusted rates of overlapping opioid and benzodiazepine fills, and adjusted proportion of opioid days where benzodiazepines were also available (overlap days), with 95 confidence intervals in tables;

unadjusted values are plotted along with lines representing the adjusted rates. All analyses were performed with Stata/MP version 15.0.<sup>4</sup>

### **eAppendix 3. Elixhauser Comorbidity Calculations**

ICD 9 and 10 codes from Quan et al.<sup>2</sup> were used to define the Elixhauser comorbidities. We created flags for the presence of at least one inpatient or two outpatient dates of service with a diagnosis from the Elixhauser definitions. Flags were created for each month, looking back at the prior 6 months of health care service use. The flags were set to 1 if the definition was met, or 0 if it was not. A separate flag was created to indicate whether the beneficiary had not had 6 prior months of coverage and was included separately in the models.

### **eAppendix 4. Cancer**

To exclude beneficiaries with cancer, we looked for at least 2 evaluation and management procedure codes on different dates of service where one of the first 4 diagnoses on the claim was a cancer diagnosis. An opioid episode was excluded if the beneficiary had at least 2 cancer evaluation and management claims during the period from 3 months before the start of the episode through the end of the episode. The codes used to define cancer for the purpose of excluding opioid use episodes were ICD9 codes 140 through 209, ICD9 codes 230 through 239, ICD10 codes C00 through C97, ICD10 codes D00 through D09, and ICD10 codes D37 through D47.

### **eAppendix 5. Sickle Cell Disease**

To exclude beneficiaries with sickle cell disease, we used the same procedure as used to exclude episodes for cancer. The codes used to define sickle cell disease were ICD9 codes 282.41, 282.42, 282.6x;<sup>5</sup> and ICD10 codes D570.x, D571.x, D574.x, and D578.x.

## eAppendix 6. Hospice

We excluded any opioid use episode with one or more hospice procedure or revenue codes during the period from 3 months before the start of the episode through the end of the episode. Hospice procedure codes were 99377, 99378, G0182, G0337, G9474-G9479, G9524, Q5001-Q5010, S0255, S9126, and T2042-T2046. Hospice revenue codes were 0115, 0125, 0135, 0145, 0155, 0235, and 065x.

eTable 1. Opioid Drugs and Combinations Included

| Opioid                | Drug combinations included             | Long acting | Short acting | Conversion factor*          |
|-----------------------|----------------------------------------|-------------|--------------|-----------------------------|
| <b>Buprenorphine</b>  | Buprenorphine                          | X           |              | 10<br>Patch version: 12.6   |
|                       | Buprenorphine/Naloxone                 | X           |              | 10                          |
| <b>Butorphanol</b>    | Butorphanol                            |             | X            | 7                           |
| <b>Codeine</b>        | Codeine                                |             | X            | 0.15                        |
|                       | Codeine/Acetaminophen                  |             | X            | 0.15                        |
|                       | Codeine/Acetaminophen/ Butabarbital    |             | X            | 0.15                        |
|                       | Codeine/Acetaminophen/ Butalbital      |             | X            | 0.15                        |
|                       | Codeine/Aspirin                        |             | X            | 0.15                        |
|                       | Codeine/Aspirin/Butalbital/ Caffeine   |             | X            | 0.15                        |
|                       | Codeine/Aspirin/Carisoprodol           |             | X            | 0.15                        |
|                       | Codeine/Aspirin/Phenacetin/ Caffeine   |             | X            | 0.15                        |
| <b>Dihydrocodeine</b> | Dihydrocodeine/Acetaminophen/ Caffeine |             | X            | 0.25                        |
|                       | Dihydrocodeine/Aspirin/Caffeine        |             | X            | 0.25                        |
| <b>Fentanyl</b>       | Fentanyl                               | X           | X            | LA: 0.72<br>SA: 0.13 - 0.18 |
| <b>Hydrocodone</b>    | Hydrocodone                            | X           | X            | 1                           |
|                       | Hydrocodone/Acetaminophen              |             | X            | 1                           |
|                       | Hydrocodone/Acetaminophen/Diet.Sup.11  |             | X            | 1                           |
|                       | Hydrocodone/Aspirin                    |             | X            | 1                           |
|                       | Hydrocodone/Ibuprofen                  |             | X            | 1                           |
| <b>Hydromorphone</b>  | Hydromorphone                          | X           | X            | 4                           |
| <b>Levomethadyl</b>   | Levomethadyl                           | X           |              | 8                           |
| <b>Levorphanol</b>    | Levorphanol                            | X           |              | 11                          |
| <b>Meperidine</b>     | Meperidine/Acetaminophen               |             | X            | 0.1                         |
|                       | Meperidine/Promethazine                |             | X            | 0.1                         |
| <b>Methadone</b>      | Methadone                              | X           |              | 3                           |

| Opioid             | Drug combinations included         | Long acting | Short acting | Conversion factor* |
|--------------------|------------------------------------|-------------|--------------|--------------------|
| <b>Morphine</b>    | Morphine Sulfate                   | X           | X            | 1                  |
|                    | Morphine Sulfate/Naltrexone        | X           |              | 1                  |
| <b>Opium</b>       | Opium                              |             | X            | 1                  |
|                    | Opium/Belladonna                   |             | X            | 1                  |
| <b>Oxycodone</b>   | Oxycodone                          | X           | X            | 1.5                |
|                    | Oxycodone/Acetaminophen            |             | X            | 1.5                |
|                    | Oxycodone/Aspirin                  |             | X            | 1.5                |
|                    | Oxycodone/Ibuprofen                |             | X            | 1.5                |
| <b>Oxymorphone</b> | Oxymorphone                        | X           | X            | 3                  |
| <b>Pentazocine</b> | Pentazocine/Acetaminophen          |             | X            | 0.37               |
|                    | Pentazocine/Aspirin                |             | X            | 0.37               |
|                    | Pentazocine/Naloxone               |             | X            | 0.37               |
| <b>Tapentadol</b>  | Tapentadol                         | X           | X            | 0.4                |
| <b>Tramadol</b>    | Tramadol                           | X           | X            | 0.1                |
|                    | Tramadol/Acetaminophen             |             | X            | 0.1                |
|                    | Tramadol/Dietary Supplement No. 11 |             | X            | 0.1                |

\* Factor used to convert mg of drug to mg of morphine equivalents<sup>1</sup>



eTable 2. Regression Results: Extent of Coprescribing for the Commercially Insured—Short-term Opioid Use Episodes

| Outcome: any overlap days<br>Population: commercial,<br>short-term episodes | Coef.  | Robust<br>Std. Err. | z      | P>z   | [95 Conf. | Interval] |
|-----------------------------------------------------------------------------|--------|---------------------|--------|-------|-----------|-----------|
| Spline components                                                           |        |                     |        |       |           |           |
| months before release                                                       | 0.002  | 0.000               | 6.540  | 0.000 | 0.001     | 0.003     |
| months after release                                                        | -0.003 | 0.001               | -4.980 | 0.000 | -0.004    | -0.002    |
| binary post-release                                                         | -0.032 | 0.007               | -4.830 | 0.000 | -0.044    | -0.019    |
| state                                                                       |        |                     |        |       |           |           |
| AL                                                                          | -0.003 | 0.099               | -0.030 | 0.974 | -0.197    | 0.190     |
| AR                                                                          | 0.098  | 0.098               | 1.010  | 0.315 | -0.094    | 0.291     |
| AZ                                                                          | -0.081 | 0.097               | -0.840 | 0.402 | -0.270    | 0.108     |
| CA                                                                          | -0.032 | 0.096               | -0.330 | 0.741 | -0.221    | 0.157     |
| CO                                                                          | -0.029 | 0.096               | -0.300 | 0.763 | -0.218    | 0.160     |
| CT                                                                          | 0.042  | 0.100               | 0.420  | 0.671 | -0.153    | 0.237     |
| DC                                                                          | -0.219 | 0.107               | -2.050 | 0.040 | -0.428    | -0.010    |
| DE                                                                          | -0.163 | 0.122               | -1.340 | 0.181 | -0.402    | 0.076     |
| FL                                                                          | 0.156  | 0.096               | 1.630  | 0.104 | -0.032    | 0.345     |
| GA                                                                          | -0.100 | 0.097               | -1.030 | 0.301 | -0.289    | 0.089     |
| HI                                                                          | -0.570 | 0.208               | -2.740 | 0.006 | -0.979    | -0.162    |
| IA                                                                          | -0.286 | 0.098               | -2.920 | 0.003 | -0.478    | -0.094    |
| ID                                                                          | -0.356 | 0.108               | -3.310 | 0.001 | -0.567    | -0.145    |
| IL                                                                          | -0.133 | 0.097               | -1.370 | 0.169 | -0.322    | 0.057     |
| IN                                                                          | -0.291 | 0.097               | -2.990 | 0.003 | -0.481    | -0.100    |
| KS                                                                          | -0.233 | 0.099               | -2.360 | 0.018 | -0.427    | -0.040    |
| KY                                                                          | -0.390 | 0.100               | -3.910 | 0.000 | -0.585    | -0.194    |
| LA                                                                          | 0.188  | 0.097               | 1.940  | 0.052 | -0.002    | 0.377     |
| MA                                                                          | -0.076 | 0.099               | -0.760 | 0.445 | -0.270    | 0.118     |
| MD                                                                          | -0.226 | 0.097               | -2.330 | 0.020 | -0.416    | -0.036    |
| ME                                                                          | -0.305 | 0.122               | -2.500 | 0.012 | -0.544    | -0.066    |
| MI                                                                          | -0.013 | 0.098               | -0.130 | 0.893 | -0.205    | 0.179     |

| Outcome: any overlap days<br>Population: commercial,<br>short-term episodes | Coef.  | Robust<br>Std. Err. | z      | P>z   | [95 Conf. | Interval] |
|-----------------------------------------------------------------------------|--------|---------------------|--------|-------|-----------|-----------|
| MN                                                                          | -0.652 | 0.097               | -6.700 | 0.000 | -0.842    | -0.461    |
| MO                                                                          | -0.087 | 0.097               | -0.900 | 0.371 | -0.276    | 0.103     |
| MS                                                                          | -0.151 | 0.098               | -1.540 | 0.125 | -0.343    | 0.042     |
| MT                                                                          | -0.398 | 0.124               | -3.200 | 0.001 | -0.642    | -0.154    |
| NC                                                                          | 0.078  | 0.097               | 0.810  | 0.421 | -0.111    | 0.267     |
| ND                                                                          | -0.450 | 0.114               | -3.940 | 0.000 | -0.673    | -0.226    |
| NE                                                                          | -0.298 | 0.098               | -3.040 | 0.002 | -0.490    | -0.106    |
| NH                                                                          | 0.068  | 0.106               | 0.640  | 0.521 | -0.140    | 0.277     |
| NJ                                                                          | -0.048 | 0.098               | -0.490 | 0.624 | -0.239    | 0.144     |
| NM                                                                          | -0.261 | 0.102               | -2.550 | 0.011 | -0.461    | -0.061    |
| NV                                                                          | 0.105  | 0.100               | 1.060  | 0.291 | -0.090    | 0.301     |
| NY                                                                          | -0.201 | 0.097               | -2.070 | 0.039 | -0.392    | -0.010    |
| OH                                                                          | -0.384 | 0.097               | -3.970 | 0.000 | -0.573    | -0.195    |
| OK                                                                          | -0.222 | 0.098               | -2.270 | 0.023 | -0.413    | -0.031    |
| OR                                                                          | -0.359 | 0.099               | -3.640 | 0.000 | -0.552    | -0.166    |
| PA                                                                          | -0.139 | 0.098               | -1.420 | 0.155 | -0.330    | 0.052     |
| RI                                                                          | 0.024  | 0.101               | 0.240  | 0.811 | -0.174    | 0.222     |
| SC                                                                          | 0.161  | 0.098               | 1.630  | 0.103 | -0.032    | 0.353     |
| SD                                                                          | -0.434 | 0.130               | -3.340 | 0.001 | -0.689    | -0.179    |
| TN                                                                          | -0.169 | 0.097               | -1.730 | 0.083 | -0.359    | 0.022     |
| TX                                                                          | -0.104 | 0.096               | -1.080 | 0.279 | -0.292    | 0.084     |
| UT                                                                          | -0.177 | 0.098               | -1.810 | 0.071 | -0.369    | 0.015     |
| VA                                                                          | -0.102 | 0.097               | -1.050 | 0.293 | -0.292    | 0.088     |
| VT                                                                          | -0.108 | 0.168               | -0.640 | 0.521 | -0.438    | 0.222     |
| WA                                                                          | -0.334 | 0.098               | -3.420 | 0.001 | -0.526    | -0.143    |
| WI                                                                          | -0.285 | 0.097               | -2.940 | 0.003 | -0.474    | -0.095    |
| WV                                                                          | -0.167 | 0.109               | -1.530 | 0.125 | -0.381    | 0.046     |
| WY                                                                          | -0.433 | 0.117               | -3.700 | 0.000 | -0.662    | -0.203    |
| Unknown/other                                                               | -0.086 | 0.102               | -0.850 | 0.398 | -0.287    | 0.114     |
|                                                                             |        |                     |        |       |           |           |
| race/ethnicity                                                              |        |                     |        |       |           |           |

| Outcome: any overlap days<br>Population: commercial,<br>short-term episodes | Coef.  | Robust<br>Std. Err. | z       | P>z   | [95 Conf. | Interval] |
|-----------------------------------------------------------------------------|--------|---------------------|---------|-------|-----------|-----------|
| B                                                                           | -0.467 | 0.009               | -54.290 | 0.000 | -0.484    | -0.450    |
| H                                                                           | -0.383 | 0.008               | -47.900 | 0.000 | -0.399    | -0.367    |
| A                                                                           | -0.633 | 0.015               | -41.770 | 0.000 | -0.662    | -0.603    |
| U                                                                           | -0.096 | 0.011               | -8.400  | 0.000 | -0.118    | -0.073    |
|                                                                             |        |                     |         |       |           |           |
| elix_chf                                                                    | -0.023 | 0.026               | -0.900  | 0.366 | -0.074    | 0.027     |
| elix_arrhythmia                                                             | 0.107  | 0.015               | 7.190   | 0.000 | 0.078     | 0.137     |
| elix_valvular                                                               | -0.045 | 0.025               | -1.810  | 0.070 | -0.095    | 0.004     |
| elix_pulm_circ                                                              | 0.017  | 0.035               | 0.500   | 0.619 | -0.051    | 0.085     |
| elix_periph_vasc                                                            | 0.006  | 0.026               | 0.240   | 0.807 | -0.045    | 0.058     |
| elix_htn_uncomp                                                             | 0.142  | 0.007               | 20.970  | 0.000 | 0.129     | 0.156     |
| elix_htn_comp                                                               | 0.035  | 0.029               | 1.210   | 0.227 | -0.022    | 0.092     |
| elix_oth_neuro                                                              | 0.534  | 0.020               | 27.020  | 0.000 | 0.495     | 0.572     |
| elix_chron_pulm                                                             | 0.300  | 0.011               | 26.530  | 0.000 | 0.278     | 0.322     |
| elix_pep_ulcer                                                              | 0.192  | 0.057               | 3.400   | 0.001 | 0.081     | 0.303     |
| elix_dm_wo_cc                                                               | -0.107 | 0.011               | -9.770  | 0.000 | -0.129    | -0.086    |
| elix_dm_w_cc                                                                | -0.122 | 0.017               | -7.210  | 0.000 | -0.156    | -0.089    |
| elix_paralysis                                                              | 0.167  | 0.051               | 3.290   | 0.001 | 0.067     | 0.266     |
| elix_renal                                                                  | -0.118 | 0.027               | -4.350  | 0.000 | -0.172    | -0.065    |
| elix_solid_tumor_wo_mets                                                    | 0.079  | 0.022               | 3.600   | 0.000 | 0.036     | 0.122     |
| elix_liver                                                                  | 0.068  | 0.023               | 3.000   | 0.003 | 0.024     | 0.113     |
| elix_met_cancer                                                             | 0.000  | 0.085               | 0.000   | 0.997 | -0.167    | 0.167     |
| elix_hiv_aids                                                               | 0.614  | 0.049               | 12.550  | 0.000 | 0.518     | 0.710     |
| elix_rheum_arth_coll                                                        | 0.136  | 0.017               | 8.010   | 0.000 | 0.103     | 0.170     |
| elix_hypothyroid                                                            | 0.166  | 0.012               | 14.390  | 0.000 | 0.144     | 0.189     |
| elix_lymphoma                                                               | 0.198  | 0.073               | 2.710   | 0.007 | 0.055     | 0.341     |
| elix_coagulopathy                                                           | -0.078 | 0.029               | -2.670  | 0.008 | -0.135    | -0.021    |
| elix_obesity                                                                | -0.144 | 0.012               | -12.050 | 0.000 | -0.168    | -0.121    |
| elix_weight_loss                                                            | 0.212  | 0.034               | 6.190   | 0.000 | 0.145     | 0.279     |
| elix_fluid_electrolyte                                                      | 0.125  | 0.016               | 7.630   | 0.000 | 0.093     | 0.157     |
| elix_blood_loss_anemia                                                      | -0.227 | 0.049               | -4.680  | 0.000 | -0.322    | -0.132    |

| Outcome: any overlap days<br>Population: commercial,<br>short-term episodes | Coef.  | Robust<br>Std. Err. | z       | P>z   | [95 Conf. | Interval] |
|-----------------------------------------------------------------------------|--------|---------------------|---------|-------|-----------|-----------|
| elix_deficiency_anemia                                                      | 0.106  | 0.025               | 4.220   | 0.000 | 0.056     | 0.155     |
| elix_alcohol                                                                | 0.142  | 0.026               | 5.500   | 0.000 | 0.092     | 0.193     |
| elix_drug_abuse                                                             | 0.518  | 0.027               | 19.370  | 0.000 | 0.466     | 0.571     |
| elix_psychosis                                                              | 0.649  | 0.039               | 16.580  | 0.000 | 0.573     | 0.726     |
| elix_depression                                                             | 1.319  | 0.008               | 169.150 | 0.000 | 1.303     | 1.334     |
| less than 6 months prior<br>insurance coverage                              | 0.005  | 0.005               | 0.900   | 0.367 | -0.006    | 0.015     |
|                                                                             |        |                     |         |       |           |           |
| female                                                                      | 0.435  | 0.005               | 91.930  | 0.000 | 0.426     | 0.445     |
| age                                                                         | 0.018  | 0.000               | 107.230 | 0.000 | 0.017     | 0.018     |
| _cons                                                                       | -4.585 | 0.222               | -20.680 | 0.000 | -5.020    | -4.151    |

Observations: 6,485,891 person-months contributed by 3,564,678 individuals

eTable 3. Regression Results: Extent of Coprescribing for the Commercially Insured—Long-term Opioid Use Episodes

| Outcome: any overlap days<br>Population: commercial,<br>long-term episodes | Coef.  | Robust<br>Std. Err. | z      | P>z   | [95 Conf. | Interval] |
|----------------------------------------------------------------------------|--------|---------------------|--------|-------|-----------|-----------|
|                                                                            |        |                     |        |       |           |           |
| Spline components                                                          |        |                     |        |       |           |           |
| months before release                                                      | 0.003  | 0.001               | 2.010  | 0.044 | 0.000     | 0.005     |
| months after release                                                       | -0.007 | 0.002               | -3.780 | 0.000 | -0.011    | -0.004    |
| binary post-release                                                        | 0.051  | 0.017               | 2.950  | 0.003 | 0.017     | 0.085     |
|                                                                            |        |                     |        |       |           |           |
| state                                                                      |        |                     |        |       |           |           |
| AL                                                                         | 0.968  | 0.469               | 2.060  | 0.039 | 0.048     | 1.887     |
| AR                                                                         | 0.870  | 0.469               | 1.850  | 0.064 | -0.050    | 1.789     |
| AZ                                                                         | 0.532  | 0.465               | 1.140  | 0.252 | -0.379    | 1.443     |
| CA                                                                         | 0.861  | 0.464               | 1.850  | 0.064 | -0.049    | 1.772     |
| CO                                                                         | 0.723  | 0.465               | 1.550  | 0.120 | -0.189    | 1.635     |
| CT                                                                         | 1.065  | 0.488               | 2.180  | 0.029 | 0.108     | 2.022     |
| DC                                                                         | 1.110  | 0.532               | 2.090  | 0.037 | 0.068     | 2.152     |

| Outcome: any overlap days<br>Population: commercial,<br>long-term episodes | Coef. | Robust<br>Std. Err. | z     | P>z   | [95 Conf. | Interval] |
|----------------------------------------------------------------------------|-------|---------------------|-------|-------|-----------|-----------|
| DE                                                                         | 1.157 | 0.542               | 2.140 | 0.033 | 0.095     | 2.218     |
| FL                                                                         | 1.011 | 0.463               | 2.180 | 0.029 | 0.103     | 1.919     |
| GA                                                                         | 0.859 | 0.465               | 1.850 | 0.065 | -0.053    | 1.770     |
| HI                                                                         | 1.399 | 0.765               | 1.830 | 0.067 | -0.100    | 2.897     |
| IA                                                                         | 0.664 | 0.472               | 1.400 | 0.160 | -0.262    | 1.590     |
| ID                                                                         | 0.813 | 0.497               | 1.640 | 0.102 | -0.161    | 1.786     |
| IL                                                                         | 0.903 | 0.465               | 1.940 | 0.052 | -0.009    | 1.815     |
| IN                                                                         | 0.663 | 0.466               | 1.420 | 0.155 | -0.250    | 1.575     |
| KS                                                                         | 0.642 | 0.472               | 1.360 | 0.174 | -0.283    | 1.568     |
| KY                                                                         | 0.585 | 0.474               | 1.230 | 0.217 | -0.344    | 1.513     |
| LA                                                                         | 1.046 | 0.465               | 2.250 | 0.024 | 0.135     | 1.958     |
| MA                                                                         | 0.909 | 0.487               | 1.870 | 0.062 | -0.045    | 1.863     |
| MD                                                                         | 0.584 | 0.468               | 1.250 | 0.213 | -0.334    | 1.502     |
| ME                                                                         | 0.918 | 0.574               | 1.600 | 0.110 | -0.207    | 2.043     |
| MI                                                                         | 0.874 | 0.468               | 1.870 | 0.062 | -0.043    | 1.790     |
| MN                                                                         | 0.364 | 0.469               | 0.780 | 0.437 | -0.554    | 1.283     |
| MO                                                                         | 0.982 | 0.465               | 2.110 | 0.035 | 0.071     | 1.893     |
| MS                                                                         | 0.742 | 0.468               | 1.580 | 0.113 | -0.177    | 1.660     |
| MT                                                                         | 0.878 | 0.558               | 1.570 | 0.115 | -0.215    | 1.971     |
| NC                                                                         | 0.866 | 0.465               | 1.860 | 0.062 | -0.045    | 1.776     |
| ND                                                                         | 0.670 | 0.531               | 1.260 | 0.208 | -0.372    | 1.711     |
| NE                                                                         | 0.515 | 0.474               | 1.090 | 0.277 | -0.413    | 1.444     |
| NH                                                                         | 0.650 | 0.535               | 1.220 | 0.224 | -0.397    | 1.698     |
| NJ                                                                         | 1.023 | 0.474               | 2.160 | 0.031 | 0.094     | 1.953     |
| NM                                                                         | 0.128 | 0.488               | 0.260 | 0.793 | -0.829    | 1.085     |
| NV                                                                         | 0.854 | 0.476               | 1.790 | 0.073 | -0.079    | 1.788     |
| NY                                                                         | 0.832 | 0.472               | 1.760 | 0.078 | -0.093    | 1.757     |
| OH                                                                         | 0.523 | 0.465               | 1.130 | 0.260 | -0.387    | 1.434     |
| OK                                                                         | 0.657 | 0.467               | 1.410 | 0.159 | -0.258    | 1.573     |
| OR                                                                         | 0.193 | 0.475               | 0.410 | 0.685 | -0.739    | 1.124     |
| PA                                                                         | 0.774 | 0.470               | 1.650 | 0.099 | -0.147    | 1.696     |

| Outcome: any overlap days<br>Population: commercial,<br>long-term episodes | Coef.  | Robust<br>Std. Err. | z      | P>z   | [95 Conf. | Interval] |
|----------------------------------------------------------------------------|--------|---------------------|--------|-------|-----------|-----------|
| RI                                                                         | 1.110  | 0.491               | 2.260  | 0.024 | 0.148     | 2.071     |
| SC                                                                         | 0.904  | 0.471               | 1.920  | 0.055 | -0.018    | 1.826     |
| SD                                                                         | -0.037 | 0.575               | -0.070 | 0.948 | -1.165    | 1.090     |
| TN                                                                         | 0.717  | 0.467               | 1.540  | 0.125 | -0.198    | 1.632     |
| TX                                                                         | 0.763  | 0.463               | 1.650  | 0.100 | -0.145    | 1.670     |
| UT                                                                         | 0.821  | 0.471               | 1.740  | 0.081 | -0.101    | 1.744     |
| VA                                                                         | 0.862  | 0.469               | 1.840  | 0.066 | -0.057    | 1.780     |
| VT                                                                         | 1.499  | 0.804               | 1.860  | 0.062 | -0.077    | 3.076     |
| WA                                                                         | 0.439  | 0.471               | 0.930  | 0.351 | -0.484    | 1.363     |
| WI                                                                         | 0.604  | 0.467               | 1.300  | 0.195 | -0.310    | 1.519     |
| WV                                                                         | 0.501  | 0.510               | 0.980  | 0.326 | -0.499    | 1.500     |
| WY                                                                         | 0.287  | 0.585               | 0.490  | 0.624 | -0.860    | 1.434     |
| Unknown/other                                                              | 0.863  | 0.482               | 1.790  | 0.073 | -0.082    | 1.807     |
|                                                                            |        |                     |        |       |           |           |
| race/ethnicity                                                             |        |                     |        |       |           |           |
| B                                                                          | -0.290 | 0.036               | -8.080 | 0.000 | -0.361    | -0.220    |
| H                                                                          | -0.266 | 0.039               | -6.800 | 0.000 | -0.343    | -0.189    |
| A                                                                          | -0.255 | 0.098               | -2.610 | 0.009 | -0.446    | -0.064    |
| U                                                                          | -0.021 | 0.059               | -0.350 | 0.723 | -0.136    | 0.095     |
|                                                                            |        |                     |        |       |           |           |
| elix_chf                                                                   | 0.067  | 0.073               | 0.910  | 0.360 | -0.077    | 0.211     |
| elix_arrhythmia                                                            | 0.084  | 0.044               | 1.890  | 0.058 | -0.003    | 0.171     |
| elix_valvular                                                              | -0.083 | 0.072               | -1.160 | 0.247 | -0.224    | 0.058     |
| elix_pulm_circ                                                             | -0.066 | 0.092               | -0.710 | 0.477 | -0.246    | 0.115     |
| elix_periph_vasc                                                           | -0.126 | 0.068               | -1.840 | 0.066 | -0.260    | 0.008     |
| elix_htn_uncomp                                                            | 0.127  | 0.021               | 6.190  | 0.000 | 0.087     | 0.168     |
| elix_htn_comp                                                              | 0.079  | 0.078               | 1.010  | 0.313 | -0.074    | 0.232     |
| elix_oth_neuro                                                             | 0.521  | 0.057               | 9.190  | 0.000 | 0.410     | 0.632     |
| elix_chron_pulm                                                            | 0.227  | 0.035               | 6.560  | 0.000 | 0.159     | 0.295     |
| elix_pep_ulcer                                                             | 0.049  | 0.132               | 0.370  | 0.709 | -0.210    | 0.308     |
| elix_dm_wo_cc                                                              | -0.072 | 0.034               | -2.150 | 0.032 | -0.138    | -0.006    |

| Outcome: any overlap days<br>Population: commercial,<br>long-term episodes | Coef.  | Robust<br>Std. Err. | z      | P>z   | [95 Conf. | Interval] |
|----------------------------------------------------------------------------|--------|---------------------|--------|-------|-----------|-----------|
| elix_dm_w_cc                                                               | -0.226 | 0.048               | -4.700 | 0.000 | -0.320    | -0.132    |
| elix_paralysis                                                             | -0.187 | 0.118               | -1.580 | 0.114 | -0.418    | 0.045     |
| elix_renal                                                                 | -0.087 | 0.077               | -1.130 | 0.260 | -0.238    | 0.064     |
| elix_solid_tumor_wo_mets                                                   | -0.131 | 0.164               | -0.800 | 0.426 | -0.452    | 0.191     |
| elix_liver                                                                 | -0.022 | 0.062               | -0.360 | 0.720 | -0.144    | 0.100     |
| elix_met_cancer                                                            | -1.363 | 0.502               | -2.720 | 0.007 | -2.347    | -0.379    |
| elix_hiv_aids                                                              | 1.091  | 0.210               | 5.190  | 0.000 | 0.679     | 1.503     |
| elix_rheum_arth_coll                                                       | -0.173 | 0.037               | -4.620 | 0.000 | -0.246    | -0.100    |
| elix_hypothyroid                                                           | 0.145  | 0.038               | 3.790  | 0.000 | 0.070     | 0.220     |
| elix_lymphoma                                                              | 0.621  | 0.365               | 1.700  | 0.089 | -0.095    | 1.336     |
| elix_coagulopathy                                                          | 0.006  | 0.083               | 0.080  | 0.940 | -0.156    | 0.168     |
| elix_obesity                                                               | -0.212 | 0.035               | -6.060 | 0.000 | -0.281    | -0.143    |
| elix_weight_loss                                                           | 0.159  | 0.074               | 2.150  | 0.032 | 0.014     | 0.305     |
| elix_fluid_electrolyte                                                     | 0.157  | 0.042               | 3.740  | 0.000 | 0.075     | 0.239     |
| elix_blood_loss_anemia                                                     | -0.163 | 0.142               | -1.140 | 0.253 | -0.442    | 0.116     |
| elix_deficiency_anemia                                                     | 0.102  | 0.074               | 1.380  | 0.169 | -0.043    | 0.246     |
| elix_alcohol                                                               | 0.097  | 0.076               | 1.290  | 0.198 | -0.051    | 0.245     |
| elix_drug_abuse                                                            | 0.155  | 0.043               | 3.640  | 0.000 | 0.072     | 0.239     |
| elix_psychosis                                                             | 0.637  | 0.126               | 5.060  | 0.000 | 0.390     | 0.884     |
| elix_depression                                                            | 1.033  | 0.025               | 41.220 | 0.000 | 0.984     | 1.082     |
| less than 6 months prior<br>insurance coverage                             | -0.047 | 0.024               | -1.990 | 0.047 | -0.093    | -0.001    |
|                                                                            |        |                     |        |       |           |           |
| female                                                                     | 0.514  | 0.021               | 24.320 | 0.000 | 0.473     | 0.556     |
| age                                                                        | -0.005 | 0.001               | -5.450 | 0.000 | -0.007    | -0.003    |
| _cons                                                                      | -3.863 | 0.976               | -3.960 | 0.000 | -5.776    | -1.949    |

Observations: 734,545 person-months contributed by 59,423 individuals

eTable 4. Regression Results: Extent of Coprescribing for Medicare Advantage—Short-term Episodes

| Outcome: any overlap days<br>Population: Medicare Advantage, short-term episodes | Coef.  | Robust Std. Err. | z       | P>z   | [95 Conf. | Interval] |
|----------------------------------------------------------------------------------|--------|------------------|---------|-------|-----------|-----------|
| Spline components                                                                |        |                  |         |       |           |           |
| months before release                                                            | 0.003  | 0.000            | 7.160   | 0.000 | 0.002     | 0.004     |
| months after release                                                             | 0.000  | 0.001            | 0.410   | 0.679 | -0.001    | 0.002     |
| binary post-release                                                              | -0.089 | 0.008            | -10.490 | 0.000 | -0.106    | -0.072    |
| state                                                                            |        |                  |         |       |           |           |
| AL                                                                               | -0.038 | 0.904            | -0.040  | 0.966 | -1.810    | 1.733     |
| AR                                                                               | -0.004 | 0.904            | 0.000   | 0.996 | -1.776    | 1.768     |
| AZ                                                                               | -0.280 | 0.904            | -0.310  | 0.757 | -2.052    | 1.492     |
| CA                                                                               | -0.360 | 0.904            | -0.400  | 0.691 | -2.132    | 1.412     |
| CO                                                                               | -0.465 | 0.905            | -0.510  | 0.608 | -2.239    | 1.309     |
| CT                                                                               | -0.150 | 0.904            | -0.170  | 0.868 | -1.922    | 1.622     |
| DC                                                                               | -0.661 | 0.907            | -0.730  | 0.466 | -2.440    | 1.117     |
| DE                                                                               | -0.058 | 0.920            | -0.060  | 0.950 | -1.860    | 1.745     |
| FL                                                                               | 0.161  | 0.904            | 0.180   | 0.859 | -1.611    | 1.932     |
| GA                                                                               | -0.088 | 0.904            | -0.100  | 0.922 | -1.860    | 1.683     |
| HI                                                                               | -0.634 | 0.905            | -0.700  | 0.484 | -2.408    | 1.140     |
| IA                                                                               | -0.326 | 0.904            | -0.360  | 0.719 | -2.098    | 1.447     |
| ID                                                                               | -0.606 | 0.905            | -0.670  | 0.503 | -2.380    | 1.167     |
| IL                                                                               | -0.204 | 0.904            | -0.230  | 0.822 | -1.975    | 1.568     |
| IN                                                                               | -0.407 | 0.904            | -0.450  | 0.652 | -2.179    | 1.365     |
| KS                                                                               | -0.144 | 0.906            | -0.160  | 0.873 | -1.920    | 1.632     |
| KY                                                                               | -0.189 | 0.906            | -0.210  | 0.835 | -1.965    | 1.587     |
| LA                                                                               | 0.287  | 0.908            | 0.320   | 0.752 | -1.492    | 2.066     |
| MA                                                                               | -0.196 | 0.904            | -0.220  | 0.829 | -1.968    | 1.577     |
| MD                                                                               | -0.437 | 0.907            | -0.480  | 0.630 | -2.215    | 1.340     |
| ME                                                                               | -0.340 | 0.906            | -0.380  | 0.707 | -2.115    | 1.435     |



| Outcome: any overlap days<br>Population: Medicare<br>Advantage, short-term<br>episodes | Coef.  | Robust<br>Std. Err. | z      | P>z   | [95 Conf. | Interval] |
|----------------------------------------------------------------------------------------|--------|---------------------|--------|-------|-----------|-----------|
| MI                                                                                     | -0.411 | 0.911               | -0.450 | 0.652 | -2.198    | 1.375     |
| MN                                                                                     | -0.724 | 0.904               | -0.800 | 0.423 | -2.496    | 1.048     |
| MO                                                                                     | -0.106 | 0.904               | -0.120 | 0.907 | -1.877    | 1.666     |
| MS                                                                                     | -0.196 | 0.920               | -0.210 | 0.832 | -2.000    | 1.608     |
| MT                                                                                     | -0.500 | 0.919               | -0.540 | 0.586 | -2.300    | 1.301     |
| NC                                                                                     | 0.073  | 0.904               | 0.080  | 0.936 | -1.699    | 1.844     |
| ND                                                                                     | -0.549 | 0.907               | -0.610 | 0.545 | -2.326    | 1.228     |
| NE                                                                                     | -0.215 | 0.905               | -0.240 | 0.812 | -1.988    | 1.558     |
| NH                                                                                     | -0.097 | 0.906               | -0.110 | 0.915 | -1.873    | 1.679     |
| NJ                                                                                     | -0.173 | 0.904               | -0.190 | 0.848 | -1.945    | 1.599     |
| NM                                                                                     | -0.385 | 0.904               | -0.430 | 0.670 | -2.158    | 1.388     |
| NV                                                                                     | -0.290 | 0.917               | -0.320 | 0.752 | -2.087    | 1.507     |
| NY                                                                                     | -0.524 | 0.904               | -0.580 | 0.562 | -2.296    | 1.247     |
| OH                                                                                     | -0.247 | 0.904               | -0.270 | 0.785 | -2.019    | 1.525     |
| OK                                                                                     | 0.023  | 0.917               | 0.020  | 0.980 | -1.775    | 1.820     |
| OR                                                                                     | -0.631 | 0.905               | -0.700 | 0.486 | -2.404    | 1.142     |
| PA                                                                                     | -0.110 | 0.905               | -0.120 | 0.903 | -1.883    | 1.663     |
| RI                                                                                     | -0.053 | 0.904               | -0.060 | 0.953 | -1.826    | 1.719     |
| SC                                                                                     | 0.000  | 0.904               | 0.000  | 1.000 | -1.771    | 1.772     |
| SD                                                                                     | -0.543 | 0.907               | -0.600 | 0.549 | -2.321    | 1.234     |
| TN                                                                                     | 0.002  | 0.904               | 0.000  | 0.998 | -1.770    | 1.774     |
| TX                                                                                     | -0.399 | 0.904               | -0.440 | 0.659 | -2.171    | 1.372     |
| UT                                                                                     | -0.311 | 0.904               | -0.340 | 0.731 | -2.082    | 1.461     |
| VA                                                                                     | 0.030  | 0.904               | 0.030  | 0.973 | -1.742    | 1.802     |
| VT                                                                                     | -0.479 | 0.907               | -0.530 | 0.598 | -2.257    | 1.300     |
| WA                                                                                     | -0.642 | 0.904               | -0.710 | 0.478 | -2.414    | 1.130     |
| WI                                                                                     | -0.343 | 0.904               | -0.380 | 0.705 | -2.114    | 1.429     |
| WV                                                                                     | 0.034  | 0.929               | 0.040  | 0.971 | -1.788    | 1.856     |
| WY                                                                                     | -0.710 | 0.916               | -0.780 | 0.438 | -2.506    | 1.086     |
| Unknown/other                                                                          | -0.250 | 0.907               | -0.280 | 0.782 | -2.028    | 1.527     |

| Outcome: any overlap days<br>Population: Medicare<br>Advantage, short-term<br>episodes | Coef.  | Robust<br>Std. Err. | z       | P>z   | [95 Conf. | Interval] |
|----------------------------------------------------------------------------------------|--------|---------------------|---------|-------|-----------|-----------|
| race/ethnicity                                                                         |        |                     |         |       |           |           |
| B                                                                                      | -0.528 | 0.010               | -51.320 | 0.000 | -0.548    | -0.508    |
| H                                                                                      | 0.087  | 0.012               | 7.500   | 0.000 | 0.064     | 0.110     |
| A                                                                                      | -0.549 | 0.030               | -18.050 | 0.000 | -0.608    | -0.489    |
| U                                                                                      | -0.065 | 0.015               | -4.450  | 0.000 | -0.094    | -0.036    |
| elix_chf                                                                               | 0.060  | 0.012               | 4.940   | 0.000 | 0.036     | 0.083     |
| elix_arrhythmia                                                                        | 0.018  | 0.010               | 1.860   | 0.063 | -0.001    | 0.037     |
| elix_valvular                                                                          | -0.053 | 0.015               | -3.660  | 0.000 | -0.082    | -0.025    |
| elix_pulm_circ                                                                         | 0.034  | 0.021               | 1.620   | 0.105 | -0.007    | 0.075     |
| elix_periph_vasc                                                                       | -0.011 | 0.012               | -0.860  | 0.391 | -0.035    | 0.014     |
| elix_htn_uncomp                                                                        | 0.007  | 0.006               | 1.290   | 0.198 | -0.004    | 0.019     |
| elix_htn_comp                                                                          | -0.027 | 0.014               | -1.870  | 0.061 | -0.054    | 0.001     |
| elix_oth_neuro                                                                         | 0.286  | 0.013               | 21.930  | 0.000 | 0.260     | 0.312     |
| elix_chron_pulm                                                                        | 0.331  | 0.008               | 39.410  | 0.000 | 0.315     | 0.348     |
| elix_pep_ulcer                                                                         | -0.016 | 0.041               | -0.390  | 0.700 | -0.097    | 0.065     |
| elix_dm_wo_cc                                                                          | -0.107 | 0.008               | -13.360 | 0.000 | -0.123    | -0.091    |
| elix_dm_w_cc                                                                           | -0.173 | 0.010               | -17.010 | 0.000 | -0.193    | -0.153    |
| elix_paralysis                                                                         | -0.087 | 0.032               | -2.710  | 0.007 | -0.150    | -0.024    |
| elix_renal                                                                             | -0.080 | 0.013               | -6.370  | 0.000 | -0.105    | -0.055    |
| elix_solid_tumor_wo_mets                                                               | -0.078 | 0.018               | -4.250  | 0.000 | -0.114    | -0.042    |
| elix_liver                                                                             | 0.003  | 0.021               | 0.130   | 0.896 | -0.038    | 0.044     |
| elix_met_cancer                                                                        | -0.031 | 0.074               | -0.420  | 0.678 | -0.175    | 0.114     |
| elix_hiv_aids                                                                          | 0.077  | 0.060               | 1.270   | 0.205 | -0.042    | 0.195     |
| elix_rheum_arth_coll                                                                   | -0.081 | 0.016               | -5.170  | 0.000 | -0.112    | -0.051    |
| elix_hypothyroid                                                                       | 0.126  | 0.010               | 12.420  | 0.000 | 0.106     | 0.145     |
| elix_lymphoma                                                                          | -0.036 | 0.062               | -0.580  | 0.563 | -0.157    | 0.085     |
| elix_coagulopathy                                                                      | -0.072 | 0.023               | -3.170  | 0.002 | -0.117    | -0.028    |
| elix_obesity                                                                           | -0.238 | 0.014               | -17.100 | 0.000 | -0.265    | -0.210    |

| Outcome: any overlap days<br>Population: Medicare<br>Advantage, short-term<br>episodes | Coef.  | Robust<br>Std. Err. | z       | P>z   | [95 Conf. | Interval] |
|----------------------------------------------------------------------------------------|--------|---------------------|---------|-------|-----------|-----------|
| elix_weight_loss                                                                       | 0.127  | 0.020               | 6.390   | 0.000 | 0.088     | 0.166     |
| elix_fluid_electrolyte                                                                 | 0.064  | 0.012               | 5.570   | 0.000 | 0.042     | 0.087     |
| elix_blood_loss_anemia                                                                 | -0.049 | 0.034               | -1.450  | 0.147 | -0.116    | 0.017     |
| elix_deficiency_anemia                                                                 | 0.084  | 0.018               | 4.700   | 0.000 | 0.049     | 0.119     |
| elix_alcohol                                                                           | -0.024 | 0.029               | -0.830  | 0.409 | -0.080    | 0.032     |
| elix_drug_abuse                                                                        | 0.409  | 0.026               | 15.750  | 0.000 | 0.358     | 0.459     |
| elix_psychosis                                                                         | 0.544  | 0.020               | 27.410  | 0.000 | 0.505     | 0.583     |
| elix_depression                                                                        | 0.968  | 0.009               | 109.920 | 0.000 | 0.950     | 0.985     |
| less than 6 months prior<br>insurance coverage                                         | -0.023 | 0.007               | -3.170  | 0.002 | -0.037    | -0.009    |
|                                                                                        |        |                     |         |       |           |           |
| female                                                                                 | 0.454  | 0.007               | 65.520  | 0.000 | 0.440     | 0.467     |
| age                                                                                    | -0.019 | 0.000               | -58.930 | 0.000 | -0.019    | -0.018    |
| _cons                                                                                  | -2.761 | 0.949               | -2.910  | 0.004 | -4.621    | -0.901    |

Observations: 3,255,263 person-months contributed by 1,262,727 individuals

eTable 5. Regression Results: Extent of Coprescribing for Medicare Advantage—Long-term Episodes

| Outcome: any overlap days<br>Population: Medicare<br>Advantage, long-term<br>episodes | Coef.  | Robust<br>Std. Err. | z       | P>z   | [95 Conf. | Interval] |
|---------------------------------------------------------------------------------------|--------|---------------------|---------|-------|-----------|-----------|
|                                                                                       |        |                     |         |       |           |           |
| Spline components                                                                     |        |                     |         |       |           |           |
| months before release                                                                 | 0.005  | 0.001               | 4.000   | 0.000 | 0.003     | 0.008     |
| months after release                                                                  | -0.010 | 0.002               | -5.690  | 0.000 | -0.013    | -0.007    |
| binary post-release                                                                   | -0.008 | 0.016               | -0.460  | 0.644 | -0.039    | 0.024     |
|                                                                                       |        |                     |         |       |           |           |
| state                                                                                 |        |                     |         |       |           |           |
| AL                                                                                    | -2.866 | 0.054               | -52.930 | 0.000 | -2.972    | -2.759    |

| Outcome: any overlap days<br>Population: Medicare<br>Advantage, long-term<br>episodes | Coef.  | Robust<br>Std. Err. | z       | P>z   | [95 Conf. | Interval] |
|---------------------------------------------------------------------------------------|--------|---------------------|---------|-------|-----------|-----------|
| AR                                                                                    | -2.957 | 0.076               | -38.850 | 0.000 | -3.107    | -2.808    |
| AZ                                                                                    | -3.305 | 0.092               | -35.740 | 0.000 | -3.487    | -3.124    |
| CA                                                                                    | -3.208 | 0.104               | -30.940 | 0.000 | -3.411    | -3.004    |
| CO                                                                                    | -3.588 | 0.117               | -30.770 | 0.000 | -3.817    | -3.359    |
| CT                                                                                    | -3.069 | 0.084               | -36.320 | 0.000 | -3.234    | -2.903    |
| DC                                                                                    | -3.885 | 0.260               | -14.920 | 0.000 | -4.395    | -3.374    |
| DE                                                                                    | -3.001 | 0.331               | -9.070  | 0.000 | -3.650    | -2.353    |
| FL                                                                                    | -2.759 | 0.031               | -89.320 | 0.000 | -2.819    | -2.698    |
| GA                                                                                    | -3.053 | 0.043               | -70.670 | 0.000 | -3.138    | -2.969    |
| HI                                                                                    | -3.148 | 0.163               | -19.330 | 0.000 | -3.467    | -2.829    |
| IA                                                                                    | -3.181 | 0.111               | -28.540 | 0.000 | -3.399    | -2.962    |
| ID                                                                                    | -3.344 | 0.134               | -25.000 | 0.000 | -3.606    | -3.082    |
| IL                                                                                    | -3.115 | 0.055               | -56.540 | 0.000 | -3.223    | -3.007    |
| IN                                                                                    | -3.266 | 0.058               | -56.360 | 0.000 | -3.379    | -3.152    |
| KS                                                                                    | -3.116 | 0.185               | -16.810 | 0.000 | -3.479    | -2.752    |
| KY                                                                                    | -3.010 | 0.175               | -17.170 | 0.000 | -3.353    | -2.666    |
| LA                                                                                    | -3.404 | 0.333               | -10.210 | 0.000 | -4.058    | -2.750    |
| MA                                                                                    | -3.090 | 0.103               | -30.050 | 0.000 | -3.291    | -2.888    |
| MD                                                                                    | -3.682 | 0.205               | -17.920 | 0.000 | -4.085    | -3.279    |
| ME                                                                                    | -3.343 | 0.189               | -17.680 | 0.000 | -3.714    | -2.972    |
| MI                                                                                    | -3.359 | 0.383               | -8.760  | 0.000 | -4.111    | -2.608    |
| MN                                                                                    | -3.642 | 0.085               | -42.680 | 0.000 | -3.809    | -3.475    |
| MO                                                                                    | -2.975 | 0.051               | -58.830 | 0.000 | -3.074    | -2.876    |
| MS                                                                                    | -2.304 | 0.424               | -5.440  | 0.000 | -3.135    | -1.474    |
| MT                                                                                    | -3.448 | 0.499               | -6.900  | 0.000 | -4.427    | -2.470    |
| NC                                                                                    | -2.769 | 0.037               | -74.410 | 0.000 | -2.842    | -2.696    |
| ND                                                                                    | -3.378 | 0.242               | -13.980 | 0.000 | -3.851    | -2.904    |
| NE                                                                                    | -3.164 | 0.116               | -27.220 | 0.000 | -3.392    | -2.936    |
| NH                                                                                    | -3.096 | 0.189               | -16.350 | 0.000 | -3.467    | -2.725    |
| NJ                                                                                    | -2.948 | 0.070               | -42.200 | 0.000 | -3.085    | -2.811    |

| Outcome: any overlap days<br>Population: Medicare<br>Advantage, long-term<br>episodes | Coef.  | Robust<br>Std. Err. | z       | P>z   | [95 Conf. | Interval] |
|---------------------------------------------------------------------------------------|--------|---------------------|---------|-------|-----------|-----------|
| NM                                                                                    | -3.321 | 0.101               | -32.960 | 0.000 | -3.519    | -3.124    |
| NV                                                                                    | -2.951 | 0.418               | -7.050  | 0.000 | -3.771    | -2.131    |
| NY                                                                                    | -3.352 | 0.048               | -69.690 | 0.000 | -3.446    | -3.257    |
| OH                                                                                    | -3.147 | 0.054               | -58.760 | 0.000 | -3.252    | -3.042    |
| OK                                                                                    | -3.522 | 0.456               | -7.720  | 0.000 | -4.416    | -2.628    |
| OR                                                                                    | -3.638 | 0.133               | -27.390 | 0.000 | -3.898    | -3.378    |
| PA                                                                                    | -3.142 | 0.104               | -30.110 | 0.000 | -3.346    | -2.937    |
| RI                                                                                    | -3.335 | 0.100               | -33.210 | 0.000 | -3.532    | -3.138    |
| SC                                                                                    | -2.873 | 0.058               | -49.170 | 0.000 | -2.987    | -2.758    |
| SD                                                                                    | -2.976 | 0.202               | -14.750 | 0.000 | -3.371    | -2.580    |
| TN                                                                                    | -2.987 | 0.063               | -47.600 | 0.000 | -3.110    | -2.864    |
| TX                                                                                    | -3.116 | 0.049               | -63.590 | 0.000 | -3.212    | -3.020    |
| UT                                                                                    | -3.137 | 0.069               | -45.280 | 0.000 | -3.273    | -3.001    |
| VA                                                                                    | -2.827 | 0.072               | -39.320 | 0.000 | -2.968    | -2.686    |
| VT                                                                                    | -3.757 | 0.268               | -14.040 | 0.000 | -4.281    | -3.232    |
| WA                                                                                    | -3.547 | 0.085               | -41.840 | 0.000 | -3.713    | -3.381    |
| WI                                                                                    | -3.257 | 0.049               | -66.000 | 0.000 | -3.353    | -3.160    |
| WV                                                                                    | -3.324 | 0.668               | -4.980  | 0.000 | -4.632    | -2.015    |
| WY                                                                                    | -3.551 | 0.397               | -8.940  | 0.000 | -4.329    | -2.772    |
| Unknown/other                                                                         | -3.041 | 0.171               | -17.830 | 0.000 | -3.375    | -2.707    |
|                                                                                       |        |                     |         |       |           |           |
| race/ethnicity                                                                        |        |                     |         |       |           |           |
| B                                                                                     | -0.497 | 0.029               | -17.180 | 0.000 | -0.554    | -0.440    |
| H                                                                                     | -0.007 | 0.037               | -0.180  | 0.853 | -0.079    | 0.066     |
| A                                                                                     | -0.469 | 0.105               | -4.450  | 0.000 | -0.676    | -0.262    |
| U                                                                                     | -0.089 | 0.050               | -1.790  | 0.074 | -0.187    | 0.008     |
|                                                                                       |        |                     |         |       |           |           |
| elix_chf                                                                              | 0.016  | 0.030               | 0.530   | 0.594 | -0.043    | 0.075     |
| elix_arrhythmia                                                                       | 0.020  | 0.027               | 0.760   | 0.446 | -0.032    | 0.073     |
| elix_valvular                                                                         | -0.007 | 0.041               | -0.170  | 0.864 | -0.087    | 0.073     |

| Outcome: any overlap days<br>Population: Medicare<br>Advantage, long-term<br>episodes | Coef.  | Robust<br>Std. Err. | z      | P>z   | [95 Conf. | Interval] |
|---------------------------------------------------------------------------------------|--------|---------------------|--------|-------|-----------|-----------|
| elix_pulm_circ                                                                        | -0.090 | 0.053               | -1.700 | 0.089 | -0.194    | 0.014     |
| elix_periph_vasc                                                                      | -0.083 | 0.030               | -2.800 | 0.005 | -0.140    | -0.025    |
| elix_htn_uncomp                                                                       | 0.003  | 0.015               | 0.160  | 0.870 | -0.028    | 0.033     |
| elix_htn_comp                                                                         | -0.007 | 0.036               | -0.180 | 0.854 | -0.077    | 0.064     |
| elix_oth_neuro                                                                        | 0.226  | 0.033               | 6.820  | 0.000 | 0.161     | 0.291     |
| elix_chron_pulm                                                                       | 0.329  | 0.021               | 15.440 | 0.000 | 0.288     | 0.371     |
| elix_pep_ulcer                                                                        | -0.013 | 0.081               | -0.160 | 0.872 | -0.171    | 0.145     |
| elix_dm_wo_cc                                                                         | -0.135 | 0.022               | -6.210 | 0.000 | -0.178    | -0.093    |
| elix_dm_w_cc                                                                          | -0.240 | 0.026               | -9.250 | 0.000 | -0.291    | -0.189    |
| elix_paralysis                                                                        | 0.042  | 0.071               | 0.600  | 0.551 | -0.097    | 0.181     |
| elix_renal                                                                            | -0.131 | 0.032               | -4.110 | 0.000 | -0.193    | -0.069    |
| elix_solid_tumor_wo_mets                                                              | -0.030 | 0.089               | -0.330 | 0.740 | -0.204    | 0.145     |
| elix_liver                                                                            | 0.123  | 0.048               | 2.580  | 0.010 | 0.029     | 0.217     |
| elix_met_cancer                                                                       | -0.100 | 0.272               | -0.370 | 0.712 | -0.633    | 0.432     |
| elix_hiv_aids                                                                         | 0.304  | 0.156               | 1.950  | 0.051 | -0.001    | 0.609     |
| elix_rheum_arth_coll                                                                  | -0.189 | 0.033               | -5.720 | 0.000 | -0.254    | -0.124    |
| elix_hypothyroid                                                                      | 0.130  | 0.028               | 4.740  | 0.000 | 0.077     | 0.184     |
| elix_lymphoma                                                                         | 0.228  | 0.242               | 0.940  | 0.345 | -0.246    | 0.703     |
| elix_coagulopathy                                                                     | -0.040 | 0.058               | -0.680 | 0.494 | -0.153    | 0.074     |
| elix_obesity                                                                          | -0.201 | 0.034               | -5.960 | 0.000 | -0.267    | -0.135    |
| elix_weight_loss                                                                      | -0.009 | 0.042               | -0.210 | 0.830 | -0.091    | 0.073     |
| elix_fluid_electrolyte                                                                | 0.109  | 0.026               | 4.170  | 0.000 | 0.058     | 0.160     |
| elix_blood_loss_anemia                                                                | -0.036 | 0.077               | -0.470 | 0.642 | -0.188    | 0.116     |
| elix_deficiency_anemia                                                                | 0.008  | 0.043               | 0.190  | 0.850 | -0.076    | 0.092     |
| elix_alcohol                                                                          | 0.013  | 0.066               | 0.190  | 0.846 | -0.117    | 0.142     |
| elix_drug_abuse                                                                       | 0.154  | 0.041               | 3.800  | 0.000 | 0.075     | 0.234     |
| elix_psychosis                                                                        | 0.460  | 0.047               | 9.820  | 0.000 | 0.368     | 0.552     |
| elix_depression                                                                       | 0.760  | 0.021               | 35.610 | 0.000 | 0.718     | 0.802     |
| less than 6 months prior<br>insurance coverage                                        | -0.099 | 0.025               | -4.020 | 0.000 | -0.148    | -0.051    |

| Outcome: any overlap days<br>Population: Medicare<br>Advantage, long-term<br>episodes | Coef.  | Robust<br>Std. Err. | z       | P>z   | [95 Conf.<br>Interval] |
|---------------------------------------------------------------------------------------|--------|---------------------|---------|-------|------------------------|
| female                                                                                | 0.388  | 0.021               | 18.440  | 0.000 | 0.346 0.429            |
| age                                                                                   | -0.027 | 0.001               | -31.030 | 0.000 | -0.029 -0.025          |
| _cons                                                                                 | 0.153  | 0.837               | 0.180   | 0.855 | -1.488 1.793           |

Observations: 889,459 person-months contributed by 69,153 individuals

eTable 6. Adjusted Estimates: Extent and Intensity of Coprescription

| Population<br>Opioid episode<br>type                                                       |                          | Commercially insured   |                        | Medicare Advantage     |                        |
|--------------------------------------------------------------------------------------------|--------------------------|------------------------|------------------------|------------------------|------------------------|
|                                                                                            |                          | Long-term              | Short-term             | Long-term              | Short-term             |
|                                                                                            |                          | Value (95% CI)         | Value (95% CI)         | Value (95% CI)         | Value (95% CI)         |
| <b>Extent of coprescription: Adjusted percent of overlapping opioids and BZDs in month</b> |                          |                        |                        |                        |                        |
| Adjusted<br>percent of<br>people with<br>overlapping<br>opioids and<br>BZDs in<br>month    | Study start              | 22.07 (21.26 to 22.87) | 8.83 (8.75 to 8.90)    | 24.42 (23.56 to 25.28) | 13.52 (13.36 to 13.69) |
|                                                                                            | Just before<br>guideline | 23.20 (22.62 to 23.78) | 9.24 (9.16 to 9.31)    | 26.78 (26.16 to 27.41) | 14.47 (14.31 to 14.63) |
|                                                                                            | Just after<br>guideline  | 24.08 (23.49 to 24.66) | 8.98 (8.90 to 9.07)    | 26.65 (26.06 to 27.24) | 13.45 (13.30 to 13.60) |
|                                                                                            | Study end                | 22.18 (21.49 to 22.86) | 8.88 (8.79 to 8.97)    | 24.53 (23.98 to 25.09) | 14.39 (14.24 to 14.54) |
| <b>Intensity of coprescription: Adjusted percent of opioid days with concurrent BZDs</b>   |                          |                        |                        |                        |                        |
| Adjusted<br>percent of<br>opioid days<br>that also<br>have BZDs<br>available               | Study start              | 78.36 (77.53 to 79.18) | 79.03 (78.77 to 79.29) | 82.62 (81.90 to 83.35) | 82.62 (81.90 to 83.35) |
|                                                                                            | Just before<br>guideline | 79.60 (79.02 to 80.17) | 79.44 (79.19 to 79.69) | 83.83 (83.33 to 84.32) | 83.83 (83.33 to 84.32) |
|                                                                                            | Just after<br>guideline  | 79.51 (78.94 to 80.09) | 79.13 (78.85 to 79.42) | 83.50 (83.04 to 83.96) | 83.50 (83.04 to 83.96) |
|                                                                                            | Study end                | 80.05 (79.33 to 80.77) | 79.73 (79.41 to 80.04) | 85.18 (84.74 to 85.62) | 85.18 (84.74 to 85.62) |

---

Adjusted percentages represent predictive margins from a logit or zero-truncated negative binomial model that included patient age, sex, race/ethnicity, state of residence, and Elixhauser comorbidity flags calculated on a rolling 6 month basis. Separate models were specified for each patient population and episode type (commercial and Medicare Advantage; long-term and short-term). Standard errors in the model were adjusted for clustering on individual patient.

BZD=benzodiazepine



eTable 7. Regression Results: Intensity of Coprescribing for the Commercially Insured—Short-term Episodes

| Outcome: number of overlap days<br>Population: commercial, short-term episodes | Coef.  | Robust Std. Err. | z      | P>z   | [95 Conf. | Interval] |
|--------------------------------------------------------------------------------|--------|------------------|--------|-------|-----------|-----------|
| Spline components                                                              |        |                  |        |       |           |           |
| months before release                                                          | 0.000  | 0.000            | 1.810  | 0.071 | 0.000     | 0.000     |
| months after release                                                           | 0.000  | 0.000            | 0.620  | 0.535 | 0.000     | 0.000     |
| binary post-release                                                            | -0.004 | 0.002            | -1.600 | 0.110 | -0.009    | 0.001     |
| state                                                                          |        |                  |        |       |           |           |
| AL                                                                             | 0.081  | 0.028            | 2.860  | 0.004 | 0.025     | 0.137     |
| AR                                                                             | 0.053  | 0.028            | 1.890  | 0.059 | -0.002    | 0.109     |
| AZ                                                                             | 0.006  | 0.028            | 0.230  | 0.817 | -0.048    | 0.061     |
| CA                                                                             | 0.008  | 0.028            | 0.300  | 0.764 | -0.046    | 0.063     |
| CO                                                                             | -0.015 | 0.028            | -0.520 | 0.601 | -0.070    | 0.040     |
| CT                                                                             | 0.031  | 0.029            | 1.070  | 0.285 | -0.026    | 0.088     |
| DC                                                                             | -0.022 | 0.032            | -0.690 | 0.488 | -0.086    | 0.041     |
| DE                                                                             | 0.002  | 0.035            | 0.070  | 0.944 | -0.067    | 0.071     |
| FL                                                                             | 0.036  | 0.028            | 1.310  | 0.191 | -0.018    | 0.091     |
| GA                                                                             | 0.006  | 0.028            | 0.220  | 0.823 | -0.049    | 0.061     |
| HI                                                                             | 0.143  | 0.047            | 3.040  | 0.002 | 0.051     | 0.235     |
| IA                                                                             | 0.008  | 0.028            | 0.280  | 0.777 | -0.048    | 0.064     |
| ID                                                                             | -0.046 | 0.033            | -1.400 | 0.161 | -0.111    | 0.018     |
| IL                                                                             | 0.026  | 0.028            | 0.920  | 0.358 | -0.029    | 0.081     |
| IN                                                                             | 0.028  | 0.028            | 0.980  | 0.328 | -0.028    | 0.083     |
| KS                                                                             | 0.037  | 0.029            | 1.300  | 0.192 | -0.019    | 0.093     |
| KY                                                                             | 0.032  | 0.029            | 1.090  | 0.275 | -0.025    | 0.088     |
| LA                                                                             | 0.034  | 0.028            | 1.230  | 0.220 | -0.021    | 0.089     |
| MA                                                                             | 0.023  | 0.029            | 0.780  | 0.434 | -0.034    | 0.079     |
| MD                                                                             | 0.019  | 0.028            | 0.690  | 0.491 | -0.036    | 0.075     |
| ME                                                                             | 0.008  | 0.039            | 0.210  | 0.832 | -0.068    | 0.084     |
| MI                                                                             | 0.044  | 0.028            | 1.540  | 0.123 | -0.012    | 0.099     |
| MN                                                                             | -0.032 | 0.028            | -1.140 | 0.256 | -0.088    | 0.023     |
| MO                                                                             | 0.039  | 0.028            | 1.410  | 0.160 | -0.016    | 0.094     |
| MS                                                                             | 0.050  | 0.028            | 1.760  | 0.079 | -0.006    | 0.106     |
| MT                                                                             | 0.018  | 0.038            | 0.490  | 0.626 | -0.055    | 0.092     |
| NC                                                                             | 0.013  | 0.028            | 0.480  | 0.633 | -0.041    | 0.068     |
| ND                                                                             | -0.034 | 0.037            | -0.920 | 0.358 | -0.107    | 0.039     |
| NE                                                                             | -0.005 | 0.029            | -0.190 | 0.850 | -0.061    | 0.051     |
| NH                                                                             | 0.003  | 0.032            | 0.100  | 0.917 | -0.059    | 0.066     |
| NJ                                                                             | 0.045  | 0.028            | 1.570  | 0.116 | -0.011    | 0.100     |
| NM                                                                             | 0.019  | 0.030            | 0.630  | 0.531 | -0.040    | 0.078     |

| Outcome: number of overlap days<br>Population: commercial, short-term episodes | Coef.  | Robust Std. Err. | z      | P>z   | [95 Conf. | Interval] |
|--------------------------------------------------------------------------------|--------|------------------|--------|-------|-----------|-----------|
| NV                                                                             | 0.041  | 0.029            | 1.420  | 0.154 | -0.015    | 0.098     |
| NY                                                                             | 0.044  | 0.028            | 1.550  | 0.122 | -0.012    | 0.099     |
| OH                                                                             | 0.015  | 0.028            | 0.550  | 0.583 | -0.040    | 0.070     |
| OK                                                                             | 0.018  | 0.028            | 0.640  | 0.523 | -0.037    | 0.074     |
| OR                                                                             | -0.086 | 0.030            | -2.890 | 0.004 | -0.144    | -0.028    |
| PA                                                                             | 0.035  | 0.028            | 1.250  | 0.213 | -0.020    | 0.091     |
| RI                                                                             | 0.033  | 0.029            | 1.130  | 0.260 | -0.025    | 0.091     |
| SC                                                                             | 0.055  | 0.028            | 1.950  | 0.051 | 0.000     | 0.111     |
| SD                                                                             | -0.012 | 0.041            | -0.300 | 0.767 | -0.092    | 0.068     |
| TN                                                                             | 0.047  | 0.028            | 1.670  | 0.095 | -0.008    | 0.102     |
| TX                                                                             | 0.010  | 0.028            | 0.350  | 0.730 | -0.045    | 0.064     |
| UT                                                                             | 0.001  | 0.029            | 0.040  | 0.970 | -0.055    | 0.057     |
| VA                                                                             | 0.008  | 0.028            | 0.290  | 0.773 | -0.047    | 0.063     |
| VT                                                                             | -0.023 | 0.058            | -0.390 | 0.695 | -0.136    | 0.090     |
| WA                                                                             | -0.056 | 0.029            | -1.950 | 0.051 | -0.113    | 0.000     |
| WI                                                                             | -0.003 | 0.028            | -0.110 | 0.909 | -0.058    | 0.052     |
| WV                                                                             | 0.054  | 0.031            | 1.760  | 0.078 | -0.006    | 0.115     |
| WY                                                                             | -0.037 | 0.037            | -1.000 | 0.315 | -0.110    | 0.035     |
| Unknown/other                                                                  | 0.033  | 0.031            | 1.080  | 0.279 | -0.027    | 0.093     |
|                                                                                |        |                  |        |       |           |           |
| race/ethnicity                                                                 |        |                  |        |       |           |           |
| B                                                                              | -0.014 | 0.003            | -5.380 | 0.000 | -0.020    | -0.009    |
| H                                                                              | -0.005 | 0.003            | -1.910 | 0.056 | -0.010    | 0.000     |
| A                                                                              | -0.032 | 0.006            | -5.620 | 0.000 | -0.043    | -0.021    |
| U                                                                              | -0.002 | 0.004            | -0.570 | 0.569 | -0.009    | 0.005     |
|                                                                                |        |                  |        |       |           |           |
| elix_chf                                                                       | 0.002  | 0.007            | 0.230  | 0.818 | -0.012    | 0.015     |
| elix_arrhythmia                                                                | -0.009 | 0.004            | -2.090 | 0.036 | -0.018    | -0.001    |
| elix_valvular                                                                  | -0.009 | 0.007            | -1.260 | 0.206 | -0.023    | 0.005     |
| elix_pulm_circ                                                                 | -0.005 | 0.010            | -0.560 | 0.578 | -0.024    | 0.014     |
| elix_periph_vasc                                                               | -0.011 | 0.007            | -1.490 | 0.137 | -0.025    | 0.003     |
| elix_htn_uncomp                                                                | -0.001 | 0.002            | -0.350 | 0.723 | -0.005    | 0.003     |
| elix_htn_comp                                                                  | 0.001  | 0.008            | 0.120  | 0.906 | -0.015    | 0.017     |
| elix_oth_neuro                                                                 | 0.030  | 0.005            | 6.290  | 0.000 | 0.021     | 0.040     |
| elix_chron_pulm                                                                | 0.012  | 0.003            | 3.920  | 0.000 | 0.006     | 0.018     |
| elix_pep_ulcer                                                                 | 0.004  | 0.015            | 0.270  | 0.790 | -0.025    | 0.033     |
| elix_dm_wo_cc                                                                  | -0.008 | 0.003            | -2.490 | 0.013 | -0.015    | -0.002    |
| elix_dm_w_cc                                                                   | 0.001  | 0.005            | 0.180  | 0.860 | -0.009    | 0.011     |
| elix_paralysis                                                                 | -0.003 | 0.012            | -0.250 | 0.800 | -0.026    | 0.020     |
| elix_renal                                                                     | 0.006  | 0.007            | 0.760  | 0.447 | -0.009    | 0.020     |
| elix_solid_tumor_wo_mets                                                       | 0.010  | 0.007            | 1.440  | 0.149 | -0.004    | 0.024     |

| Outcome: number of overlap days<br>Population: commercial, short-term episodes | Coef.  | Robust Std. Err. | z      | P>z   | [95 Conf. | Interval] |
|--------------------------------------------------------------------------------|--------|------------------|--------|-------|-----------|-----------|
| elix_liver                                                                     | 0.006  | 0.006            | 0.940  | 0.349 | -0.007    | 0.019     |
| elix_met_cancer                                                                | -0.054 | 0.030            | -1.780 | 0.075 | -0.113    | 0.005     |
| elix_hiv_aids                                                                  | 0.053  | 0.013            | 4.040  | 0.000 | 0.027     | 0.079     |
| elix_rheum_arth_coll                                                           | -0.019 | 0.005            | -4.200 | 0.000 | -0.028    | -0.010    |
| elix_hypothyroid                                                               | 0.002  | 0.003            | 0.480  | 0.630 | -0.005    | 0.008     |
| elix_lymphoma                                                                  | 0.021  | 0.020            | 1.010  | 0.313 | -0.019    | 0.061     |
| elix_coagulopathy                                                              | -0.009 | 0.009            | -1.010 | 0.313 | -0.026    | 0.008     |
| elix_obesity                                                                   | -0.026 | 0.004            | -6.560 | 0.000 | -0.034    | -0.018    |
| elix_weight_loss                                                               | -0.013 | 0.009            | -1.430 | 0.154 | -0.032    | 0.005     |
| elix_fluid_electrolyte                                                         | -0.018 | 0.005            | -3.780 | 0.000 | -0.028    | -0.009    |
| elix_blood_loss_anemia                                                         | -0.023 | 0.015            | -1.530 | 0.126 | -0.052    | 0.006     |
| elix_deficiency_anemia                                                         | 0.019  | 0.007            | 2.750  | 0.006 | 0.006     | 0.033     |
| elix_alcohol                                                                   | -0.005 | 0.007            | -0.830 | 0.408 | -0.018    | 0.008     |
| elix_drug_abuse                                                                | 0.045  | 0.006            | 7.360  | 0.000 | 0.033     | 0.057     |
| elix_psychosis                                                                 | 0.056  | 0.007            | 7.970  | 0.000 | 0.043     | 0.070     |
| elix_depression                                                                | 0.066  | 0.002            | 34.690 | 0.000 | 0.062     | 0.070     |
| less than 6 months prior insurance coverage                                    | 0.011  | 0.002            | 5.700  | 0.000 | 0.007     | 0.015     |
|                                                                                |        |                  |        |       |           |           |
| female                                                                         | 0.020  | 0.002            | 13.500 | 0.000 | 0.017     | 0.023     |
| age                                                                            | 0.002  | 0.000            | 38.120 | 0.000 | 0.002     | 0.002     |
| _cons                                                                          | -0.511 | 0.078            | -6.550 | 0.000 | -0.663    | -0.358    |
| ln(op_days)                                                                    | 1.000  | (exposure)       |        |       |           |           |
| /lnalpha                                                                       | -2.681 | 0.010            |        |       | -2.700    | -2.662    |
| alpha                                                                          | 0.069  | 0.001            |        |       | 0.067     | 0.070     |

Observations: 583,020 person-months contributed by 344,179 individuals

eTable 8. Regression Results: Intensity of Coprescribing for the Commercially Insured—Long-term Episodes

| Outcome: number of overlap days<br>Population: commercial, long-term episodes | Coef.  | Robust Std. Err. | z      | P>z   | [95 Conf. | Interval] |
|-------------------------------------------------------------------------------|--------|------------------|--------|-------|-----------|-----------|
|                                                                               |        |                  |        |       |           |           |
| Spline components                                                             |        |                  |        |       |           |           |
| months before release                                                         | 0.001  | 0.000            | 2.100  | 0.036 | 0.000     | 0.001     |
| months after release                                                          | 0.000  | 0.000            | -0.770 | 0.444 | -0.001    | 0.001     |
| binary post-release                                                           | -0.001 | 0.004            | -0.250 | 0.801 | -0.009    | 0.007     |
|                                                                               |        |                  |        |       |           |           |
| state                                                                         |        |                  |        |       |           |           |
| AL                                                                            | 0.327  | 0.127            | 2.570  | 0.010 | 0.077     | 0.576     |

| Outcome: number of overlap days<br>Population: commercial, long-term episodes | Coef. | Robust Std. Err. | z     | P>z   | [95 Conf. | Interval] |
|-------------------------------------------------------------------------------|-------|------------------|-------|-------|-----------|-----------|
| AR                                                                            | 0.298 | 0.127            | 2.340 | 0.019 | 0.048     | 0.547     |
| AZ                                                                            | 0.230 | 0.127            | 1.810 | 0.071 | -0.019    | 0.479     |
| CA                                                                            | 0.253 | 0.127            | 1.990 | 0.047 | 0.004     | 0.502     |
| CO                                                                            | 0.216 | 0.127            | 1.700 | 0.090 | -0.033    | 0.465     |
| CT                                                                            | 0.231 | 0.130            | 1.780 | 0.076 | -0.024    | 0.486     |
| DC                                                                            | 0.237 | 0.141            | 1.690 | 0.091 | -0.038    | 0.513     |
| DE                                                                            | 0.251 | 0.137            | 1.830 | 0.067 | -0.017    | 0.520     |
| FL                                                                            | 0.299 | 0.127            | 2.360 | 0.018 | 0.051     | 0.547     |
| GA                                                                            | 0.268 | 0.127            | 2.110 | 0.035 | 0.019     | 0.517     |
| HI                                                                            | 0.300 | 0.154            | 1.950 | 0.052 | -0.002    | 0.603     |
| IA                                                                            | 0.262 | 0.129            | 2.040 | 0.041 | 0.011     | 0.514     |
| ID                                                                            | 0.265 | 0.131            | 2.030 | 0.043 | 0.009     | 0.522     |
| IL                                                                            | 0.293 | 0.127            | 2.310 | 0.021 | 0.044     | 0.542     |
| IN                                                                            | 0.292 | 0.127            | 2.300 | 0.021 | 0.043     | 0.541     |
| KS                                                                            | 0.257 | 0.128            | 2.010 | 0.045 | 0.006     | 0.508     |
| KY                                                                            | 0.331 | 0.128            | 2.600 | 0.009 | 0.081     | 0.581     |
| LA                                                                            | 0.299 | 0.127            | 2.360 | 0.018 | 0.050     | 0.548     |
| MA                                                                            | 0.265 | 0.130            | 2.040 | 0.042 | 0.010     | 0.521     |
| MD                                                                            | 0.268 | 0.128            | 2.100 | 0.036 | 0.018     | 0.518     |
| ME                                                                            | 0.175 | 0.168            | 1.040 | 0.297 | -0.154    | 0.505     |
| MI                                                                            | 0.292 | 0.127            | 2.290 | 0.022 | 0.042     | 0.541     |
| MN                                                                            | 0.206 | 0.128            | 1.610 | 0.107 | -0.045    | 0.457     |
| MO                                                                            | 0.274 | 0.127            | 2.160 | 0.031 | 0.025     | 0.523     |
| MS                                                                            | 0.309 | 0.127            | 2.430 | 0.015 | 0.060     | 0.559     |
| MT                                                                            | 0.276 | 0.144            | 1.920 | 0.055 | -0.006    | 0.557     |
| NC                                                                            | 0.283 | 0.127            | 2.230 | 0.026 | 0.034     | 0.531     |
| ND                                                                            | 0.280 | 0.133            | 2.110 | 0.035 | 0.020     | 0.540     |
| NE                                                                            | 0.266 | 0.128            | 2.080 | 0.038 | 0.015     | 0.518     |
| NH                                                                            | 0.189 | 0.146            | 1.300 | 0.195 | -0.097    | 0.474     |
| NJ                                                                            | 0.277 | 0.128            | 2.160 | 0.031 | 0.026     | 0.528     |
| NM                                                                            | 0.258 | 0.130            | 1.980 | 0.047 | 0.003     | 0.513     |
| NV                                                                            | 0.293 | 0.129            | 2.280 | 0.023 | 0.041     | 0.545     |
| NY                                                                            | 0.266 | 0.128            | 2.090 | 0.037 | 0.016     | 0.517     |
| OH                                                                            | 0.275 | 0.127            | 2.160 | 0.031 | 0.026     | 0.523     |
| OK                                                                            | 0.290 | 0.127            | 2.280 | 0.022 | 0.041     | 0.540     |
| OR                                                                            | 0.000 | 0.138            | 0.000 | 0.999 | -0.270    | 0.270     |
| PA                                                                            | 0.295 | 0.127            | 2.320 | 0.020 | 0.046     | 0.545     |
| RI                                                                            | 0.262 | 0.130            | 2.020 | 0.043 | 0.008     | 0.517     |
| SC                                                                            | 0.269 | 0.128            | 2.110 | 0.035 | 0.019     | 0.520     |
| SD                                                                            | 0.177 | 0.173            | 1.020 | 0.305 | -0.161    | 0.515     |
| TN                                                                            | 0.297 | 0.127            | 2.330 | 0.020 | 0.048     | 0.546     |

| Outcome: number of overlap days<br>Population: commercial, long-term episodes | Coef.  | Robust Std. Err. | z      | P>z   | [95 Conf. | Interval] |
|-------------------------------------------------------------------------------|--------|------------------|--------|-------|-----------|-----------|
| TX                                                                            | 0.257  | 0.127            | 2.030  | 0.043 | 0.009     | 0.505     |
| UT                                                                            | 0.236  | 0.129            | 1.840  | 0.066 | -0.016    | 0.488     |
| VA                                                                            | 0.220  | 0.128            | 1.720  | 0.086 | -0.031    | 0.470     |
| VT                                                                            | 0.366  | 0.132            | 2.760  | 0.006 | 0.107     | 0.626     |
| WA                                                                            | 0.157  | 0.129            | 1.220  | 0.222 | -0.095    | 0.410     |
| WI                                                                            | 0.249  | 0.127            | 1.950  | 0.051 | -0.001    | 0.498     |
| WV                                                                            | 0.297  | 0.134            | 2.220  | 0.026 | 0.035     | 0.560     |
| WY                                                                            | 0.267  | 0.148            | 1.800  | 0.072 | -0.024    | 0.558     |
| Unknown/other                                                                 | 0.277  | 0.129            | 2.150  | 0.032 | 0.024     | 0.530     |
|                                                                               |        |                  |        |       |           |           |
| race/ethnicity                                                                |        |                  |        |       |           |           |
| B                                                                             | -0.016 | 0.007            | -2.290 | 0.022 | -0.030    | -0.002    |
| H                                                                             | -0.009 | 0.008            | -1.110 | 0.268 | -0.024    | 0.007     |
| A                                                                             | -0.024 | 0.024            | -1.000 | 0.315 | -0.072    | 0.023     |
| U                                                                             | -0.007 | 0.011            | -0.680 | 0.499 | -0.029    | 0.014     |
|                                                                               |        |                  |        |       |           |           |
| elix_chf                                                                      | -0.024 | 0.014            | -1.720 | 0.086 | -0.052    | 0.003     |
| elix_arrhythmia                                                               | 0.008  | 0.008            | 0.920  | 0.358 | -0.009    | 0.024     |
| elix_valvular                                                                 | -0.008 | 0.014            | -0.580 | 0.561 | -0.037    | 0.020     |
| elix_pulm_circ                                                                | -0.017 | 0.021            | -0.800 | 0.426 | -0.058    | 0.024     |
| elix_periph_vasc                                                              | -0.042 | 0.015            | -2.900 | 0.004 | -0.070    | -0.014    |
| elix_htn_uncomp                                                               | -0.005 | 0.004            | -1.270 | 0.204 | -0.013    | 0.003     |
| elix_htn_comp                                                                 | 0.006  | 0.015            | 0.410  | 0.679 | -0.023    | 0.035     |
| elix_oth_neuro                                                                | 0.017  | 0.009            | 1.980  | 0.048 | 0.000     | 0.034     |
| elix_chron_pulm                                                               | 0.008  | 0.006            | 1.230  | 0.217 | -0.005    | 0.020     |
| elix_pep_ulcer                                                                | -0.004 | 0.023            | -0.170 | 0.866 | -0.049    | 0.041     |
| elix_dm_wo_cc                                                                 | -0.008 | 0.007            | -1.180 | 0.239 | -0.021    | 0.005     |
| elix_dm_w_cc                                                                  | -0.013 | 0.010            | -1.380 | 0.167 | -0.032    | 0.006     |
| elix_paralysis                                                                | -0.030 | 0.021            | -1.400 | 0.162 | -0.072    | 0.012     |
| elix_renal                                                                    | 0.017  | 0.015            | 1.100  | 0.272 | -0.013    | 0.046     |
| elix_solid_tumor_wo_mets                                                      | -0.043 | 0.032            | -1.350 | 0.178 | -0.106    | 0.020     |
| elix_liver                                                                    | 0.002  | 0.011            | 0.180  | 0.855 | -0.020    | 0.024     |
| elix_met_cancer                                                               | -0.413 | 0.255            | -1.620 | 0.106 | -0.913    | 0.088     |
| elix_hiv_aids                                                                 | 0.058  | 0.026            | 2.190  | 0.028 | 0.006     | 0.109     |
| elix_rheum_arth_coll                                                          | -0.027 | 0.008            | -3.430 | 0.001 | -0.042    | -0.011    |
| elix_hypothyroid                                                              | -0.013 | 0.008            | -1.630 | 0.102 | -0.028    | 0.003     |
| elix_lymphoma                                                                 | -0.082 | 0.113            | -0.720 | 0.472 | -0.304    | 0.141     |
| elix_coagulopathy                                                             | 0.008  | 0.015            | 0.510  | 0.608 | -0.022    | 0.037     |
| elix_obesity                                                                  | -0.018 | 0.008            | -2.370 | 0.018 | -0.033    | -0.003    |
| elix_weight_loss                                                              | -0.018 | 0.015            | -1.210 | 0.225 | -0.048    | 0.011     |
| elix_fluid_electrolyte                                                        | -0.010 | 0.008            | -1.250 | 0.210 | -0.026    | 0.006     |

| Outcome: number of overlap days<br>Population: commercial, long-term episodes | Coef.  | Robust Std. Err. | z      | P>z   | [95 Conf. | Interval] |
|-------------------------------------------------------------------------------|--------|------------------|--------|-------|-----------|-----------|
| elix_blood_loss_anemia                                                        | 0.000  | 0.027            | -0.020 | 0.986 | -0.053    | 0.053     |
| elix_deficiency_anemia                                                        | 0.028  | 0.013            | 2.140  | 0.032 | 0.002     | 0.053     |
| elix_alcohol                                                                  | -0.007 | 0.014            | -0.540 | 0.590 | -0.035    | 0.020     |
| elix_drug_abuse                                                               | -0.015 | 0.009            | -1.730 | 0.083 | -0.032    | 0.002     |
| elix_psychosis                                                                | 0.054  | 0.018            | 3.010  | 0.003 | 0.019     | 0.089     |
| elix_depression                                                               | 0.040  | 0.004            | 9.680  | 0.000 | 0.032     | 0.048     |
| less than 6 months prior insurance coverage                                   | 0.003  | 0.006            | 0.510  | 0.613 | -0.008    | 0.014     |
| female                                                                        | -0.009 | 0.004            | -2.150 | 0.032 | -0.017    | -0.001    |
| age                                                                           | 0.001  | 0.000            | 6.400  | 0.000 | 0.001     | 0.002     |
| _cons                                                                         | -0.957 | 0.229            | -4.190 | 0.000 | -1.405    | -0.509    |
| ln(op_days)                                                                   | 1.000  | (exposure)       |        |       |           |           |
| /lnalpha                                                                      | -1.923 | 0.015            |        |       | -1.953    | -1.894    |
| alpha                                                                         | 0.146  | 0.002            |        |       | 0.142     | 0.150     |
| Observations: 168,810 person-months contributed by 22,290 individuals         |        |                  |        |       |           |           |

eTable 9. Regression Results: Intensity of Coprescribing for Medicare Advantage—Short-term Episodes

| Outcome: number of overlap days<br>Population: Medicare Advantage, short-term episodes | Coef.  | Robust Std. Err. | z       | P>z   | [95 Conf. | Interval] |
|----------------------------------------------------------------------------------------|--------|------------------|---------|-------|-----------|-----------|
| Spline components                                                                      |        |                  |         |       |           |           |
| months before release                                                                  | 0.000  | 0.000            | 2.230   | 0.026 | 0.000     | 0.001     |
| months after release                                                                   | 0.000  | 0.000            | 0.380   | 0.706 | 0.000     | 0.000     |
| binary post-release                                                                    | -0.002 | 0.002            | -0.820  | 0.409 | -0.007    | 0.003     |
| state                                                                                  |        |                  |         |       |           |           |
| AL                                                                                     | -0.084 | 0.006            | -13.690 | 0.000 | -0.096    | -0.072    |
| AR                                                                                     | -0.081 | 0.007            | -11.270 | 0.000 | -0.095    | -0.067    |
| AZ                                                                                     | -0.105 | 0.008            | -12.900 | 0.000 | -0.122    | -0.089    |
| CA                                                                                     | -0.141 | 0.009            | -16.340 | 0.000 | -0.158    | -0.124    |
| CO                                                                                     | -0.133 | 0.012            | -11.490 | 0.000 | -0.155    | -0.110    |
| CT                                                                                     | -0.112 | 0.007            | -15.000 | 0.000 | -0.126    | -0.097    |
| DC                                                                                     | -0.114 | 0.021            | -5.520  | 0.000 | -0.154    | -0.073    |
| DE                                                                                     | -0.195 | 0.049            | -4.010  | 0.000 | -0.291    | -0.100    |
| FL                                                                                     | -0.087 | 0.005            | -16.770 | 0.000 | -0.097    | -0.077    |
| GA                                                                                     | -0.115 | 0.006            | -20.380 | 0.000 | -0.126    | -0.104    |
| HI                                                                                     | -0.107 | 0.012            | -8.960  | 0.000 | -0.130    | -0.083    |
| IA                                                                                     | -0.118 | 0.009            | -12.570 | 0.000 | -0.137    | -0.100    |

| Outcome: number of overlap days<br>Population: Medicare Advantage, short-term episodes | Coef.  | Robust Std. Err. | z       | P>z   | [95 Conf. | Interval] |
|----------------------------------------------------------------------------------------|--------|------------------|---------|-------|-----------|-----------|
| ID                                                                                     | -0.142 | 0.012            | -11.500 | 0.000 | -0.166    | -0.118    |
| IL                                                                                     | -0.109 | 0.006            | -18.350 | 0.000 | -0.121    | -0.097    |
| IN                                                                                     | -0.111 | 0.007            | -16.850 | 0.000 | -0.124    | -0.098    |
| KS                                                                                     | -0.124 | 0.017            | -7.270  | 0.000 | -0.158    | -0.091    |
| KY                                                                                     | -0.092 | 0.014            | -6.760  | 0.000 | -0.119    | -0.065    |
| LA                                                                                     | -0.130 | 0.022            | -6.010  | 0.000 | -0.173    | -0.088    |
| MA                                                                                     | -0.119 | 0.009            | -13.680 | 0.000 | -0.136    | -0.102    |
| MD                                                                                     | -0.088 | 0.019            | -4.650  | 0.000 | -0.125    | -0.051    |
| ME                                                                                     | -0.123 | 0.014            | -8.610  | 0.000 | -0.151    | -0.095    |
| MI                                                                                     | -0.113 | 0.029            | -3.960  | 0.000 | -0.169    | -0.057    |
| MN                                                                                     | -0.161 | 0.008            | -19.590 | 0.000 | -0.177    | -0.145    |
| MO                                                                                     | -0.099 | 0.006            | -16.940 | 0.000 | -0.111    | -0.088    |
| MS                                                                                     | -0.077 | 0.033            | -2.310  | 0.021 | -0.142    | -0.012    |
| MT                                                                                     | -0.129 | 0.042            | -3.040  | 0.002 | -0.211    | -0.046    |
| NC                                                                                     | -0.109 | 0.005            | -20.210 | 0.000 | -0.120    | -0.099    |
| ND                                                                                     | -0.130 | 0.019            | -6.920  | 0.000 | -0.167    | -0.093    |
| NE                                                                                     | -0.110 | 0.011            | -10.300 | 0.000 | -0.131    | -0.089    |
| NH                                                                                     | -0.132 | 0.017            | -7.740  | 0.000 | -0.166    | -0.099    |
| NJ                                                                                     | -0.088 | 0.006            | -14.040 | 0.000 | -0.100    | -0.076    |
| NM                                                                                     | -0.127 | 0.009            | -13.690 | 0.000 | -0.145    | -0.109    |
| NV                                                                                     | -0.124 | 0.038            | -3.230  | 0.001 | -0.199    | -0.049    |
| NY                                                                                     | -0.123 | 0.006            | -20.450 | 0.000 | -0.135    | -0.111    |
| OH                                                                                     | -0.086 | 0.006            | -13.870 | 0.000 | -0.098    | -0.074    |
| OK                                                                                     | -0.093 | 0.028            | -3.280  | 0.001 | -0.148    | -0.037    |
| OR                                                                                     | -0.168 | 0.013            | -12.550 | 0.000 | -0.194    | -0.142    |
| PA                                                                                     | -0.123 | 0.010            | -12.500 | 0.000 | -0.142    | -0.103    |
| RI                                                                                     | -0.115 | 0.009            | -12.910 | 0.000 | -0.132    | -0.097    |
| SC                                                                                     | -0.092 | 0.006            | -14.980 | 0.000 | -0.104    | -0.080    |
| SD                                                                                     | -0.134 | 0.020            | -6.620  | 0.000 | -0.173    | -0.094    |
| TN                                                                                     | -0.079 | 0.006            | -12.230 | 0.000 | -0.091    | -0.066    |
| TX                                                                                     | -0.113 | 0.006            | -19.280 | 0.000 | -0.124    | -0.101    |
| UT                                                                                     | -0.129 | 0.007            | -18.200 | 0.000 | -0.143    | -0.115    |
| VA                                                                                     | -0.083 | 0.007            | -12.060 | 0.000 | -0.097    | -0.070    |
| VT                                                                                     | -0.120 | 0.019            | -6.210  | 0.000 | -0.157    | -0.082    |
| WA                                                                                     | -0.152 | 0.010            | -15.400 | 0.000 | -0.171    | -0.132    |
| WI                                                                                     | -0.121 | 0.006            | -20.030 | 0.000 | -0.133    | -0.110    |
| WV                                                                                     | -0.079 | 0.030            | -2.610  | 0.009 | -0.138    | -0.020    |
| WY                                                                                     | -0.217 | 0.046            | -4.680  | 0.000 | -0.309    | -0.126    |
| Unknown/other                                                                          | -0.127 | 0.022            | -5.650  | 0.000 | -0.171    | -0.083    |
|                                                                                        |        |                  |         |       |           |           |
| race/ethnicity                                                                         |        |                  |         |       |           |           |

| Outcome: number of overlap days<br>Population: Medicare Advantage, short-term episodes | Coef.  | Robust Std. Err. | z       | P>z   | [95 Conf. | Interval] |
|----------------------------------------------------------------------------------------|--------|------------------|---------|-------|-----------|-----------|
| B                                                                                      | -0.011 | 0.002            | -5.010  | 0.000 | -0.015    | -0.007    |
| H                                                                                      | 0.007  | 0.002            | 3.050   | 0.002 | 0.002     | 0.011     |
| A                                                                                      | 0.004  | 0.007            | 0.580   | 0.563 | -0.009    | 0.017     |
| U                                                                                      | -0.002 | 0.003            | -0.650  | 0.519 | -0.008    | 0.004     |
|                                                                                        |        |                  |         |       |           |           |
| elix_chf                                                                               | -0.005 | 0.003            | -1.550  | 0.121 | -0.010    | 0.001     |
| elix_arrhythmia                                                                        | -0.007 | 0.002            | -2.990  | 0.003 | -0.012    | -0.002    |
| elix_valvular                                                                          | -0.003 | 0.004            | -0.690  | 0.488 | -0.010    | 0.005     |
| elix_pulm_circ                                                                         | 0.002  | 0.005            | 0.340   | 0.736 | -0.008    | 0.011     |
| elix_periph_vasc                                                                       | -0.008 | 0.003            | -2.480  | 0.013 | -0.014    | -0.002    |
| elix_htn_uncomp                                                                        | -0.007 | 0.001            | -5.170  | 0.000 | -0.010    | -0.005    |
| elix_htn_comp                                                                          | -0.009 | 0.004            | -2.400  | 0.016 | -0.016    | -0.002    |
| elix_oth_neuro                                                                         | -0.002 | 0.003            | -0.860  | 0.391 | -0.008    | 0.003     |
| elix_chron_pulm                                                                        | 0.004  | 0.002            | 2.320   | 0.020 | 0.001     | 0.008     |
| elix_pep_ulcer                                                                         | -0.001 | 0.010            | -0.070  | 0.941 | -0.020    | 0.019     |
| elix_dm_wo_cc                                                                          | -0.012 | 0.002            | -6.200  | 0.000 | -0.016    | -0.008    |
| elix_dm_w_cc                                                                           | -0.011 | 0.003            | -4.140  | 0.000 | -0.016    | -0.006    |
| elix_paralysis                                                                         | -0.013 | 0.007            | -1.790  | 0.074 | -0.028    | 0.001     |
| elix_renal                                                                             | -0.001 | 0.003            | -0.460  | 0.643 | -0.007    | 0.005     |
| elix_solid_tumor_wo_mets                                                               | 0.002  | 0.005            | 0.300   | 0.768 | -0.009    | 0.012     |
| elix_liver                                                                             | -0.001 | 0.005            | -0.130  | 0.900 | -0.010    | 0.009     |
| elix_met_cancer                                                                        | 0.019  | 0.019            | 0.990   | 0.323 | -0.019    | 0.057     |
| elix_hiv_aids                                                                          | 0.026  | 0.010            | 2.630   | 0.009 | 0.007     | 0.046     |
| elix_rheum_arth_coll                                                                   | -0.032 | 0.004            | -8.760  | 0.000 | -0.039    | -0.025    |
| elix_hypothyroid                                                                       | -0.003 | 0.002            | -1.100  | 0.269 | -0.007    | 0.002     |
| elix_lymphoma                                                                          | 0.011  | 0.016            | 0.670   | 0.501 | -0.020    | 0.041     |
| elix_coagulopathy                                                                      | -0.004 | 0.006            | -0.730  | 0.464 | -0.015    | 0.007     |
| elix_obesity                                                                           | -0.020 | 0.004            | -5.660  | 0.000 | -0.027    | -0.013    |
| elix_weight_loss                                                                       | -0.019 | 0.005            | -3.800  | 0.000 | -0.028    | -0.009    |
| elix_fluid_electrolyte                                                                 | -0.008 | 0.003            | -2.820  | 0.005 | -0.014    | -0.002    |
| elix_blood_loss_anemia                                                                 | -0.008 | 0.009            | -0.920  | 0.359 | -0.024    | 0.009     |
| elix_deficiency_anemia                                                                 | 0.006  | 0.004            | 1.380   | 0.168 | -0.002    | 0.014     |
| elix_alcohol                                                                           | -0.017 | 0.006            | -2.790  | 0.005 | -0.029    | -0.005    |
| elix_drug_abuse                                                                        | 0.017  | 0.005            | 3.500   | 0.000 | 0.007     | 0.026     |
| elix_psychosis                                                                         | 0.012  | 0.004            | 3.150   | 0.002 | 0.005     | 0.019     |
| elix_depression                                                                        | 0.019  | 0.002            | 10.820  | 0.000 | 0.015     | 0.022     |
| less than 6 months prior insurance coverage                                            | 0.003  | 0.002            | 1.530   | 0.127 | -0.001    | 0.007     |
|                                                                                        |        |                  |         |       |           |           |
| female                                                                                 | 0.001  | 0.001            | 0.890   | 0.373 | -0.002    | 0.004     |
| age                                                                                    | -0.001 | 0.000            | -16.810 | 0.000 | -0.001    | -0.001    |



| Outcome: number of overlap days<br>Population: Medicare Advantage, short-term episodes | Coef.  | Robust Std. Err. | z      | P>z   | [95 Conf. Interval] |
|----------------------------------------------------------------------------------------|--------|------------------|--------|-------|---------------------|
| _cons                                                                                  | -0.170 | 0.082            | -2.060 | 0.040 | -0.331 -0.008       |
| ln(op_days)                                                                            | 1.000  | (exposure)       |        |       |                     |
| /lnalpha                                                                               | -2.901 | 0.013            |        |       | -2.926 -2.876       |
| alpha                                                                                  | 0.055  | 0.001            |        |       | 0.054 0.056         |
| Observations: 454,771 person-months contributed by 193,656 individuals                 |        |                  |        |       |                     |

eTable 10. Regression Results: Intensity of Coprescribing for Medicare Advantage—Long-term Episodes

| Outcome: number of overlap days<br>Population: Medicare Advantage, long-term episodes | Coef.  | Robust Std. Err. | z       | P>z   | [95 Conf. Interval] |
|---------------------------------------------------------------------------------------|--------|------------------|---------|-------|---------------------|
| Spline components                                                                     |        |                  |         |       |                     |
| months before release                                                                 | 0.001  | 0.000            | 2.350   | 0.019 | 0.000 0.001         |
| months after release                                                                  | 0.000  | 0.000            | 0.860   | 0.387 | 0.000 0.001         |
| binary post-release                                                                   | -0.004 | 0.003            | -1.160  | 0.246 | -0.010 0.003        |
| state                                                                                 |        |                  |         |       |                     |
| AL                                                                                    | -0.089 | 0.007            | -12.340 | 0.000 | -0.103 -0.074       |
| AR                                                                                    | -0.106 | 0.011            | -9.820  | 0.000 | -0.127 -0.085       |
| AZ                                                                                    | -0.145 | 0.018            | -8.230  | 0.000 | -0.180 -0.111       |
| CA                                                                                    | -0.175 | 0.018            | -9.630  | 0.000 | -0.211 -0.140       |
| CO                                                                                    | -0.189 | 0.023            | -8.250  | 0.000 | -0.234 -0.144       |
| CT                                                                                    | -0.147 | 0.014            | -10.550 | 0.000 | -0.175 -0.120       |
| DC                                                                                    | -0.225 | 0.038            | -5.980  | 0.000 | -0.298 -0.151       |
| DE                                                                                    | -0.187 | 0.064            | -2.910  | 0.004 | -0.312 -0.061       |
| FL                                                                                    | -0.097 | 0.004            | -21.690 | 0.000 | -0.106 -0.089       |
| GA                                                                                    | -0.120 | 0.007            | -17.780 | 0.000 | -0.134 -0.107       |
| HI                                                                                    | -0.100 | 0.022            | -4.630  | 0.000 | -0.142 -0.057       |
| IA                                                                                    | -0.102 | 0.016            | -6.270  | 0.000 | -0.134 -0.070       |
| ID                                                                                    | -0.167 | 0.022            | -7.610  | 0.000 | -0.210 -0.124       |
| IL                                                                                    | -0.121 | 0.009            | -13.560 | 0.000 | -0.138 -0.103       |
| IN                                                                                    | -0.133 | 0.010            | -13.280 | 0.000 | -0.152 -0.113       |
| KS                                                                                    | -0.159 | 0.029            | -5.430  | 0.000 | -0.217 -0.102       |
| KY                                                                                    | -0.114 | 0.027            | -4.210  | 0.000 | -0.166 -0.061       |
| LA                                                                                    | -0.106 | 0.043            | -2.500  | 0.012 | -0.190 -0.023       |
| MA                                                                                    | -0.119 | 0.014            | -8.510  | 0.000 | -0.146 -0.091       |
| MD                                                                                    | -0.143 | 0.035            | -4.130  | 0.000 | -0.211 -0.075       |
| ME                                                                                    | -0.172 | 0.034            | -5.110  | 0.000 | -0.238 -0.106       |
| MI                                                                                    | -0.267 | 0.080            | -3.350  | 0.001 | -0.423 -0.111       |

| Outcome: number of overlap days<br>Population: Medicare Advantage, long-term episodes | Coef.  | Robust Std. Err. | z       | P>z   | [95 Conf. | Interval] |
|---------------------------------------------------------------------------------------|--------|------------------|---------|-------|-----------|-----------|
| MN                                                                                    | -0.187 | 0.016            | -11.420 | 0.000 | -0.220    | -0.155    |
| MO                                                                                    | -0.119 | 0.008            | -14.780 | 0.000 | -0.135    | -0.103    |
| MS                                                                                    | -0.098 | 0.060            | -1.630  | 0.103 | -0.215    | 0.020     |
| MT                                                                                    | -0.071 | 0.059            | -1.220  | 0.224 | -0.186    | 0.044     |
| NC                                                                                    | -0.107 | 0.006            | -19.320 | 0.000 | -0.117    | -0.096    |
| ND                                                                                    | -0.122 | 0.037            | -3.330  | 0.001 | -0.194    | -0.050    |
| NE                                                                                    | -0.206 | 0.024            | -8.670  | 0.000 | -0.252    | -0.159    |
| NH                                                                                    | -0.185 | 0.042            | -4.440  | 0.000 | -0.267    | -0.104    |
| NJ                                                                                    | -0.116 | 0.010            | -11.060 | 0.000 | -0.137    | -0.095    |
| NM                                                                                    | -0.146 | 0.015            | -9.980  | 0.000 | -0.174    | -0.117    |
| NV                                                                                    | -0.203 | 0.079            | -2.570  | 0.010 | -0.358    | -0.048    |
| NY                                                                                    | -0.121 | 0.008            | -16.090 | 0.000 | -0.136    | -0.106    |
| OH                                                                                    | -0.105 | 0.008            | -12.760 | 0.000 | -0.121    | -0.089    |
| OK                                                                                    | -0.106 | 0.055            | -1.910  | 0.056 | -0.214    | 0.003     |
| OR                                                                                    | -0.268 | 0.037            | -7.340  | 0.000 | -0.340    | -0.197    |
| PA                                                                                    | -0.151 | 0.017            | -8.810  | 0.000 | -0.185    | -0.118    |
| RI                                                                                    | -0.154 | 0.016            | -9.540  | 0.000 | -0.185    | -0.122    |
| SC                                                                                    | -0.108 | 0.008            | -13.400 | 0.000 | -0.123    | -0.092    |
| SD                                                                                    | -0.130 | 0.036            | -3.630  | 0.000 | -0.200    | -0.060    |
| TN                                                                                    | -0.081 | 0.007            | -11.230 | 0.000 | -0.096    | -0.067    |
| TX                                                                                    | -0.117 | 0.007            | -16.220 | 0.000 | -0.131    | -0.103    |
| UT                                                                                    | -0.142 | 0.011            | -12.890 | 0.000 | -0.163    | -0.120    |
| VA                                                                                    | -0.092 | 0.009            | -10.370 | 0.000 | -0.109    | -0.075    |
| VT                                                                                    | -0.228 | 0.058            | -3.910  | 0.000 | -0.342    | -0.114    |
| WA                                                                                    | -0.182 | 0.018            | -10.140 | 0.000 | -0.218    | -0.147    |
| WI                                                                                    | -0.168 | 0.010            | -17.540 | 0.000 | -0.187    | -0.149    |
| WV                                                                                    | -0.055 | 0.063            | -0.880  | 0.378 | -0.179    | 0.068     |
| WY                                                                                    | -0.120 | 0.041            | -2.940  | 0.003 | -0.201    | -0.040    |
| Unknown/other                                                                         | -0.140 | 0.021            | -6.590  | 0.000 | -0.181    | -0.098    |
|                                                                                       |        |                  |         |       |           |           |
| race/ethnicity                                                                        |        |                  |         |       |           |           |
| B                                                                                     | -0.016 | 0.004            | -3.480  | 0.001 | -0.024    | -0.007    |
| H                                                                                     | -0.003 | 0.005            | -0.650  | 0.518 | -0.013    | 0.007     |
| A                                                                                     | -0.070 | 0.023            | -3.020  | 0.003 | -0.115    | -0.025    |
| U                                                                                     | -0.011 | 0.008            | -1.350  | 0.177 | -0.026    | 0.005     |
|                                                                                       |        |                  |         |       |           |           |
| elix_chf                                                                              | -0.010 | 0.005            | -1.870  | 0.062 | -0.020    | 0.000     |
| elix_arrhythmia                                                                       | -0.014 | 0.005            | -3.020  | 0.003 | -0.023    | -0.005    |
| elix_valvular                                                                         | -0.003 | 0.007            | -0.460  | 0.647 | -0.016    | 0.010     |
| elix_pulm_circ                                                                        | -0.010 | 0.010            | -0.980  | 0.325 | -0.028    | 0.009     |
| elix_periph_vasc                                                                      | -0.021 | 0.006            | -3.800  | 0.000 | -0.032    | -0.010    |

| Outcome: number of overlap days<br>Population: Medicare Advantage, long-term episodes | Coef.  | Robust Std. Err. | z       | P>z   | [95 Conf. Interval] |
|---------------------------------------------------------------------------------------|--------|------------------|---------|-------|---------------------|
| elix_htn_uncomp                                                                       | -0.003 | 0.002            | -1.260  | 0.209 | -0.008 0.002        |
| elix_htn_comp                                                                         | 0.002  | 0.007            | 0.240   | 0.811 | -0.012 0.015        |
| elix_oth_neuro                                                                        | -0.007 | 0.005            | -1.370  | 0.170 | -0.017 0.003        |
| elix_chron_pulm                                                                       | 0.010  | 0.003            | 3.030   | 0.002 | 0.003 0.016         |
| elix_pep_ulcer                                                                        | -0.008 | 0.014            | -0.570  | 0.571 | -0.035 0.019        |
| elix_dm_wo_cc                                                                         | -0.010 | 0.004            | -2.680  | 0.007 | -0.017 -0.003       |
| elix_dm_w_cc                                                                          | -0.021 | 0.005            | -4.690  | 0.000 | -0.030 -0.012       |
| elix_paralysis                                                                        | -0.018 | 0.013            | -1.440  | 0.151 | -0.043 0.007        |
| elix_renal                                                                            | -0.019 | 0.006            | -3.210  | 0.001 | -0.031 -0.008       |
| elix_solid_tumor_wo_mets                                                              | -0.007 | 0.017            | -0.390  | 0.700 | -0.041 0.027        |
| elix_liver                                                                            | -0.001 | 0.007            | -0.140  | 0.891 | -0.015 0.013        |
| elix_met_cancer                                                                       | 0.059  | 0.045            | 1.320   | 0.187 | -0.029 0.148        |
| elix_hiv_aids                                                                         | 0.015  | 0.021            | 0.720   | 0.470 | -0.026 0.056        |
| elix_rheum_arth_coll                                                                  | -0.034 | 0.006            | -5.890  | 0.000 | -0.046 -0.023       |
| elix_hypothyroid                                                                      | -0.008 | 0.005            | -1.630  | 0.103 | -0.017 0.002        |
| elix_lymphoma                                                                         | 0.040  | 0.039            | 1.010   | 0.314 | -0.038 0.117        |
| elix_coagulopathy                                                                     | -0.009 | 0.010            | -0.830  | 0.406 | -0.029 0.012        |
| elix_obesity                                                                          | -0.016 | 0.006            | -2.740  | 0.006 | -0.027 -0.004       |
| elix_weight_loss                                                                      | -0.019 | 0.008            | -2.300  | 0.022 | -0.034 -0.003       |
| elix_fluid_electrolyte                                                                | -0.008 | 0.005            | -1.680  | 0.093 | -0.017 0.001        |
| elix_blood_loss_anemia                                                                | -0.002 | 0.013            | -0.120  | 0.901 | -0.027 0.024        |
| elix_deficiency_anemia                                                                | -0.004 | 0.007            | -0.500  | 0.618 | -0.017 0.010        |
| elix_alcohol                                                                          | -0.022 | 0.009            | -2.280  | 0.022 | -0.040 -0.003       |
| elix_drug_abuse                                                                       | -0.002 | 0.006            | -0.380  | 0.703 | -0.014 0.009        |
| elix_psychosis                                                                        | 0.004  | 0.006            | 0.680   | 0.498 | -0.008 0.017        |
| elix_depression                                                                       | 0.012  | 0.003            | 3.950   | 0.000 | 0.006 0.018         |
| less than 6 months prior insurance coverage                                           | -0.004 | 0.005            | -0.880  | 0.380 | -0.014 0.006        |
| female                                                                                | -0.012 | 0.003            | -3.790  | 0.000 | -0.017 -0.006       |
| age                                                                                   | -0.001 | 0.000            | -11.090 | 0.000 | -0.002 -0.001       |
| _cons                                                                                 | -0.318 | 0.156            | -2.030  | 0.042 | -0.623 -0.012       |
| ln(op_days)                                                                           | 1.000  | (exposure)       |         |       |                     |
| /lnalpha                                                                              | -2.410 | 0.018            |         |       | -2.445 -2.374       |
| alpha                                                                                 | 0.090  | 0.002            |         |       | 0.087 0.093         |

Observations: 228,195 person-months contributed by 24,979 individuals

eTable 11. Regression Results: Intensity of Coprescription Among Commercial Beneficiaries With and Without Same Physician Prescribing Opioids and Benzodiazepines—Short-term Opioid Use Episodes

| Outcome: number of overlap days<br>Population: Commercial short-term episodes | IRR   | Robust Std. Err. | z      | P>z   | [95 Conf. | Interval] |
|-------------------------------------------------------------------------------|-------|------------------|--------|-------|-----------|-----------|
| Same physician prescribing both medications                                   |       |                  |        |       |           |           |
| Yes                                                                           | 0.577 | 0.091            | -3.500 | 0.000 | 0.424     | 0.785     |
| Unknown                                                                       | 0.841 | 0.290            | -0.500 | 0.616 | 0.428     | 1.653     |
| Spline components                                                             |       |                  |        |       |           |           |
| months before release                                                         | 1.000 | 0.000            | -0.130 | 0.895 | 1.000     | 1.000     |
| months after release                                                          | 1.000 | 0.000            | 0.030  | 0.977 | 0.999     | 1.001     |
| binary post-release                                                           | 0.996 | 0.004            | -1.030 | 0.303 | 0.989     | 1.004     |
| same physician#months before release                                          |       |                  |        |       |           |           |
| Yes                                                                           | 1.001 | 0.000            | 3.230  | 0.001 | 1.000     | 1.001     |
| Unknown                                                                       | 1.000 | 0.001            | 0.210  | 0.837 | 0.999     | 1.001     |
| same physician#months after release                                           |       |                  |        |       |           |           |
| Yes                                                                           | 1.000 | 0.000            | -1.200 | 0.230 | 0.999     | 1.000     |
| Unknown                                                                       | 1.001 | 0.001            | 1.770  | 0.077 | 1.000     | 1.003     |
| same physician#binary post-release                                            |       |                  |        |       |           |           |
| Yes                                                                           | 0.996 | 0.005            | -0.760 | 0.445 | 0.986     | 1.006     |
| Unknown                                                                       | 0.983 | 0.011            | -1.510 | 0.132 | 0.961     | 1.005     |
| state                                                                         |       |                  |        |       |           |           |
| AL                                                                            | 1.086 | 0.032            | 2.830  | 0.005 | 1.026     | 1.150     |
| AR                                                                            | 1.058 | 0.031            | 1.930  | 0.053 | 0.999     | 1.120     |
| AZ                                                                            | 0.999 | 0.029            | -0.020 | 0.983 | 0.945     | 1.057     |
| CA                                                                            | 1.009 | 0.029            | 0.330  | 0.744 | 0.954     | 1.068     |
| CO                                                                            | 0.971 | 0.028            | -1.040 | 0.300 | 0.917     | 1.027     |
| CT                                                                            | 1.010 | 0.030            | 0.330  | 0.744 | 0.952     | 1.071     |
| DC                                                                            | 0.976 | 0.033            | -0.710 | 0.478 | 0.914     | 1.043     |
| DE                                                                            | 1.001 | 0.036            | 0.020  | 0.984 | 0.932     | 1.075     |
| FL                                                                            | 1.032 | 0.030            | 1.100  | 0.272 | 0.976     | 1.091     |
| GA                                                                            | 0.999 | 0.029            | -0.050 | 0.961 | 0.944     | 1.057     |
| HI                                                                            | 1.139 | 0.063            | 2.370  | 0.018 | 1.023     | 1.270     |
| IA                                                                            | 0.999 | 0.029            | -0.040 | 0.969 | 0.943     | 1.058     |
| ID                                                                            | 0.944 | 0.033            | -1.660 | 0.097 | 0.883     | 1.010     |
| IL                                                                            | 1.021 | 0.029            | 0.710  | 0.481 | 0.965     | 1.080     |
| IN                                                                            | 1.028 | 0.030            | 0.960  | 0.335 | 0.972     | 1.088     |
| KS                                                                            | 1.035 | 0.031            | 1.180  | 0.239 | 0.977     | 1.097     |
| KY                                                                            | 1.023 | 0.031            | 0.770  | 0.439 | 0.965     | 1.085     |
| LA                                                                            | 1.026 | 0.030            | 0.900  | 0.367 | 0.970     | 1.086     |
| MA                                                                            | 1.001 | 0.030            | 0.050  | 0.964 | 0.944     | 1.062     |

| Outcome: number of overlap days<br>Population: Commercial short-term episodes | IRR   | Robust Std. Err. | z      | P>z   | [95 Conf. | Interval] |
|-------------------------------------------------------------------------------|-------|------------------|--------|-------|-----------|-----------|
| MD                                                                            | 1.017 | 0.029            | 0.580  | 0.560 | 0.961     | 1.077     |
| ME                                                                            | 0.994 | 0.041            | -0.140 | 0.892 | 0.917     | 1.078     |
| MI                                                                            | 1.056 | 0.031            | 1.870  | 0.062 | 0.997     | 1.118     |
| MN                                                                            | 0.946 | 0.028            | -1.910 | 0.056 | 0.893     | 1.002     |
| MO                                                                            | 1.038 | 0.030            | 1.290  | 0.198 | 0.981     | 1.098     |
| MS                                                                            | 1.049 | 0.031            | 1.620  | 0.104 | 0.990     | 1.110     |
| MT                                                                            | 1.006 | 0.040            | 0.150  | 0.884 | 0.931     | 1.087     |
| NC                                                                            | 1.009 | 0.029            | 0.330  | 0.745 | 0.954     | 1.068     |
| ND                                                                            | 0.960 | 0.038            | -1.030 | 0.302 | 0.889     | 1.037     |
| NE                                                                            | 0.984 | 0.029            | -0.550 | 0.579 | 0.929     | 1.042     |
| NH                                                                            | 0.978 | 0.032            | -0.680 | 0.494 | 0.916     | 1.043     |
| NJ                                                                            | 1.035 | 0.030            | 1.180  | 0.239 | 0.977     | 1.096     |
| NM                                                                            | 1.004 | 0.031            | 0.140  | 0.886 | 0.945     | 1.068     |
| NV                                                                            | 1.051 | 0.031            | 1.670  | 0.095 | 0.991     | 1.114     |
| NY                                                                            | 1.040 | 0.030            | 1.350  | 0.178 | 0.982     | 1.101     |
| OH                                                                            | 1.005 | 0.029            | 0.170  | 0.864 | 0.950     | 1.063     |
| OK                                                                            | 1.013 | 0.030            | 0.440  | 0.658 | 0.957     | 1.073     |
| OR                                                                            | 0.881 | 0.027            | -4.090 | 0.000 | 0.829     | 0.936     |
| PA                                                                            | 1.033 | 0.030            | 1.110  | 0.265 | 0.976     | 1.094     |
| RI                                                                            | 1.023 | 0.031            | 0.750  | 0.451 | 0.964     | 1.086     |
| SC                                                                            | 1.055 | 0.031            | 1.840  | 0.065 | 0.997     | 1.118     |
| SD                                                                            | 0.971 | 0.041            | -0.690 | 0.493 | 0.894     | 1.055     |
| TN                                                                            | 1.039 | 0.030            | 1.320  | 0.186 | 0.982     | 1.100     |
| TX                                                                            | 1.005 | 0.029            | 0.180  | 0.856 | 0.950     | 1.063     |
| UT                                                                            | 0.989 | 0.029            | -0.390 | 0.697 | 0.933     | 1.048     |
| VA                                                                            | 1.004 | 0.029            | 0.130  | 0.896 | 0.948     | 1.063     |
| VT                                                                            | 0.944 | 0.059            | -0.920 | 0.360 | 0.835     | 1.068     |
| WA                                                                            | 0.914 | 0.027            | -2.990 | 0.003 | 0.862     | 0.970     |
| WI                                                                            | 0.975 | 0.028            | -0.860 | 0.389 | 0.922     | 1.032     |
| WV                                                                            | 1.054 | 0.034            | 1.630  | 0.103 | 0.990     | 1.122     |
| WY                                                                            | 0.956 | 0.037            | -1.160 | 0.247 | 0.886     | 1.032     |
| Unknown/other                                                                 | 1.026 | 0.032            | 0.800  | 0.423 | 0.964     | 1.091     |
|                                                                               |       |                  |        |       |           |           |
| race/ethnicity                                                                |       |                  |        |       |           |           |
| B                                                                             | 0.988 | 0.003            | -4.270 | 0.000 | 0.982     | 0.993     |
| H                                                                             | 0.996 | 0.003            | -1.390 | 0.165 | 0.990     | 1.002     |
| A                                                                             | 0.957 | 0.006            | -6.880 | 0.000 | 0.945     | 0.969     |
| U                                                                             | 0.997 | 0.004            | -0.700 | 0.486 | 0.989     | 1.005     |
|                                                                               |       |                  |        |       |           |           |
| elix_chf                                                                      | 1.001 | 0.007            | 0.100  | 0.920 | 0.987     | 1.015     |
| elix_arrhythmia                                                               | 0.993 | 0.005            | -1.600 | 0.110 | 0.984     | 1.002     |

| Outcome: number of overlap days<br>Population: Commercial short-term episodes | IRR    | Robust Std. Err. | z      | P>z   | [95 Conf. | Interval] |
|-------------------------------------------------------------------------------|--------|------------------|--------|-------|-----------|-----------|
| elix_valvular                                                                 | 0.990  | 0.007            | -1.300 | 0.193 | 0.976     | 1.005     |
| elix_pulm_circ                                                                | 0.997  | 0.010            | -0.290 | 0.770 | 0.978     | 1.017     |
| elix_periph_vasc                                                              | 0.993  | 0.008            | -0.890 | 0.376 | 0.979     | 1.008     |
| elix_htn_uncomp                                                               | 1.005  | 0.002            | 2.370  | 0.018 | 1.001     | 1.009     |
| elix_htn_comp                                                                 | 1.003  | 0.008            | 0.350  | 0.730 | 0.986     | 1.020     |
| elix_oth_neuro                                                                | 1.037  | 0.005            | 7.330  | 0.000 | 1.027     | 1.048     |
| elix_chron_pulm                                                               | 1.017  | 0.003            | 5.130  | 0.000 | 1.010     | 1.023     |
| elix_pep_ulcer                                                                | 1.012  | 0.016            | 0.730  | 0.464 | 0.981     | 1.043     |
| elix_dm_wo_cc                                                                 | 0.995  | 0.003            | -1.420 | 0.157 | 0.988     | 1.002     |
| elix_dm_w_cc                                                                  | 1.003  | 0.005            | 0.670  | 0.505 | 0.993     | 1.014     |
| elix_paralysis                                                                | 1.014  | 0.012            | 1.130  | 0.260 | 0.990     | 1.038     |
| elix_renal                                                                    | 1.003  | 0.008            | 0.360  | 0.721 | 0.988     | 1.018     |
| elix_solid_tumor_wo_mets                                                      | 1.004  | 0.007            | 0.510  | 0.607 | 0.989     | 1.019     |
| elix_liver                                                                    | 1.009  | 0.007            | 1.400  | 0.162 | 0.996     | 1.023     |
| elix_met_cancer                                                               | 0.949  | 0.030            | -1.660 | 0.097 | 0.891     | 1.010     |
| elix_hiv_aids                                                                 | 1.060  | 0.015            | 4.250  | 0.000 | 1.032     | 1.090     |
| elix_rheum_arth_coll                                                          | 0.992  | 0.005            | -1.800 | 0.071 | 0.983     | 1.001     |
| elix_hypothyroid                                                              | 1.004  | 0.003            | 1.040  | 0.298 | 0.997     | 1.010     |
| elix_lymphoma                                                                 | 1.019  | 0.022            | 0.880  | 0.380 | 0.977     | 1.062     |
| elix_coagulopathy                                                             | 0.994  | 0.009            | -0.640 | 0.523 | 0.977     | 1.012     |
| elix_obesity                                                                  | 0.977  | 0.004            | -5.470 | 0.000 | 0.969     | 0.985     |
| elix_weight_loss                                                              | 0.992  | 0.010            | -0.850 | 0.397 | 0.973     | 1.011     |
| elix_fluid_electrolyte                                                        | 0.986  | 0.005            | -2.730 | 0.006 | 0.977     | 0.996     |
| elix_blood_loss_anemia                                                        | 0.978  | 0.015            | -1.380 | 0.166 | 0.949     | 1.009     |
| elix_deficiency_anemia                                                        | 1.022  | 0.008            | 2.980  | 0.003 | 1.008     | 1.037     |
| elix_alcohol                                                                  | 0.995  | 0.007            | -0.770 | 0.442 | 0.981     | 1.008     |
| elix_drug_abuse                                                               | 1.056  | 0.007            | 8.540  | 0.000 | 1.043     | 1.070     |
| elix_psychosis                                                                | 1.054  | 0.008            | 6.950  | 0.000 | 1.038     | 1.070     |
| elix_depression                                                               | 1.068  | 0.002            | 32.360 | 0.000 | 1.064     | 1.072     |
| less than 6 months prior insurance coverage                                   | 1.011  | 0.002            | 5.320  | 0.000 | 1.007     | 1.016     |
|                                                                               |        |                  |        |       |           |           |
| female                                                                        | 1.019  | 0.002            | 11.390 | 0.000 | 1.016     | 1.022     |
| age                                                                           | 1.003  | 0.000            | 47.370 | 0.000 | 1.003     | 1.003     |
| _cons                                                                         | 0.665  | 0.077            | -3.510 | 0.000 | 0.530     | 0.835     |
| ln(op_days)                                                                   | 1.000  | (exposure)       |        |       |           |           |
| /lnalpha                                                                      | -2.499 | 0.010            |        |       | -2.518    | -2.480    |
| alpha                                                                         | 0.082  | 0.001            |        |       | 0.081     | 0.084     |

Observations: 583,020 person-months contributed by 344,179 individuals

eTable 12. Regression Results: Intensity of Coprescription Among Commercial Beneficiaries With and Without Same Physician Prescribing Opioids and Benzodiazepines: Long-term Opioid Use Episodes

| Outcome: number of overlap days<br>Population: Commercial, long-term episodes | IRR   | Robust Std. Err. | z      | P>z   | [95 Conf. Interval] |  |
|-------------------------------------------------------------------------------|-------|------------------|--------|-------|---------------------|--|
| Same physician prescribing both medications                                   |       |                  |        |       |                     |  |
| Yes                                                                           | 0.912 | 0.346            | -0.240 | 0.808 | 0.434 1.918         |  |
| Unknown                                                                       | 0.237 | 0.320            | -1.060 | 0.287 | 0.017 3.357         |  |
| Spline components                                                             |       |                  |        |       |                     |  |
| months before release                                                         | 1.001 | 0.000            | 1.200  | 0.229 | 1.000 1.001         |  |
| months after release                                                          | 0.999 | 0.001            | -1.310 | 0.190 | 0.998 1.000         |  |
| binary post-release                                                           | 1.007 | 0.007            | 1.060  | 0.287 | 0.994 1.021         |  |
| same physician#months before release                                          |       |                  |        |       |                     |  |
| Yes                                                                           | 1.000 | 0.001            | 0.370  | 0.709 | 0.999 1.001         |  |
| Unknown                                                                       | 1.002 | 0.002            | 1.030  | 0.303 | 0.998 1.006         |  |
| same physician#months after release                                           |       |                  |        |       |                     |  |
| Yes                                                                           | 1.000 | 0.000            | -1.200 | 0.230 | 0.999 1.000         |  |
| Unknown                                                                       | 1.001 | 0.001            | 1.770  | 0.077 | 1.000 1.003         |  |
| same physician#binary post-release                                            |       |                  |        |       |                     |  |
| Yes                                                                           | 1.001 | 0.001            | 0.990  | 0.323 | 0.999 1.002         |  |
| Unknown                                                                       | 0.999 | 0.003            | -0.320 | 0.747 | 0.994 1.005         |  |
| state                                                                         |       |                  |        |       |                     |  |
| AL                                                                            | 1.387 | 0.171            | 2.650  | 0.008 | 1.088 1.766         |  |
| AR                                                                            | 1.340 | 0.166            | 2.370  | 0.018 | 1.052 1.707         |  |
| AZ                                                                            | 1.265 | 0.156            | 1.910  | 0.057 | 0.993 1.610         |  |
| CA                                                                            | 1.295 | 0.160            | 2.100  | 0.036 | 1.017 1.648         |  |
| CO                                                                            | 1.246 | 0.154            | 1.780  | 0.075 | 0.978 1.587         |  |
| CT                                                                            | 1.260 | 0.159            | 1.830  | 0.067 | 0.984 1.614         |  |
| DC                                                                            | 1.273 | 0.176            | 1.740  | 0.081 | 0.970 1.670         |  |
| DE                                                                            | 1.303 | 0.174            | 1.980  | 0.048 | 1.003 1.692         |  |
| FL                                                                            | 1.351 | 0.166            | 2.450  | 0.014 | 1.062 1.719         |  |
| GA                                                                            | 1.316 | 0.162            | 2.230  | 0.026 | 1.033 1.676         |  |
| HI                                                                            | 1.364 | 0.218            | 1.950  | 0.051 | 0.998 1.865         |  |
| IA                                                                            | 1.306 | 0.163            | 2.140  | 0.033 | 1.022 1.668         |  |
| ID                                                                            | 1.310 | 0.167            | 2.130  | 0.034 | 1.021 1.681         |  |
| IL                                                                            | 1.344 | 0.165            | 2.400  | 0.016 | 1.056 1.711         |  |
| IN                                                                            | 1.339 | 0.165            | 2.370  | 0.018 | 1.051 1.704         |  |
| KS                                                                            | 1.298 | 0.162            | 2.090  | 0.036 | 1.017 1.656         |  |
| KY                                                                            | 1.391 | 0.172            | 2.670  | 0.008 | 1.092 1.773         |  |
| LA                                                                            | 1.356 | 0.167            | 2.470  | 0.014 | 1.065 1.726         |  |
| MA                                                                            | 1.302 | 0.165            | 2.080  | 0.038 | 1.015 1.669         |  |

| Outcome: number of overlap days<br>Population: Commercial, long-term episodes | IRR   | Robust Std. Err. | z      | P>z   | [95 Conf. | Interval] |
|-------------------------------------------------------------------------------|-------|------------------|--------|-------|-----------|-----------|
| MD                                                                            | 1.326 | 0.164            | 2.280  | 0.023 | 1.041     | 1.691     |
| ME                                                                            | 1.196 | 0.197            | 1.090  | 0.277 | 0.866     | 1.651     |
| MI                                                                            | 1.335 | 0.165            | 2.340  | 0.019 | 1.048     | 1.700     |
| MN                                                                            | 1.230 | 0.153            | 1.670  | 0.095 | 0.965     | 1.569     |
| MO                                                                            | 1.314 | 0.162            | 2.210  | 0.027 | 1.032     | 1.672     |
| MS                                                                            | 1.365 | 0.169            | 2.520  | 0.012 | 1.072     | 1.739     |
| MT                                                                            | 1.306 | 0.183            | 1.910  | 0.056 | 0.993     | 1.719     |
| NC                                                                            | 1.333 | 0.164            | 2.330  | 0.020 | 1.047     | 1.697     |
| ND                                                                            | 1.319 | 0.170            | 2.150  | 0.031 | 1.025     | 1.697     |
| NE                                                                            | 1.302 | 0.162            | 2.120  | 0.034 | 1.020     | 1.662     |
| NH                                                                            | 1.216 | 0.173            | 1.370  | 0.171 | 0.919     | 1.608     |
| NJ                                                                            | 1.328 | 0.165            | 2.280  | 0.022 | 1.041     | 1.694     |
| NM                                                                            | 1.302 | 0.165            | 2.090  | 0.037 | 1.017     | 1.668     |
| NV                                                                            | 1.342 | 0.168            | 2.360  | 0.018 | 1.051     | 1.715     |
| NY                                                                            | 1.309 | 0.162            | 2.170  | 0.030 | 1.027     | 1.669     |
| OH                                                                            | 1.319 | 0.163            | 2.250  | 0.024 | 1.036     | 1.680     |
| OK                                                                            | 1.338 | 0.165            | 2.360  | 0.018 | 1.051     | 1.705     |
| OR                                                                            | 0.995 | 0.134            | -0.040 | 0.971 | 0.765     | 1.295     |
| PA                                                                            | 1.348 | 0.167            | 2.410  | 0.016 | 1.058     | 1.718     |
| RI                                                                            | 1.303 | 0.165            | 2.090  | 0.036 | 1.017     | 1.669     |
| SC                                                                            | 1.315 | 0.163            | 2.210  | 0.027 | 1.031     | 1.677     |
| SD                                                                            | 1.184 | 0.200            | 1.000  | 0.316 | 0.851     | 1.648     |
| TN                                                                            | 1.348 | 0.166            | 2.420  | 0.015 | 1.059     | 1.717     |
| TX                                                                            | 1.303 | 0.160            | 2.150  | 0.031 | 1.024     | 1.658     |
| UT                                                                            | 1.272 | 0.159            | 1.930  | 0.054 | 0.996     | 1.624     |
| VA                                                                            | 1.258 | 0.156            | 1.850  | 0.064 | 0.987     | 1.604     |
| VT                                                                            | 1.465 | 0.195            | 2.870  | 0.004 | 1.128     | 1.902     |
| WA                                                                            | 1.168 | 0.146            | 1.240  | 0.214 | 0.914     | 1.493     |
| WI                                                                            | 1.290 | 0.159            | 2.060  | 0.039 | 1.012     | 1.643     |
| WV                                                                            | 1.340 | 0.175            | 2.250  | 0.025 | 1.038     | 1.730     |
| WY                                                                            | 1.306 | 0.188            | 1.860  | 0.063 | 0.985     | 1.732     |
| Unknown/other                                                                 | 1.323 | 0.166            | 2.230  | 0.026 | 1.035     | 1.692     |
|                                                                               |       |                  |        |       |           |           |
| race/ethnicity                                                                |       |                  |        |       |           |           |
| B                                                                             | 0.981 | 0.007            | -2.700 | 0.007 | 0.968     | 0.995     |
| H                                                                             | 0.990 | 0.008            | -1.320 | 0.188 | 0.975     | 1.005     |
| A                                                                             | 0.975 | 0.024            | -1.030 | 0.304 | 0.930     | 1.023     |
| U                                                                             | 0.995 | 0.011            | -0.470 | 0.638 | 0.973     | 1.017     |
|                                                                               |       |                  |        |       |           |           |
| elix_chf                                                                      | 0.977 | 0.014            | -1.680 | 0.093 | 0.950     | 1.004     |
| elix_arrhythmia                                                               | 1.008 | 0.008            | 0.940  | 0.347 | 0.992     | 1.024     |



| Outcome: number of overlap days<br>Population: Commercial, long-term episodes | IRR    | Robust Std. Err. | z      | P>z   | [95 Conf. | Interval] |
|-------------------------------------------------------------------------------|--------|------------------|--------|-------|-----------|-----------|
| elix_valvular                                                                 | 0.991  | 0.014            | -0.620 | 0.535 | 0.963     | 1.020     |
| elix_pulm_circ                                                                | 0.982  | 0.021            | -0.870 | 0.386 | 0.942     | 1.023     |
| elix_periph_vasc                                                              | 0.957  | 0.014            | -3.000 | 0.003 | 0.930     | 0.985     |
| elix_htn_uncomp                                                               | 0.995  | 0.004            | -1.370 | 0.170 | 0.987     | 1.002     |
| elix_htn_comp                                                                 | 1.001  | 0.015            | 0.070  | 0.947 | 0.972     | 1.031     |
| elix_oth_neuro                                                                | 1.021  | 0.009            | 2.380  | 0.017 | 1.004     | 1.039     |
| elix_chron_pulm                                                               | 1.009  | 0.006            | 1.410  | 0.157 | 0.997     | 1.021     |
| elix_pep_ulcer                                                                | 0.990  | 0.023            | -0.430 | 0.664 | 0.947     | 1.036     |
| elix_dm_wo_cc                                                                 | 0.992  | 0.007            | -1.220 | 0.221 | 0.979     | 1.005     |
| elix_dm_w_cc                                                                  | 0.988  | 0.010            | -1.230 | 0.218 | 0.969     | 1.007     |
| elix_paralysis                                                                | 0.962  | 0.021            | -1.780 | 0.075 | 0.923     | 1.004     |
| elix_renal                                                                    | 1.017  | 0.015            | 1.100  | 0.273 | 0.987     | 1.047     |
| elix_solid_tumor_wo_mets                                                      | 0.958  | 0.031            | -1.310 | 0.189 | 0.899     | 1.021     |
| elix_liver                                                                    | 0.999  | 0.011            | -0.100 | 0.924 | 0.977     | 1.021     |
| elix_met_cancer                                                               | 0.654  | 0.173            | -1.600 | 0.109 | 0.389     | 1.099     |
| elix_hiv_aids                                                                 | 1.063  | 0.029            | 2.260  | 0.024 | 1.008     | 1.122     |
| elix_rheum_arth_coll                                                          | 0.983  | 0.008            | -2.160 | 0.031 | 0.968     | 0.998     |
| elix_hypothyroid                                                              | 0.989  | 0.008            | -1.470 | 0.140 | 0.974     | 1.004     |
| elix_lymphoma                                                                 | 0.925  | 0.102            | -0.700 | 0.482 | 0.745     | 1.149     |
| elix_coagulopathy                                                             | 1.009  | 0.015            | 0.570  | 0.569 | 0.980     | 1.038     |
| elix_obesity                                                                  | 0.983  | 0.007            | -2.250 | 0.024 | 0.969     | 0.998     |
| elix_weight_loss                                                              | 0.981  | 0.015            | -1.270 | 0.206 | 0.953     | 1.010     |
| elix_fluid_electrolyte                                                        | 0.989  | 0.008            | -1.350 | 0.178 | 0.974     | 1.005     |
| elix_blood_loss_anemia                                                        | 0.999  | 0.027            | -0.030 | 0.975 | 0.948     | 1.053     |
| elix_deficiency_anemia                                                        | 1.031  | 0.014            | 2.290  | 0.022 | 1.004     | 1.058     |
| elix_alcohol                                                                  | 0.991  | 0.014            | -0.630 | 0.528 | 0.965     | 1.019     |
| elix_drug_abuse                                                               | 0.992  | 0.009            | -0.970 | 0.330 | 0.975     | 1.009     |
| elix_psychosis                                                                | 1.060  | 0.019            | 3.190  | 0.001 | 1.023     | 1.099     |
| elix_depression                                                               | 1.052  | 0.004            | 11.990 | 0.000 | 1.043     | 1.061     |
| less than 6 months prior insurance coverage                                   | 0.998  | 0.006            | -0.330 | 0.742 | 0.987     | 1.010     |
|                                                                               |        |                  |        |       |           |           |
| female                                                                        | 0.993  | 0.004            | -1.650 | 0.099 | 0.985     | 1.001     |
| age                                                                           | 1.001  | 0.000            | 6.410  | 0.000 | 1.001     | 1.002     |
| _cons                                                                         | 0.379  | 0.127            | -2.890 | 0.004 | 0.197     | 0.732     |
| ln(op_days)                                                                   | 1.000  | (exposure)       |        |       |           |           |
| /lnalpha                                                                      | -1.919 | 0.015            |        |       | -1.948    | -1.889    |
| alpha                                                                         | 0.147  | 0.002            |        |       | 0.142     | 0.151     |
| Observations: 168,810 person-months contributed by 22,290 individuals         |        |                  |        |       |           |           |

eTable 13. Regression Results: Intensity of Coprescription Among Medicare Advantage Beneficiaries With and Without Same Physician Prescribing Opioids and Benzodiazepines—Short-term Episodes

| Outcome: number of overlap days<br>Population: Medicare Advantage short-term episodes | IRR   | Robust Std. Err. | z       | P>z   | [95 Conf. | Interval] |
|---------------------------------------------------------------------------------------|-------|------------------|---------|-------|-----------|-----------|
| Same physician prescribing both medications                                           |       |                  |         |       |           |           |
| Yes                                                                                   | 0.848 | 0.147            | -0.950  | 0.342 | 0.603     | 1.192     |
| Unknown                                                                               | 0.991 | 0.342            | -0.030  | 0.979 | 0.503     | 1.950     |
| Spline components                                                                     |       |                  |         |       |           |           |
| months before release                                                                 | 1.000 | 0.000            | 0.870   | 0.383 | 1.000     | 1.001     |
| months after release                                                                  | 1.000 | 0.000            | -0.160  | 0.870 | 0.999     | 1.001     |
| binary post-release                                                                   | 0.999 | 0.004            | -0.290  | 0.769 | 0.991     | 1.007     |
| same physician#months before release                                                  |       |                  |         |       |           |           |
| Yes                                                                                   | 1.000 | 0.000            | 1.050   | 0.292 | 1.000     | 1.001     |
| Unknown                                                                               | 1.000 | 0.001            | 0.000   | 0.996 | 0.999     | 1.001     |
| same physician#months after release                                                   |       |                  |         |       |           |           |
| Yes                                                                                   | 1.000 | 0.000            | 0.890   | 0.375 | 1.000     | 1.001     |
| Unknown                                                                               | 1.000 | 0.001            | 0.020   | 0.980 | 0.999     | 1.001     |
| same physician#binary post-release                                                    |       |                  |         |       |           |           |
| Yes                                                                                   | 0.996 | 0.005            | -0.820  | 0.413 | 0.986     | 1.006     |
| Unknown                                                                               | 1.003 | 0.009            | 0.290   | 0.773 | 0.984     | 1.021     |
| state                                                                                 |       |                  |         |       |           |           |
| AL                                                                                    | 0.910 | 0.005            | -17.470 | 0.000 | 0.900     | 0.920     |
| AR                                                                                    | 0.914 | 0.006            | -13.600 | 0.000 | 0.902     | 0.926     |
| AZ                                                                                    | 0.890 | 0.007            | -14.980 | 0.000 | 0.877     | 0.904     |
| CA                                                                                    | 0.858 | 0.007            | -18.380 | 0.000 | 0.844     | 0.872     |
| CO                                                                                    | 0.867 | 0.010            | -12.410 | 0.000 | 0.847     | 0.887     |
| CT                                                                                    | 0.881 | 0.006            | -18.070 | 0.000 | 0.869     | 0.894     |
| DC                                                                                    | 0.883 | 0.018            | -6.040  | 0.000 | 0.848     | 0.919     |
| DE                                                                                    | 0.819 | 0.040            | -4.050  | 0.000 | 0.743     | 0.902     |
| FL                                                                                    | 0.907 | 0.004            | -22.860 | 0.000 | 0.900     | 0.915     |
| GA                                                                                    | 0.881 | 0.004            | -26.430 | 0.000 | 0.873     | 0.889     |
| HI                                                                                    | 0.890 | 0.011            | -9.760  | 0.000 | 0.869     | 0.911     |
| IA                                                                                    | 0.875 | 0.008            | -14.540 | 0.000 | 0.860     | 0.891     |
| ID                                                                                    | 0.852 | 0.011            | -12.840 | 0.000 | 0.832     | 0.873     |
| IL                                                                                    | 0.885 | 0.005            | -23.500 | 0.000 | 0.876     | 0.894     |
| IN                                                                                    | 0.885 | 0.005            | -20.550 | 0.000 | 0.875     | 0.895     |
| KS                                                                                    | 0.872 | 0.015            | -7.950  | 0.000 | 0.843     | 0.902     |
| KY                                                                                    | 0.898 | 0.012            | -7.760  | 0.000 | 0.874     | 0.923     |
| LA                                                                                    | 0.868 | 0.019            | -6.520  | 0.000 | 0.832     | 0.906     |

| Outcome: number of overlap days<br>Population: Medicare Advantage short-term episodes | IRR   | Robust Std. Err. | z       | P>z   | [95 Conf. Interval] |
|---------------------------------------------------------------------------------------|-------|------------------|---------|-------|---------------------|
| MA                                                                                    | 0.874 | 0.007            | -15.910 | 0.000 | 0.860 0.889         |
| MD                                                                                    | 0.905 | 0.018            | -5.180  | 0.000 | 0.871 0.940         |
| ME                                                                                    | 0.868 | 0.013            | -9.720  | 0.000 | 0.844 0.893         |
| MI                                                                                    | 0.881 | 0.026            | -4.350  | 0.000 | 0.832 0.933         |
| MN                                                                                    | 0.833 | 0.007            | -23.070 | 0.000 | 0.820 0.846         |
| MO                                                                                    | 0.894 | 0.005            | -22.020 | 0.000 | 0.885 0.903         |
| MS                                                                                    | 0.913 | 0.031            | -2.710  | 0.007 | 0.855 0.975         |
| MT                                                                                    | 0.867 | 0.038            | -3.250  | 0.001 | 0.796 0.945         |
| NC                                                                                    | 0.887 | 0.004            | -26.490 | 0.000 | 0.879 0.895         |
| ND                                                                                    | 0.862 | 0.017            | -7.670  | 0.000 | 0.830 0.896         |
| NE                                                                                    | 0.884 | 0.009            | -11.760 | 0.000 | 0.866 0.903         |
| NH                                                                                    | 0.860 | 0.015            | -8.490  | 0.000 | 0.831 0.891         |
| NJ                                                                                    | 0.904 | 0.005            | -18.160 | 0.000 | 0.894 0.914         |
| NM                                                                                    | 0.870 | 0.008            | -15.550 | 0.000 | 0.855 0.885         |
| NV                                                                                    | 0.874 | 0.034            | -3.420  | 0.001 | 0.810 0.944         |
| NY                                                                                    | 0.874 | 0.005            | -25.530 | 0.000 | 0.865 0.883         |
| OH                                                                                    | 0.905 | 0.005            | -18.110 | 0.000 | 0.895 0.915         |
| OK                                                                                    | 0.902 | 0.026            | -3.570  | 0.000 | 0.853 0.955         |
| OR                                                                                    | 0.827 | 0.011            | -13.830 | 0.000 | 0.805 0.850         |
| PA                                                                                    | 0.875 | 0.008            | -14.050 | 0.000 | 0.858 0.891         |
| RI                                                                                    | 0.879 | 0.008            | -14.950 | 0.000 | 0.864 0.894         |
| SC                                                                                    | 0.901 | 0.005            | -19.050 | 0.000 | 0.892 0.911         |
| SD                                                                                    | 0.862 | 0.018            | -7.230  | 0.000 | 0.828 0.898         |
| TN                                                                                    | 0.914 | 0.005            | -15.610 | 0.000 | 0.904 0.924         |
| TX                                                                                    | 0.884 | 0.004            | -24.250 | 0.000 | 0.876 0.893         |
| UT                                                                                    | 0.865 | 0.006            | -22.040 | 0.000 | 0.854 0.877         |
| VA                                                                                    | 0.910 | 0.006            | -14.970 | 0.000 | 0.899 0.921         |
| VT                                                                                    | 0.871 | 0.017            | -6.950  | 0.000 | 0.838 0.906         |
| WA                                                                                    | 0.843 | 0.008            | -17.430 | 0.000 | 0.827 0.859         |
| WI                                                                                    | 0.871 | 0.005            | -25.800 | 0.000 | 0.862 0.880         |
| WV                                                                                    | 0.917 | 0.028            | -2.840  | 0.004 | 0.863 0.973         |
| WY                                                                                    | 0.787 | 0.038            | -4.960  | 0.000 | 0.715 0.865         |
| Unknown/other                                                                         | 0.869 | 0.020            | -6.140  | 0.000 | 0.831 0.909         |
|                                                                                       |       |                  |         |       |                     |
| race/ethnicity                                                                        |       |                  |         |       |                     |
| B                                                                                     | 0.989 | 0.002            | -4.850  | 0.000 | 0.985 0.994         |
| H                                                                                     | 1.010 | 0.002            | 4.160   | 0.000 | 1.005 1.014         |
| A                                                                                     | 1.003 | 0.007            | 0.510   | 0.612 | 0.990 1.017         |
| U                                                                                     | 0.997 | 0.003            | -0.870  | 0.386 | 0.991 1.004         |
|                                                                                       |       |                  |         |       |                     |
| elix_chf                                                                              | 0.996 | 0.003            | -1.430  | 0.153 | 0.990 1.002         |

| Outcome: number of overlap days<br>Population: Medicare Advantage short-term episodes | IRR    | Robust Std. Err. | z       | P>z   | [95 Conf. Interval] |
|---------------------------------------------------------------------------------------|--------|------------------|---------|-------|---------------------|
| elix_arrhythmia                                                                       | 0.992  | 0.002            | -3.190  | 0.001 | 0.987 0.997         |
| elix_valvular                                                                         | 0.997  | 0.004            | -0.780  | 0.433 | 0.989 1.005         |
| elix_pulm_circ                                                                        | 1.003  | 0.005            | 0.560   | 0.573 | 0.993 1.013         |
| elix_periph_vasc                                                                      | 0.992  | 0.003            | -2.440  | 0.015 | 0.986 0.998         |
| elix_htn_uncomp                                                                       | 0.994  | 0.001            | -4.420  | 0.000 | 0.991 0.996         |
| elix_htn_comp                                                                         | 0.991  | 0.004            | -2.310  | 0.021 | 0.984 0.999         |
| elix_oth_neuro                                                                        | 0.998  | 0.003            | -0.640  | 0.523 | 0.993 1.004         |
| elix_chron_pulm                                                                       | 1.006  | 0.002            | 2.960   | 0.003 | 1.002 1.009         |
| elix_pep_ulcer                                                                        | 0.999  | 0.010            | -0.080  | 0.936 | 0.980 1.019         |
| elix_dm_wo_cc                                                                         | 0.988  | 0.002            | -5.950  | 0.000 | 0.984 0.992         |
| elix_dm_w_cc                                                                          | 0.990  | 0.003            | -3.790  | 0.000 | 0.985 0.995         |
| elix_paralysis                                                                        | 0.987  | 0.008            | -1.690  | 0.091 | 0.973 1.002         |
| elix_renal                                                                            | 0.999  | 0.003            | -0.360  | 0.718 | 0.993 1.005         |
| elix_solid_tumor_wo_mets                                                              | 0.998  | 0.005            | -0.380  | 0.701 | 0.988 1.008         |
| elix_liver                                                                            | 0.999  | 0.005            | -0.160  | 0.874 | 0.990 1.009         |
| elix_met_cancer                                                                       | 1.023  | 0.020            | 1.170   | 0.242 | 0.985 1.063         |
| elix_hiv_aids                                                                         | 1.029  | 0.011            | 2.730   | 0.006 | 1.008 1.050         |
| elix_rheum_arth_coll                                                                  | 0.975  | 0.004            | -6.800  | 0.000 | 0.968 0.982         |
| elix_hypothyroid                                                                      | 0.998  | 0.002            | -0.900  | 0.366 | 0.993 1.003         |
| elix_lymphoma                                                                         | 1.008  | 0.016            | 0.490   | 0.626 | 0.976 1.041         |
| elix_coagulopathy                                                                     | 0.996  | 0.006            | -0.620  | 0.536 | 0.985 1.008         |
| elix_obesity                                                                          | 0.981  | 0.004            | -5.310  | 0.000 | 0.974 0.988         |
| elix_weight_loss                                                                      | 0.982  | 0.005            | -3.670  | 0.000 | 0.972 0.991         |
| elix_fluid_electrolyte                                                                | 0.991  | 0.003            | -2.900  | 0.004 | 0.986 0.997         |
| elix_blood_loss_anemia                                                                | 0.993  | 0.009            | -0.770  | 0.442 | 0.977 1.010         |
| elix_deficiency_anemia                                                                | 1.007  | 0.004            | 1.550   | 0.121 | 0.998 1.015         |
| elix_alcohol                                                                          | 0.981  | 0.006            | -3.070  | 0.002 | 0.969 0.993         |
| elix_drug_abuse                                                                       | 1.019  | 0.005            | 3.870   | 0.000 | 1.009 1.029         |
| elix_psychosis                                                                        | 1.012  | 0.004            | 3.130   | 0.002 | 1.005 1.020         |
| elix_depression                                                                       | 1.024  | 0.002            | 12.840  | 0.000 | 1.020 1.027         |
| less than 6 months prior insurance coverage                                           | 1.001  | 0.002            | 0.580   | 0.564 | 0.997 1.005         |
|                                                                                       |        |                  |         |       |                     |
| female                                                                                | 1.004  | 0.002            | 2.500   | 0.012 | 1.001 1.007         |
| age                                                                                   | 0.999  | 0.000            | -16.970 | 0.000 | 0.999 0.999         |
| _cons                                                                                 | 0.887  | 0.121            | -0.880  | 0.380 | 0.679 1.159         |
| ln(op_days)                                                                           | 1.000  | (exposure)       |         |       |                     |
| /lnalpha                                                                              | -2.826 | 0.013            |         |       | -2.851 -2.801       |
| alpha                                                                                 | 0.059  | 0.001            |         |       | 0.058 0.061         |

Observations: 454,771 person-months contributed by 193,656 individuals

eTable 14. Regression Results: Intensity of Coprescription Among Medicare Advantage Beneficiaries With and Without Same Physician Prescribing Opioids and Benzodiazepines—Long-term Episodes

| Outcome: number of overlap days<br>Population: Medicare Advantage long-term episodes | IRR   | Robust Std. Err. | z       | P>z   | [95 Conf. Interval] |  |
|--------------------------------------------------------------------------------------|-------|------------------|---------|-------|---------------------|--|
| Same physician prescribing both medications                                          |       |                  |         |       |                     |  |
| Yes                                                                                  | 0.816 | 0.268            | -0.620  | 0.536 | 0.428 1.555         |  |
| Unknown                                                                              | 1.116 | 0.781            | 0.160   | 0.876 | 0.283 4.400         |  |
| Spline components                                                                    |       |                  |         |       |                     |  |
| months before release                                                                | 1.000 | 0.000            | 1.170   | 0.242 | 1.000 1.001         |  |
| months after release                                                                 | 1.000 | 0.001            | 0.470   | 0.641 | 0.999 1.001         |  |
| binary post-release                                                                  | 0.989 | 0.006            | -1.750  | 0.081 | 0.977 1.001         |  |
| same physician#months before release                                                 |       |                  |         |       |                     |  |
| Yes                                                                                  | 1.000 | 0.000            | 0.730   | 0.466 | 0.999 1.001         |  |
| Unknown                                                                              | 1.000 | 0.001            | -0.200  | 0.845 | 0.998 1.002         |  |
| same physician#months after release                                                  |       |                  |         |       |                     |  |
| Yes                                                                                  | 1.000 | 0.001            | -0.270  | 0.787 | 0.999 1.001         |  |
| Unknown                                                                              | 1.001 | 0.001            | 0.650   | 0.516 | 0.998 1.003         |  |
| same physician#binary post-release                                                   |       |                  |         |       |                     |  |
| Yes                                                                                  | 1.008 | 0.007            | 1.090   | 0.274 | 0.994 1.023         |  |
| Unknown                                                                              | 1.021 | 0.014            | 1.530   | 0.125 | 0.994 1.048         |  |
| state                                                                                |       |                  |         |       |                     |  |
| AL                                                                                   | 0.926 | 0.007            | -10.540 | 0.000 | 0.913 0.939         |  |
| AR                                                                                   | 0.911 | 0.010            | -8.580  | 0.000 | 0.892 0.931         |  |
| AZ                                                                                   | 0.876 | 0.015            | -7.600  | 0.000 | 0.847 0.907         |  |
| CA                                                                                   | 0.850 | 0.016            | -8.830  | 0.000 | 0.820 0.881         |  |
| CO                                                                                   | 0.844 | 0.019            | -7.450  | 0.000 | 0.807 0.882         |  |
| CT                                                                                   | 0.875 | 0.012            | -9.480  | 0.000 | 0.851 0.900         |  |
| DC                                                                                   | 0.809 | 0.030            | -5.660  | 0.000 | 0.751 0.870         |  |
| DE                                                                                   | 0.858 | 0.056            | -2.370  | 0.018 | 0.755 0.974         |  |
| FL                                                                                   | 0.919 | 0.004            | -17.710 | 0.000 | 0.910 0.928         |  |
| GA                                                                                   | 0.897 | 0.006            | -15.750 | 0.000 | 0.885 0.909         |  |
| HI                                                                                   | 0.922 | 0.021            | -3.560  | 0.000 | 0.882 0.964         |  |
| IA                                                                                   | 0.917 | 0.015            | -5.220  | 0.000 | 0.887 0.947         |  |
| ID                                                                                   | 0.859 | 0.019            | -6.820  | 0.000 | 0.822 0.897         |  |
| IL                                                                                   | 0.898 | 0.008            | -11.840 | 0.000 | 0.882 0.914         |  |
| IN                                                                                   | 0.888 | 0.009            | -11.750 | 0.000 | 0.871 0.906         |  |
| KS                                                                                   | 0.856 | 0.025            | -5.360  | 0.000 | 0.809 0.906         |  |
| KY                                                                                   | 0.910 | 0.025            | -3.410  | 0.001 | 0.862 0.961         |  |

| Outcome: number of overlap days<br>Population: Medicare Advantage long-term episodes | IRR   | Robust Std. Err. | z       | P>z   | [95 Conf. Interval] |       |
|--------------------------------------------------------------------------------------|-------|------------------|---------|-------|---------------------|-------|
| LA                                                                                   | 0.921 | 0.042            | -1.800  | 0.072 | 0.842               | 1.008 |
| MA                                                                                   | 0.903 | 0.013            | -7.140  | 0.000 | 0.878               | 0.929 |
| MD                                                                                   | 0.885 | 0.030            | -3.560  | 0.000 | 0.828               | 0.947 |
| ME                                                                                   | 0.851 | 0.028            | -4.900  | 0.000 | 0.797               | 0.908 |
| MI                                                                                   | 0.776 | 0.061            | -3.220  | 0.001 | 0.665               | 0.906 |
| MN                                                                                   | 0.839 | 0.014            | -10.520 | 0.000 | 0.812               | 0.867 |
| MO                                                                                   | 0.896 | 0.007            | -13.280 | 0.000 | 0.881               | 0.911 |
| MS                                                                                   | 0.922 | 0.054            | -1.390  | 0.166 | 0.822               | 1.034 |
| MT                                                                                   | 0.930 | 0.054            | -1.250  | 0.212 | 0.830               | 1.042 |
| NC                                                                                   | 0.912 | 0.005            | -15.930 | 0.000 | 0.901               | 0.922 |
| ND                                                                                   | 0.902 | 0.035            | -2.700  | 0.007 | 0.837               | 0.972 |
| NE                                                                                   | 0.826 | 0.020            | -7.990  | 0.000 | 0.788               | 0.866 |
| NH                                                                                   | 0.841 | 0.034            | -4.280  | 0.000 | 0.776               | 0.910 |
| NJ                                                                                   | 0.901 | 0.010            | -9.800  | 0.000 | 0.882               | 0.920 |
| NM                                                                                   | 0.878 | 0.013            | -8.780  | 0.000 | 0.853               | 0.904 |
| NV                                                                                   | 0.820 | 0.064            | -2.550  | 0.011 | 0.704               | 0.955 |
| NY                                                                                   | 0.895 | 0.007            | -14.570 | 0.000 | 0.881               | 0.908 |
| OH                                                                                   | 0.912 | 0.008            | -10.810 | 0.000 | 0.897               | 0.928 |
| OK                                                                                   | 0.913 | 0.051            | -1.610  | 0.107 | 0.818               | 1.020 |
| OR                                                                                   | 0.776 | 0.029            | -6.890  | 0.000 | 0.722               | 0.834 |
| PA                                                                                   | 0.875 | 0.015            | -7.810  | 0.000 | 0.846               | 0.905 |
| RI                                                                                   | 0.871 | 0.014            | -8.560  | 0.000 | 0.843               | 0.899 |
| SC                                                                                   | 0.911 | 0.007            | -11.450 | 0.000 | 0.896               | 0.925 |
| SD                                                                                   | 0.889 | 0.032            | -3.280  | 0.001 | 0.829               | 0.954 |
| TN                                                                                   | 0.934 | 0.007            | -9.390  | 0.000 | 0.921               | 0.948 |
| TX                                                                                   | 0.900 | 0.007            | -14.340 | 0.000 | 0.887               | 0.913 |
| UT                                                                                   | 0.877 | 0.010            | -11.850 | 0.000 | 0.858               | 0.896 |
| VA                                                                                   | 0.921 | 0.008            | -9.240  | 0.000 | 0.905               | 0.937 |
| VT                                                                                   | 0.806 | 0.048            | -3.630  | 0.000 | 0.717               | 0.905 |
| WA                                                                                   | 0.845 | 0.015            | -9.210  | 0.000 | 0.816               | 0.876 |
| WI                                                                                   | 0.859 | 0.008            | -15.380 | 0.000 | 0.842               | 0.876 |
| WV                                                                                   | 0.945 | 0.058            | -0.920  | 0.357 | 0.838               | 1.066 |
| WY                                                                                   | 0.886 | 0.036            | -2.980  | 0.003 | 0.818               | 0.959 |
| Unknown/other                                                                        | 0.881 | 0.019            | -5.790  | 0.000 | 0.844               | 0.920 |
|                                                                                      |       |                  |         |       |                     |       |
| race/ethnicity                                                                       |       |                  |         |       |                     |       |
| B                                                                                    | 0.985 | 0.004            | -3.480  | 0.001 | 0.976               | 0.993 |
| H                                                                                    | 0.998 | 0.005            | -0.360  | 0.721 | 0.988               | 1.008 |
| A                                                                                    | 0.931 | 0.022            | -3.050  | 0.002 | 0.890               | 0.975 |
| U                                                                                    | 0.991 | 0.008            | -1.180  | 0.239 | 0.975               | 1.006 |
|                                                                                      |       |                  |         |       |                     |       |

| Outcome: number of overlap days<br>Population: Medicare Advantage long-term episodes | IRR    | Robust Std. Err. | z       | P>z   | [95 Conf. | Interval] |
|--------------------------------------------------------------------------------------|--------|------------------|---------|-------|-----------|-----------|
| elix_chf                                                                             | 0.990  | 0.005            | -1.970  | 0.049 | 0.980     | 1.000     |
| elix_arrhythmia                                                                      | 0.987  | 0.004            | -2.970  | 0.003 | 0.978     | 0.995     |
| elix_valvular                                                                        | 0.996  | 0.007            | -0.530  | 0.597 | 0.983     | 1.010     |
| elix_pulm_circ                                                                       | 0.989  | 0.009            | -1.180  | 0.239 | 0.970     | 1.008     |
| elix_periph_vasc                                                                     | 0.978  | 0.005            | -3.980  | 0.000 | 0.967     | 0.989     |
| elix_htn_uncomp                                                                      | 0.996  | 0.002            | -1.500  | 0.135 | 0.992     | 1.001     |
| elix_htn_comp                                                                        | 1.001  | 0.007            | 0.110   | 0.909 | 0.988     | 1.014     |
| elix_oth_neuro                                                                       | 0.993  | 0.005            | -1.420  | 0.155 | 0.983     | 1.003     |
| elix_chron_pulm                                                                      | 1.010  | 0.003            | 3.110   | 0.002 | 1.004     | 1.016     |
| elix_pep_ulcer                                                                       | 0.990  | 0.014            | -0.730  | 0.466 | 0.963     | 1.017     |
| elix_dm_wo_cc                                                                        | 0.991  | 0.004            | -2.590  | 0.010 | 0.984     | 0.998     |
| elix_dm_w_cc                                                                         | 0.979  | 0.004            | -4.680  | 0.000 | 0.970     | 0.988     |
| elix_paralysis                                                                       | 0.981  | 0.012            | -1.510  | 0.131 | 0.957     | 1.006     |
| elix_renal                                                                           | 0.982  | 0.006            | -3.040  | 0.002 | 0.970     | 0.994     |
| elix_solid_tumor_wo_mets                                                             | 0.990  | 0.017            | -0.560  | 0.578 | 0.957     | 1.025     |
| elix_liver                                                                           | 0.998  | 0.007            | -0.280  | 0.779 | 0.984     | 1.012     |
| elix_met_cancer                                                                      | 1.065  | 0.046            | 1.450   | 0.146 | 0.978     | 1.160     |
| elix_hiv_aids                                                                        | 1.020  | 0.022            | 0.900   | 0.366 | 0.977     | 1.064     |
| elix_rheum_arth_coll                                                                 | 0.974  | 0.006            | -4.470  | 0.000 | 0.963     | 0.985     |
| elix_hypothyroid                                                                     | 0.993  | 0.005            | -1.490  | 0.136 | 0.984     | 1.002     |
| elix_lymphoma                                                                        | 1.035  | 0.041            | 0.870   | 0.384 | 0.958     | 1.117     |
| elix_coagulopathy                                                                    | 0.991  | 0.010            | -0.890  | 0.372 | 0.971     | 1.011     |
| elix_obesity                                                                         | 0.985  | 0.006            | -2.650  | 0.008 | 0.974     | 0.996     |
| elix_weight_loss                                                                     | 0.980  | 0.008            | -2.560  | 0.010 | 0.964     | 0.995     |
| elix_fluid_electrolyte                                                               | 0.991  | 0.005            | -1.940  | 0.052 | 0.982     | 1.000     |
| elix_blood_loss_anemia                                                               | 1.000  | 0.013            | 0.020   | 0.985 | 0.975     | 1.026     |
| elix_deficiency_anemia                                                               | 0.996  | 0.007            | -0.570  | 0.570 | 0.982     | 1.010     |
| elix_alcohol                                                                         | 0.978  | 0.009            | -2.330  | 0.020 | 0.960     | 0.996     |
| elix_drug_abuse                                                                      | 1.002  | 0.006            | 0.410   | 0.685 | 0.991     | 1.014     |
| elix_psychosis                                                                       | 1.009  | 0.007            | 1.450   | 0.148 | 0.997     | 1.022     |
| elix_depression                                                                      | 1.020  | 0.003            | 6.470   | 0.000 | 1.014     | 1.026     |
| less than 6 months prior insurance coverage                                          | 0.994  | 0.005            | -1.150  | 0.250 | 0.984     | 1.004     |
|                                                                                      |        |                  |         |       |           |           |
| female                                                                               | 0.989  | 0.003            | -3.540  | 0.000 | 0.983     | 0.995     |
| age                                                                                  | 0.998  | 0.000            | -13.150 | 0.000 | 0.998     | 0.999     |
| _cons                                                                                | 0.742  | 0.210            | -1.060  | 0.291 | 0.426     | 1.292     |
| ln(op_days)                                                                          | 1.000  | (exposure)       |         |       |           |           |
| /lnalpha                                                                             | -2.412 | 0.018            |         |       | -2.447    | -2.376    |
| alpha                                                                                | 0.090  | 0.002            |         |       | 0.087     | 0.093     |
| Observations: 228,195 person-months contributed by 24,979 individuals                |        |                  |         |       |           |           |

eTable 15. Intensity of Coprescribing Before and After the Guideline Release: Comparing Same Physician Prescribing to Different Physicians Prescribing Opioids and Benzodiazepines

| Coprescribing type                                                                                                                                                                                                                                                                                                                                                                                                                                                      | Population<br>Opioid episode type | Commercially insured                |  |                                     |  | Medicare Advantage                  |  |                                     |  |
|-------------------------------------------------------------------------------------------------------------------------------------------------------------------------------------------------------------------------------------------------------------------------------------------------------------------------------------------------------------------------------------------------------------------------------------------------------------------------|-----------------------------------|-------------------------------------|--|-------------------------------------|--|-------------------------------------|--|-------------------------------------|--|
|                                                                                                                                                                                                                                                                                                                                                                                                                                                                         |                                   | Long-term                           |  | Short-term                          |  | Long-term                           |  | Short-term                          |  |
|                                                                                                                                                                                                                                                                                                                                                                                                                                                                         |                                   | Value (95% CI)                      |  | Value (95% CI)                      |  | Value (95% CI)                      |  | Value (95% CI)                      |  |
| Coprescribing intensity: Percent of opioid days in month with benzodiazepines available                                                                                                                                                                                                                                                                                                                                                                                 |                                   |                                     |  |                                     |  |                                     |  |                                     |  |
| Same physician prescribing opioids and benzodiazepines                                                                                                                                                                                                                                                                                                                                                                                                                  | Before the guideline              | 80.51 (80.04 to 80.99)              |  | 75.09 (74.87 to 75.30)              |  | 84.54 (84.12 to 84.95)              |  | 83.42 (83.20 to 83.64)              |  |
|                                                                                                                                                                                                                                                                                                                                                                                                                                                                         | After the guideline               | 81.39 (80.91 to 81.87)              |  | 75.68 (75.44 to 75.91)              |  | 86.00 (85.67 to 86.33)              |  | 84.31 (84.11 to 84.50)              |  |
| Different physicians prescribing opioids and benzodiazepines                                                                                                                                                                                                                                                                                                                                                                                                            | Before the guideline              | 76.65 (76.02 to 77.27)              |  | 78.34 (78.13 to 78.55)              |  | 81.53 (80.96 to 82.10)              |  | 81.93 (81.67 to 82.19)              |  |
|                                                                                                                                                                                                                                                                                                                                                                                                                                                                         | After the guideline               | 77.45 (76.86 to 78.04)              |  | 78.24 (78.00 to 78.47)              |  | 81.79 (81.33 to 82.26)              |  | 82.24 (82.01 to 82.47)              |  |
| Unknown                                                                                                                                                                                                                                                                                                                                                                                                                                                                 | Before the guideline              | 72.94 (70.79 to 75.08)              |  | 70.74 (70.20 to 71.28)              |  | 79.36 (78.17 to 80.54)              |  | 81.04 (80.44 to 81.64)              |  |
|                                                                                                                                                                                                                                                                                                                                                                                                                                                                         | After the guideline               | 73.73 (71.66 to 75.81)              |  | 70.79 (70.22 to 0.00)               |  | 81.77 (80.99 to 82.55)              |  | 81.58 (81.15 to 82.01)              |  |
| Absolute difference in coprescribing intensity (base level = Different physicians; positive difference indicates group has higher coprescribing intensity than those receiving opioids and benzodiazepines from different physicians)                                                                                                                                                                                                                                   |                                   |                                     |  |                                     |  |                                     |  |                                     |  |
| Same physician prescribing opioids and benzodiazepines                                                                                                                                                                                                                                                                                                                                                                                                                  | Before the guideline              | 3.87 (3.11 to 4.62) <sup>b</sup>    |  | -3.25 (-3.55 to -2.96) <sup>b</sup> |  | 3.01 (2.33 to 3.69) <sup>b</sup>    |  | 1.49 (1.16 to 1.82) <sup>b</sup>    |  |
|                                                                                                                                                                                                                                                                                                                                                                                                                                                                         | After the guideline               | 3.94 (3.20 to 4.69) <sup>b</sup>    |  | -2.56 (-2.88 to -2.23) <sup>b</sup> |  | 4.21 (3.66 to 4.76) <sup>b</sup>    |  | 2.07 (1.77 to 2.37) <sup>b</sup>    |  |
| Unknown                                                                                                                                                                                                                                                                                                                                                                                                                                                                 | Before the guideline              | -3.71 (-5.91 to -1.51) <sup>b</sup> |  | -7.60 (-8.18 to -7.02) <sup>b</sup> |  | -2.17 (-3.46 to -0.89) <sup>b</sup> |  | -0.89 (-1.54 to -0.24) <sup>b</sup> |  |
|                                                                                                                                                                                                                                                                                                                                                                                                                                                                         | After the guideline               | -3.72 (-5.84 to -1.59) <sup>b</sup> |  | -7.44 (-8.06 to -6.83) <sup>b</sup> |  | -0.02 (-0.90 to 0.85)               |  | -0.66 (-1.15 to -0.17) <sup>b</sup> |  |
| Adjusted percentages represent predictive margins from a zero-truncated negative binomial model that included patient age, sex, race/ethnicity, state of residence, and Elixhauser comorbidity flags calculated on a rolling 6 month basis. Separate models were specified for each patient population and episode type (commercial and Medicare Advantage; long-term and short-term). Standard errors in the model were adjusted for clustering on individual patient. |                                   |                                     |  |                                     |  |                                     |  |                                     |  |
| Absolute differences are in percentage points                                                                                                                                                                                                                                                                                                                                                                                                                           |                                   |                                     |  |                                     |  |                                     |  |                                     |  |
| <sup>b</sup> Difference statistically significantly different than 0 after controlling for family-wise error rate of 0.05 within table                                                                                                                                                                                                                                                                                                                                  |                                   |                                     |  |                                     |  |                                     |  |                                     |  |



eTable 16. Extent of Coprescription by Race/Ethnicity: Adjusted Percent of Overlapping Opioids and BZDs in Month

| Race/ethnicity        | White                                 | Black                  | Hispanic               | Asian                  | Unknown/other          |
|-----------------------|---------------------------------------|------------------------|------------------------|------------------------|------------------------|
|                       | Value (95% CI)                        | Value (95% CI)         | Value (95% CI)         | Value (95% CI)         | Value (95% CI)         |
|                       | <b>Long-term opioid use episodes</b>  |                        |                        |                        |                        |
| Study start           | 24.31 (23.62 to 25.01)                | 19.53 (18.01 to 21.04) | 22.08 (20.04 to 24.12) | 19.62 (14.42 to 24.82) | 23.50 (19.40 to 27.61) |
| Just before guideline | 26.33 (25.82 to 26.84)                | 19.47 (18.39 to 20.54) | 24.76 (23.24 to 26.28) | 19.93 (16.19 to 23.67) | 25.84 (22.87 to 28.81) |
| Just after guideline  | 27.07 (26.57 to 27.57)                | 19.01 (18.00 to 20.01) | 23.54 (22.12 to 24.96) | 19.97 (16.50 to 23.43) | 25.70 (23.20 to 28.20) |
| Study end             | 24.71 (24.19 to 25.22)                | 18.12 (17.12 to 19.11) | 23.11 (21.56 to 24.67) | 18.46 (14.35 to 22.57) | 23.19 (21.30 to 25.09) |
|                       | <b>Short-term opioid use episodes</b> |                        |                        |                        |                        |
| Study start           | 11.35 (11.26 to 11.44)                | 7.24 (7.07 to 7.42)    | 9.10 (8.90 to 9.31)    | 6.43 (6.08 to 6.77)    | 10.90 (10.43 to 11.38) |
| Just before guideline | 11.81 (11.72 to 11.90)                | 8.08 (7.90 to 8.27)    | 10.15 (9.93 to 10.37)  | 6.67 (6.33 to 7.02)    | 11.36 (10.88 to 11.83) |
| Just after guideline  | 11.40 (11.31 to 11.49)                | 7.29 (7.12 to 7.45)    | 9.43 (9.21 to 9.64)    | 6.25 (5.88 to 6.62)    | 10.55 (10.18 to 10.92) |
| Study end             | 11.71 (11.61 to 11.81)                | 7.67 (7.49 to 7.85)    | 9.70 (9.47 to 9.93)    | 6.95 (6.51 to 7.39)    | 10.67 (10.38 to 10.97) |

eTable 17. Changes in Extent of Opioid and Benzodiazepine Coprescribing Associated With CDC Guideline Release, by Race/Ethnicity

| Race/ethnicity                            | White                  | Black                  | Hispanic               | Asian                 | Unknown/other          |
|-------------------------------------------|------------------------|------------------------|------------------------|-----------------------|------------------------|
|                                           | Value (95% CI)         | Value (95% CI)         | Value (95% CI)         | Value (95% CI)        | Value (95% CI)         |
| <b>Long-term opioid use episodes</b>      |                        |                        |                        |                       |                        |
| Change in level (percentage points)       | 0.74 (0.26 to 1.22)    | -0.46 (-1.48 to 0.56)  | -1.22 (-2.67 to 0.23)  | 0.04 (-3.61 to 3.69)  | -0.14 (-2.97 to 2.69)  |
| p-value (change in level=0)               | 0.003 <sup>b</sup>     | 0.377                  | 0.100                  | 0.982                 | 0.924                  |
| pre-guideline release slope <sup>a</sup>  | 0.93 (0.50 to 1.36)    | -0.03 (-0.96 to 0.90)  | 1.24 (-0.07 to 2.54)   | 0.14 (-3.11 to 3.40)  | 1.08 (-1.46 to 3.61)   |
| post-guideline release slope <sup>a</sup> | -1.18 (-1.56 to -0.80) | -0.44 (-1.19 to 0.30)  | -0.21 (-1.32 to 0.90)  | -0.76 (-3.65 to 2.14) | -1.26 (-2.99 to 0.48)  |
| p-value (change in slope=0)               | <0.001 <sup>b</sup>    | 0.529                  | 0.128                  | 0.709                 | 0.174                  |
| <b>Short-term opioid use episodes</b>     |                        |                        |                        |                       |                        |
| Change in level (percentage points)       | -0.41 (-0.52 to -0.29) | -0.80 (-1.02 to -0.58) | -0.72 (-1.00 to -0.45) | -0.42 (-0.89 to 0.05) | -0.80 (-1.35 to -0.26) |
| p-value (change in level=0)               | <0.001 <sup>b</sup>    | <0.001 <sup>b</sup>    | <0.001 <sup>b</sup>    | 0.079                 | 0.004                  |
| pre-guideline release slope <sup>a</sup>  | 0.21 (0.15 to 0.28)    | 0.39 (0.26 to 0.52)    | 0.48 (0.33 to 0.64)    | 0.11 (-0.15 to 0.37)  | 0.21 (-0.14 to 0.56)   |
| post-guideline release slope <sup>a</sup> | 0.15 (0.07 to 0.23)    | 0.19 (0.05 to 0.33)    | 0.14 (-0.05 to 0.32)   | 0.35 (0.01 to 0.69)   | 0.06 (-0.22 to 0.34)   |
| p-value (change in slope=0)               | 0.266                  | 0.054                  | 0.006                  | 0.283                 | 0.527                  |

Adjusted rates of overlapping opioid and benzodiazepine fills represent predictive margins from a logit model that included patient age, sex, race/ethnicity, state of residence, and Elixhauser comorbidity flags calculated on a rolling 6 month basis. Adjusted rates of opioid days with benzodiazepines were specified with the same covariates, but were negative binomial models using the number of opioid days in the month as an exposure variable (i.e., the natural log of opioid days was included in the model with the coefficient constrained to be 1). Separate models were specified for each patient population (commercial, Medicare Advantage). Standard errors in the model were adjusted for clustering on individual patient. BZD=benzodiazepine

<sup>a</sup> Slopes given in units of percentage point change per 12 months

<sup>b</sup> Statistically significant after controlling for family-wise error rate of 0.05 within table

eTable 18. Regression Results Secondary Analysis: Race/Ethnicity Short-term Episodes

| Any overlap days<br>Commercial and Medicare | Coef.  | Robust<br>Std. Err. | Z      | P>z   | [95 Conf. | Interval] |
|---------------------------------------------|--------|---------------------|--------|-------|-----------|-----------|
| race/ethnicity by months before release     |        |                     |        |       |           |           |
| White, non-Hispanic                         | 0.002  | 0.000               | 6.360  | 0.000 | 0.001     | 0.002     |
| Black                                       | 0.005  | 0.001               | 5.740  | 0.000 | 0.003     | 0.006     |
| Hispanic, any race                          | 0.005  | 0.001               | 6.070  | 0.000 | 0.003     | 0.006     |
| Asian                                       | 0.002  | 0.002               | 0.860  | 0.390 | -0.002    | 0.005     |
| Unknown/other                               | 0.002  | 0.002               | 1.170  | 0.242 | -0.001    | 0.005     |
| race/ethnicity by months since release      |        |                     |        |       |           |           |
| White, non-Hispanic                         | -0.001 | 0.000               | -1.110 | 0.269 | -0.001    | 0.000     |
| Black                                       | -0.002 | 0.001               | -1.870 | 0.062 | -0.005    | 0.000     |
| Hispanic, any race                          | -0.003 | 0.001               | -2.730 | 0.006 | -0.006    | -0.001    |
| Asian                                       | 0.003  | 0.003               | 1.070  | 0.286 | -0.003    | 0.009     |
| Unknown/other                               | -0.001 | 0.002               | -0.610 | 0.541 | -0.005    | 0.003     |
| state                                       |        |                     |        |       |           |           |
| AL                                          | 0.041  | 0.097               | 0.430  | 0.670 | -0.149    | 0.232     |
| AR                                          | 0.125  | 0.098               | 1.280  | 0.199 | -0.066    | 0.317     |
| AZ                                          | -0.115 | 0.097               | -1.190 | 0.234 | -0.305    | 0.075     |
| CA                                          | -0.103 | 0.097               | -1.060 | 0.289 | -0.292    | 0.087     |
| CO                                          | -0.066 | 0.097               | -0.690 | 0.493 | -0.256    | 0.123     |
| CT                                          | -0.076 | 0.098               | -0.780 | 0.437 | -0.268    | 0.116     |
| DC                                          | -0.358 | 0.105               | -3.420 | 0.001 | -0.564    | -0.153    |
| DE                                          | -0.163 | 0.119               | -1.370 | 0.169 | -0.396    | 0.070     |
| FL                                          | 0.212  | 0.096               | 2.190  | 0.028 | 0.023     | 0.401     |
| GA                                          | -0.066 | 0.097               | -0.680 | 0.497 | -0.255    | 0.124     |
| HI                                          | -0.474 | 0.108               | -4.390 | 0.000 | -0.686    | -0.262    |
| IA                                          | -0.274 | 0.098               | -2.800 | 0.005 | -0.466    | -0.083    |
| ID                                          | -0.471 | 0.102               | -4.620 | 0.000 | -0.670    | -0.271    |
| IL                                          | -0.180 | 0.097               | -1.860 | 0.063 | -0.369    | 0.010     |
| IN                                          | -0.327 | 0.097               | -3.360 | 0.001 | -0.517    | -0.136    |
| KS                                          | -0.219 | 0.099               | -2.210 | 0.027 | -0.412    | -0.025    |
| KY                                          | -0.333 | 0.099               | -3.350 | 0.001 | -0.528    | -0.138    |
| LA                                          | 0.199  | 0.097               | 2.050  | 0.040 | 0.009     | 0.389     |
| MA                                          | -0.111 | 0.098               | -1.130 | 0.260 | -0.303    | 0.082     |
| MD                                          | -0.228 | 0.097               | -2.340 | 0.020 | -0.418    | -0.037    |
| ME                                          | -0.268 | 0.107               | -2.510 | 0.012 | -0.477    | -0.058    |
| MI                                          | -0.035 | 0.098               | -0.360 | 0.722 | -0.227    | 0.157     |
| MN                                          | -0.677 | 0.097               | -6.960 | 0.000 | -0.867    | -0.486    |
| MO                                          | -0.060 | 0.097               | -0.620 | 0.534 | -0.250    | 0.129     |
| MS                                          | -0.135 | 0.098               | -1.370 | 0.169 | -0.328    | 0.058     |
| MT                                          | -0.402 | 0.120               | -3.350 | 0.001 | -0.636    | -0.167    |

| Any overlap days<br>Commercial and Medicare | Coef.  | Robust<br>Std. Err. | Z       | P>z   | [95 Conf. | Interval] |
|---------------------------------------------|--------|---------------------|---------|-------|-----------|-----------|
| NC                                          | 0.094  | 0.097               | 0.980   | 0.329 | -0.095    | 0.284     |
| ND                                          | -0.500 | 0.108               | -4.650  | 0.000 | -0.711    | -0.289    |
| NE                                          | -0.260 | 0.098               | -2.650  | 0.008 | -0.452    | -0.068    |
| NH                                          | 0.043  | 0.104               | 0.410   | 0.680 | -0.161    | 0.247     |
| NJ                                          | -0.061 | 0.097               | -0.620  | 0.532 | -0.251    | 0.130     |
| NM                                          | -0.191 | 0.100               | -1.910  | 0.056 | -0.386    | 0.005     |
| NV                                          | 0.058  | 0.100               | 0.580   | 0.559 | -0.138    | 0.254     |
| NY                                          | -0.382 | 0.097               | -3.930  | 0.000 | -0.572    | -0.192    |
| OH                                          | -0.311 | 0.097               | -3.210  | 0.001 | -0.500    | -0.121    |
| OK                                          | -0.219 | 0.098               | -2.230  | 0.026 | -0.411    | -0.027    |
| OR                                          | -0.443 | 0.098               | -4.500  | 0.000 | -0.636    | -0.250    |
| PA                                          | -0.130 | 0.098               | -1.330  | 0.184 | -0.321    | 0.062     |
| RI                                          | -0.004 | 0.099               | -0.040  | 0.970 | -0.198    | 0.191     |
| SC                                          | 0.129  | 0.097               | 1.330   | 0.184 | -0.062    | 0.320     |
| SD                                          | -0.503 | 0.113               | -4.450  | 0.000 | -0.725    | -0.282    |
| TN                                          | -0.064 | 0.097               | -0.650  | 0.513 | -0.254    | 0.127     |
| TX                                          | -0.142 | 0.096               | -1.480  | 0.139 | -0.331    | 0.046     |
| UT                                          | -0.245 | 0.097               | -2.510  | 0.012 | -0.436    | -0.054    |
| VA                                          | -0.035 | 0.097               | -0.360  | 0.721 | -0.225    | 0.156     |
| VT                                          | -0.356 | 0.120               | -2.970  | 0.003 | -0.590    | -0.121    |
| WA                                          | -0.415 | 0.098               | -4.250  | 0.000 | -0.607    | -0.224    |
| WI                                          | -0.291 | 0.097               | -3.010  | 0.003 | -0.481    | -0.101    |
| WV                                          | -0.129 | 0.109               | -1.190  | 0.235 | -0.343    | 0.084     |
| WY                                          | -0.491 | 0.115               | -4.270  | 0.000 | -0.716    | -0.265    |
| Unknown/other                               | -0.124 | 0.101               | -1.220  | 0.221 | -0.323    | 0.075     |
|                                             |        |                     |         |       |           |           |
| post-guideline (binary) by race/ethnicity   |        |                     |         |       |           |           |
| 0 by B                                      | -2.395 | 0.575               | -4.170  | 0.000 | -3.522    | -1.269    |
| 0 by H                                      | -2.190 | 0.555               | -3.950  | 0.000 | -3.278    | -1.103    |
| 0 by A                                      | -0.505 | 1.237               | -0.410  | 0.683 | -2.930    | 1.919     |
| 0 by U                                      | -0.066 | 1.052               | -0.060  | 0.950 | -2.127    | 1.996     |
| 1 by W                                      | -0.041 | 0.006               | -6.980  | 0.000 | -0.053    | -0.030    |
| 1 by B                                      | -2.511 | 0.583               | -4.310  | 0.000 | -3.654    | -1.369    |
| 1 by H                                      | -2.275 | 0.563               | -4.040  | 0.000 | -3.379    | -1.172    |
| 1 by A                                      | -0.577 | 1.258               | -0.460  | 0.647 | -3.043    | 1.889     |
| 1 by U                                      | -0.151 | 1.070               | -0.140  | 0.888 | -2.248    | 1.945     |
|                                             |        |                     |         |       |           |           |
| age                                         | 0.008  | 0.000               | 50.430  | 0.000 | 0.007     | 0.008     |
| female                                      | 0.416  | 0.004               | 105.190 | 0.000 | 0.408     | 0.424     |
|                                             |        |                     |         |       |           |           |
| beneficiary type                            |        |                     |         |       |           |           |
| Medicare                                    | 0.181  | 0.006               | 28.140  | 0.000 | 0.168     | 0.194     |
|                                             |        |                     |         |       |           |           |

| Any overlap days<br>Commercial and Medicare                                | Coef.  | Robust<br>Std. Err. | Z       | P>z   | [95 Conf. | Interval] |
|----------------------------------------------------------------------------|--------|---------------------|---------|-------|-----------|-----------|
| elix_chf                                                                   | -0.024 | 0.011               | -2.160  | 0.031 | -0.045    | -0.002    |
| elix_arrhythmia                                                            | -0.035 | 0.008               | -4.260  | 0.000 | -0.051    | -0.019    |
| elix_valvular                                                              | -0.070 | 0.013               | -5.520  | 0.000 | -0.095    | -0.045    |
| elix_pulm_circ                                                             | 0.031  | 0.018               | 1.690   | 0.091 | -0.005    | 0.066     |
| elix_periph_vasc                                                           | -0.092 | 0.011               | -8.090  | 0.000 | -0.115    | -0.070    |
| elix_htn_uncomp                                                            | 0.054  | 0.005               | 11.950  | 0.000 | 0.045     | 0.063     |
| elix_htn_comp                                                              | -0.044 | 0.013               | -3.410  | 0.001 | -0.069    | -0.019    |
| elix_oth_neuro                                                             | 0.349  | 0.011               | 31.130  | 0.000 | 0.327     | 0.370     |
| elix_chron_pulm                                                            | 0.337  | 0.007               | 49.420  | 0.000 | 0.324     | 0.351     |
| elix_pep_ulcer                                                             | 0.052  | 0.034               | 1.530   | 0.125 | -0.014    | 0.119     |
| elix_dm_wo_cc                                                              | -0.076 | 0.007               | -11.580 | 0.000 | -0.089    | -0.063    |
| elix_dm_w_cc                                                               | -0.131 | 0.009               | -14.810 | 0.000 | -0.148    | -0.113    |
| elix_paralysis                                                             | 0.027  | 0.028               | 0.990   | 0.322 | -0.027    | 0.081     |
| elix_renal                                                                 | -0.158 | 0.011               | -13.750 | 0.000 | -0.180    | -0.135    |
| elix_solid_tumor_wo_mets                                                   | -0.024 | 0.014               | -1.660  | 0.097 | -0.052    | 0.004     |
| elix_liver                                                                 | 0.121  | 0.016               | 7.770   | 0.000 | 0.090     | 0.151     |
| elix_met_cancer                                                            | -0.041 | 0.057               | -0.720  | 0.473 | -0.153    | 0.071     |
| elix_hiv_aids                                                              | 0.496  | 0.039               | 12.750  | 0.000 | 0.419     | 0.572     |
| elix_rheum_arth_coll                                                       | 0.057  | 0.012               | 4.880   | 0.000 | 0.034     | 0.080     |
| elix_hypothyroid                                                           | 0.129  | 0.008               | 16.770  | 0.000 | 0.114     | 0.145     |
| elix_lymphoma                                                              | 0.047  | 0.048               | 0.990   | 0.324 | -0.047    | 0.141     |
| elix_coagulopathy                                                          | -0.052 | 0.018               | -2.890  | 0.004 | -0.088    | -0.017    |
| elix_obesity                                                               | -0.095 | 0.009               | -10.500 | 0.000 | -0.113    | -0.077    |
| elix_weight_loss                                                           | 0.068  | 0.018               | 3.850   | 0.000 | 0.033     | 0.102     |
| elix_fluid_electrolyte                                                     | 0.064  | 0.010               | 6.760   | 0.000 | 0.046     | 0.083     |
| elix_blood_loss_anemia                                                     | -0.133 | 0.028               | -4.720  | 0.000 | -0.188    | -0.078    |
| elix_deficiency_anemia                                                     | 0.072  | 0.015               | 4.860   | 0.000 | 0.043     | 0.100     |
| elix_alcohol                                                               | 0.160  | 0.019               | 8.320   | 0.000 | 0.122     | 0.198     |
| elix_drug_abuse                                                            | 0.555  | 0.019               | 29.990  | 0.000 | 0.519     | 0.591     |
| elix_psychosis                                                             | 0.607  | 0.018               | 33.130  | 0.000 | 0.571     | 0.643     |
| elix_depression                                                            | 1.178  | 0.006               | 197.920 | 0.000 | 1.166     | 1.189     |
| less than 6 months prior<br>insurance coverage                             | -0.007 | 0.004               | -1.550  | 0.122 | -0.015    | 0.002     |
| _cons                                                                      | -3.988 | 0.211               | -18.900 | 0.000 | -4.402    | -3.575    |
| Observations: 9,741,154 person-months contributed by 4,823,962 individuals |        |                     |         |       |           |           |

eTable 19. Regression Results Secondary Analysis: Race/Ethnicity Long-term Episodes

| Any overlap days<br>Commercial and Medicare<br>long-term episodes | Coef. | Robust<br>Std. Err. | Z     | P>z   | [95 Conf. | Interval] |
|-------------------------------------------------------------------|-------|---------------------|-------|-------|-----------|-----------|
| race/ethnicity by months before release                           |       |                     |       |       |           |           |
| White, non-Hispanic                                               | 0.004 | 0.001               | 4.210 | 0.000 | 0.002     | 0.006     |

| Any overlap days<br>Commercial and Medicare<br>long-term episodes | Coef.  | Robust<br>Std. Err. | Z      | P>z   | [95 Conf. | Interval] |
|-------------------------------------------------------------------|--------|---------------------|--------|-------|-----------|-----------|
| Black                                                             | 0.000  | 0.003               | -0.060 | 0.953 | -0.005    | 0.005     |
| Hispanic, any race                                                | 0.006  | 0.003               | 1.840  | 0.066 | 0.000     | 0.012     |
| Asian                                                             | 0.001  | 0.009               | 0.080  | 0.933 | -0.017    | 0.019     |
| Unknown/other                                                     | 0.005  | 0.006               | 0.830  | 0.409 | -0.007    | 0.017     |
| race/ethnicity by months since release                            |        |                     |        |       |           |           |
| White, non-Hispanic                                               | -0.010 | 0.001               | -6.610 | 0.000 | -0.013    | -0.007    |
| Black                                                             | -0.002 | 0.004               | -0.650 | 0.518 | -0.010    | 0.005     |
| Hispanic, any race                                                | -0.007 | 0.005               | -1.520 | 0.130 | -0.016    | 0.002     |
| Asian                                                             | -0.005 | 0.013               | -0.380 | 0.707 | -0.031    | 0.021     |
| Unknown/other                                                     | -0.011 | 0.008               | -1.360 | 0.174 | -0.027    | 0.005     |
| state                                                             |        |                     |        |       |           |           |
| AL                                                                | 0.919  | 0.419               | 2.190  | 0.028 | 0.097     | 1.740     |
| AR                                                                | 0.823  | 0.421               | 1.960  | 0.050 | -0.001    | 1.647     |
| AZ                                                                | 0.446  | 0.419               | 1.060  | 0.288 | -0.376    | 1.268     |
| CA                                                                | 0.719  | 0.419               | 1.710  | 0.086 | -0.103    | 1.540     |
| CO                                                                | 0.528  | 0.420               | 1.260  | 0.209 | -0.295    | 1.350     |
| CT                                                                | 0.730  | 0.424               | 1.720  | 0.085 | -0.100    | 1.560     |
| DC                                                                | 0.416  | 0.463               | 0.900  | 0.368 | -0.491    | 1.324     |
| DE                                                                | 0.926  | 0.470               | 1.970  | 0.049 | 0.005     | 1.847     |
| FL                                                                | 1.009  | 0.417               | 2.420  | 0.016 | 0.191     | 1.828     |
| GA                                                                | 0.733  | 0.418               | 1.750  | 0.080 | -0.087    | 1.552     |
| HI                                                                | 0.654  | 0.444               | 1.470  | 0.141 | -0.217    | 1.525     |
| IA                                                                | 0.584  | 0.423               | 1.380  | 0.167 | -0.245    | 1.414     |
| ID                                                                | 0.503  | 0.432               | 1.170  | 0.244 | -0.343    | 1.349     |
| IL                                                                | 0.704  | 0.419               | 1.680  | 0.093 | -0.117    | 1.525     |
| IN                                                                | 0.526  | 0.419               | 1.260  | 0.209 | -0.295    | 1.347     |
| KS                                                                | 0.586  | 0.426               | 1.380  | 0.169 | -0.249    | 1.420     |
| KY                                                                | 0.578  | 0.426               | 1.360  | 0.175 | -0.258    | 1.414     |
| LA                                                                | 0.974  | 0.420               | 2.320  | 0.020 | 0.150     | 1.797     |
| MA                                                                | 0.713  | 0.426               | 1.670  | 0.094 | -0.122    | 1.547     |
| MD                                                                | 0.428  | 0.423               | 1.010  | 0.312 | -0.402    | 1.257     |
| ME                                                                | 0.544  | 0.450               | 1.210  | 0.227 | -0.338    | 1.427     |
| MI                                                                | 0.766  | 0.423               | 1.810  | 0.070 | -0.063    | 1.595     |
| MN                                                                | 0.213  | 0.421               | 0.510  | 0.612 | -0.611    | 1.038     |
| MO                                                                | 0.848  | 0.418               | 2.030  | 0.043 | 0.028     | 1.669     |
| MS                                                                | 0.716  | 0.424               | 1.690  | 0.091 | -0.115    | 1.546     |
| MT                                                                | 0.669  | 0.496               | 1.350  | 0.177 | -0.302    | 1.640     |
| NC                                                                | 0.940  | 0.418               | 2.250  | 0.024 | 0.121     | 1.759     |
| ND                                                                | 0.433  | 0.454               | 0.950  | 0.340 | -0.457    | 1.323     |
| NE                                                                | 0.509  | 0.424               | 1.200  | 0.230 | -0.322    | 1.341     |

| Any overlap days<br>Commercial and Medicare<br>long-term episodes | Coef.  | Robust<br>Std. Err. | Z       | P>z   | [95 Conf. | Interval] |
|-------------------------------------------------------------------|--------|---------------------|---------|-------|-----------|-----------|
| NH                                                                | 0.666  | 0.445               | 1.500   | 0.134 | -0.206    | 1.538     |
| NJ                                                                | 0.860  | 0.421               | 2.040   | 0.041 | 0.034     | 1.685     |
| NM                                                                | 0.411  | 0.425               | 0.970   | 0.334 | -0.423    | 1.244     |
| NV                                                                | 0.729  | 0.432               | 1.690   | 0.091 | -0.117    | 1.575     |
| NY                                                                | 0.468  | 0.419               | 1.120   | 0.264 | -0.353    | 1.289     |
| OH                                                                | 0.541  | 0.418               | 1.290   | 0.196 | -0.279    | 1.361     |
| OK                                                                | 0.543  | 0.422               | 1.290   | 0.198 | -0.284    | 1.371     |
| OR                                                                | 0.123  | 0.426               | 0.290   | 0.773 | -0.712    | 0.958     |
| PA                                                                | 0.640  | 0.422               | 1.510   | 0.130 | -0.188    | 1.467     |
| RI                                                                | 0.549  | 0.426               | 1.290   | 0.197 | -0.286    | 1.384     |
| SC                                                                | 0.889  | 0.420               | 2.120   | 0.034 | 0.067     | 1.711     |
| SD                                                                | 0.600  | 0.455               | 1.320   | 0.187 | -0.292    | 1.491     |
| TN                                                                | 0.749  | 0.419               | 1.790   | 0.074 | -0.073    | 1.571     |
| TX                                                                | 0.682  | 0.418               | 1.630   | 0.102 | -0.137    | 1.501     |
| UT                                                                | 0.658  | 0.420               | 1.570   | 0.117 | -0.166    | 1.483     |
| VA                                                                | 0.905  | 0.420               | 2.150   | 0.031 | 0.081     | 1.728     |
| VT                                                                | 0.200  | 0.482               | 0.410   | 0.678 | -0.745    | 1.146     |
| WA                                                                | 0.276  | 0.422               | 0.650   | 0.513 | -0.551    | 1.102     |
| WI                                                                | 0.516  | 0.419               | 1.230   | 0.218 | -0.305    | 1.336     |
| WV                                                                | 0.416  | 0.465               | 0.900   | 0.371 | -0.495    | 1.327     |
| WY                                                                | 0.186  | 0.498               | 0.370   | 0.709 | -0.791    | 1.163     |
| Unknown/other                                                     | 0.762  | 0.429               | 1.780   | 0.076 | -0.079    | 1.604     |
|                                                                   |        |                     |         |       |           |           |
| post-guideline (binary) by race/ethnicity                         |        |                     |         |       |           |           |
| 0 by B                                                            | 2.605  | 1.878               | 1.390   | 0.165 | -1.075    | 6.285     |
| 0 by H                                                            | -1.245 | 2.286               | -0.540  | 0.586 | -5.725    | 3.235     |
| 0 by A                                                            | 2.008  | 6.119               | 0.330   | 0.743 | -9.985    | 14.001    |
| 0 by U                                                            | -0.546 | 4.155               | -0.130  | 0.895 | -8.689    | 7.597     |
| 1 by W                                                            | 0.040  | 0.013               | 3.000   | 0.003 | 0.014     | 0.066     |
| 1 by B                                                            | 2.574  | 1.892               | 1.360   | 0.174 | -1.134    | 6.282     |
| 1 by H                                                            | -1.315 | 2.303               | -0.570  | 0.568 | -5.829    | 3.199     |
| 1 by A                                                            | 2.011  | 6.177               | 0.330   | 0.745 | -10.095   | 14.117    |
| 1 by U                                                            | -0.553 | 4.191               | -0.130  | 0.895 | -8.768    | 7.662     |
|                                                                   |        |                     |         |       |           |           |
| age                                                               | -0.018 | 0.001               | -28.400 | 0.000 | -0.019    | -0.016    |
| female                                                            | 0.428  | 0.015               | 28.660  | 0.000 | 0.399     | 0.458     |
|                                                                   |        |                     |         |       |           |           |
| beneficiary type                                                  |        |                     |         |       |           |           |
| Medicare                                                          | 0.368  | 0.021               | 17.850  | 0.000 | 0.328     | 0.409     |
|                                                                   |        |                     |         |       |           |           |
| elix_chf                                                          | -0.016 | 0.028               | -0.560  | 0.574 | -0.070    | 0.039     |
| elix_arrhythmia                                                   | 0.001  | 0.023               | 0.030   | 0.977 | -0.045    | 0.046     |

| Any overlap days<br>Commercial and Medicare<br>long-term episodes | Coef.  | Robust<br>Std. Err. | Z      | P>z   | [95 Conf. | Interval] |
|-------------------------------------------------------------------|--------|---------------------|--------|-------|-----------|-----------|
| elix_valvular                                                     | -0.019 | 0.036               | -0.540 | 0.592 | -0.089    | 0.051     |
| elix_pulm_circ                                                    | -0.074 | 0.046               | -1.600 | 0.109 | -0.165    | 0.017     |
| elix_periph_vasc                                                  | -0.145 | 0.027               | -5.310 | 0.000 | -0.199    | -0.092    |
| elix_htn_uncomp                                                   | 0.047  | 0.012               | 3.800  | 0.000 | 0.023     | 0.072     |
| elix_htn_comp                                                     | -0.011 | 0.033               | -0.330 | 0.739 | -0.075    | 0.053     |
| elix_oth_neuro                                                    | 0.282  | 0.029               | 9.830  | 0.000 | 0.226     | 0.339     |
| elix_chron_pulm                                                   | 0.315  | 0.018               | 17.330 | 0.000 | 0.279     | 0.351     |
| elix_pep_ulcer                                                    | 0.008  | 0.069               | 0.120  | 0.903 | -0.126    | 0.143     |
| elix_dm_wo_cc                                                     | -0.108 | 0.018               | -5.890 | 0.000 | -0.144    | -0.072    |
| elix_dm_w_cc                                                      | -0.220 | 0.023               | -9.620 | 0.000 | -0.265    | -0.175    |
| elix_paralysis                                                    | 0.013  | 0.061               | 0.220  | 0.825 | -0.106    | 0.133     |
| elix_renal                                                        | -0.170 | 0.029               | -5.780 | 0.000 | -0.227    | -0.112    |
| elix_solid_tumor_wo_mets                                          | -0.070 | 0.078               | -0.900 | 0.370 | -0.223    | 0.083     |
| elix_liver                                                        | 0.128  | 0.038               | 3.400  | 0.001 | 0.054     | 0.201     |
| elix_met_cancer                                                   | -0.313 | 0.248               | -1.260 | 0.206 | -0.798    | 0.172     |
| elix_hiv_aids                                                     | 0.600  | 0.127               | 4.710  | 0.000 | 0.351     | 0.850     |
| elix_rheum_arth_coll                                              | -0.162 | 0.025               | -6.530 | 0.000 | -0.210    | -0.113    |
| elix_hypothyroid                                                  | 0.120  | 0.022               | 5.320  | 0.000 | 0.076     | 0.164     |
| elix_lymphoma                                                     | 0.341  | 0.201               | 1.690  | 0.091 | -0.054    | 0.736     |
| elix_coagulopathy                                                 | 0.005  | 0.047               | 0.100  | 0.924 | -0.088    | 0.097     |
| elix_obesity                                                      | -0.167 | 0.024               | -6.900 | 0.000 | -0.214    | -0.119    |
| elix_weight_loss                                                  | -0.015 | 0.036               | -0.400 | 0.686 | -0.086    | 0.056     |
| elix_fluid_electrolyte                                            | 0.123  | 0.022               | 5.590  | 0.000 | 0.080     | 0.166     |
| elix_blood_loss_anemia                                            | -0.082 | 0.067               | -1.210 | 0.225 | -0.214    | 0.050     |
| elix_deficiency_anemia                                            | 0.023  | 0.037               | 0.610  | 0.543 | -0.050    | 0.095     |
| elix_alcohol                                                      | 0.119  | 0.050               | 2.390  | 0.017 | 0.021     | 0.216     |
| elix_drug_abuse                                                   | 0.187  | 0.029               | 6.390  | 0.000 | 0.130     | 0.245     |
| elix_psychosis                                                    | 0.454  | 0.044               | 10.300 | 0.000 | 0.367     | 0.540     |
| elix_depression                                                   | 0.854  | 0.016               | 52.330 | 0.000 | 0.822     | 0.886     |
| less than 6 months prior<br>insurance coverage                    | -0.085 | 0.017               | -4.980 | 0.000 | -0.119    | -0.052    |
| _cons                                                             | -4.201 | 0.798               | -5.260 | 0.000 | -5.765    | -2.636    |

Observations: 1,624,004 person-months contributed by 128,410 individuals



eTable 20. Extent of Coprescription by Opioid Dose: Adjusted Percent With Overlapping Opioids and Benzodiazepines in Month

| Opioid dose                           | Less than 20 MME per day | 20 to 50 MME           | 50 to 90 MME           | 90 to 120 MME          | 120 or more MME        |
|---------------------------------------|--------------------------|------------------------|------------------------|------------------------|------------------------|
|                                       | Value (95% CI)           | Value (95% CI)         | Value (95% CI)         | Value (95% CI)         | Value (95% CI)         |
| <b>Long-term opioid use episodes</b>  |                          |                        |                        |                        |                        |
| Study start                           | 19.74 (18.86 to 20.61)   | 23.43 (22.63 to 24.23) | 28.94 (27.46 to 30.43) | 32.06 (29.26 to 34.86) | 36.09 (33.26 to 38.91) |
| Just before guideline                 | 20.30 (19.65 to 20.96)   | 24.63 (24.04 to 25.22) | 31.22 (30.11 to 32.33) | 33.43 (31.43 to 35.43) | 37.80 (35.94 to 39.66) |
| Just after guideline                  | 20.79 (20.14 to 21.43)   | 25.11 (24.53 to 25.69) | 31.66 (30.55 to 32.78) | 34.19 (32.18 to 36.19) | 38.42 (36.59 to 40.26) |
| Study end                             | 19.20 (18.55 to 19.86)   | 23.28 (22.68 to 23.89) | 29.25 (28.08 to 30.41) | 30.19 (28.19 to 32.20) | 35.90 (33.83 to 37.96) |
| <b>Short-term opioid use episodes</b> |                          |                        |                        |                        |                        |
| Study start                           | 10.65 (10.48 to 10.81)   | 9.81 (9.72 to 9.90)    | 11.02 (10.87 to 11.18) | 15.32 (14.82 to 15.82) | 17.87 (17.16 to 18.59) |
| Just before guideline                 | 11.22 (11.07 to 11.37)   | 10.41 (10.32 to 10.50) | 11.47 (11.31 to 11.62) | 14.52 (14.06 to 14.98) | 19.69 (18.94 to 20.45) |
| Just after guideline                  | 10.69 (10.54 to 10.84)   | 9.98 (9.89 to 10.07)   | 10.75 (10.58 to 10.92) | 14.34 (13.84 to 14.85) | 19.07 (18.24 to 19.89) |
| Study end                             | 10.75 (10.60 to 10.89)   | 10.20 (10.10 to 10.29) | 11.91 (11.71 to 12.11) | 14.46 (13.93 to 14.99) | 19.60 (18.74 to 20.46) |

eTable 21. Changes in Extent of Opioid and Benzodiazepine Coprescribing Associated With CDC Guideline Release, by Opioid Dose

| Opioid dose                          | Less than 20 MME per day | 20 to 50 MME   | 50 to 90 MME   | 90 to 120 MME  | 120 or more MME |
|--------------------------------------|--------------------------|----------------|----------------|----------------|-----------------|
|                                      | Value (95% CI)           | Value (95% CI) | Value (95% CI) | Value (95% CI) | Value (95% CI)  |
| <b>Long-term opioid use episodes</b> |                          |                |                |                |                 |

| Opioid dose                               | Less than 20 MME per day | 20 to 50 MME           | 50 to 90 MME           | 90 to 120 MME          | 120 or more MME       |
|-------------------------------------------|--------------------------|------------------------|------------------------|------------------------|-----------------------|
|                                           | Value (95% CI)           | Value (95% CI)         | Value (95% CI)         | Value (95% CI)         | Value (95% CI)        |
| Change in level (percentage points)       | 0.48 (-0.19 to 1.16)     | 0.48 (-0.11 to 1.07)   | 0.44 (-0.72 to 1.60)   | 0.76 (-1.39 to 2.90)   | 0.62 (-1.14 to 2.38)  |
| p-value (change in level=0)               | 0.162                    | 0.108                  | 0.460                  | 0.490                  | 0.489                 |
| pre-guideline release slope <sup>a</sup>  | 0.26 (-0.31 to 0.83)     | 0.55 (0.05 to 1.06)    | 1.05 (0.10 to 2.01)    | 0.63 (-1.17 to 2.43)   | 0.79 (-0.91 to 2.49)  |
| post-guideline release slope <sup>a</sup> | -0.79 (-1.29 to -0.29)   | -0.91 (-1.37 to -0.46) | -1.21 (-2.09 to -0.33) | -2.00 (-3.56 to -0.43) | -1.26 (-2.72 to 0.19) |
| p-value (change in slope=0)               | 0.012                    | 0.000 <sup>b</sup>     | 0.002 <sup>b</sup>     | 0.046                  | 0.095                 |
| <b>Short-term opioid use episodes</b>     |                          |                        |                        |                        |                       |
| Change in level (percentage points)       | -0.53 (-0.72 to -0.34)   | -0.43 (-0.55 to -0.32) | -0.71 (-0.94 to -0.49) | -0.17 (-0.84 to 0.49)  | -0.62 (-1.69 to 0.45) |
| p-value (change in level=0)               | 0.000 <sup>b</sup>       | 0.000 <sup>b</sup>     | 0.000 <sup>b</sup>     | 0.604                  | 0.253                 |
| pre-guideline release slope <sup>a</sup>  | 0.27 (0.15 to 0.38)      | 0.28 (0.21 to 0.34)    | 0.20 (0.08 to 0.33)    | -0.37 (-0.74 to 0.00)  | 0.84 (0.27 to 1.41)   |
| post-guideline release slope <sup>a</sup> | 0.03 (-0.10 to 0.15)     | 0.11 (0.03 to 0.19)    | 0.58 (0.42 to 0.74)    | 0.06 (-0.39 to 0.50)   | 0.27 (-0.46 to 0.99)  |
| p-value (change in slope=0)               | 0.008                    | 0.002 <sup>b</sup>     | 0.000 <sup>b</sup>     | 0.154                  | 0.233                 |

Adjusted rates of overlapping opioid and benzodiazepine fills represent predictive margins from a logit model that included patient age, sex, race/ethnicity, state of residence, and Elixhauser comorbidity flags calculated on a rolling 6 month basis. Separate models were specified for each patient population and episode type (commercial and Medicare Advantage; long-term and short-term). Standard errors in the model were adjusted for clustering on individual patient.

<sup>a</sup> Slopes given in units of percentage point change per 12 months

<sup>b</sup> Statistically significant after controlling for family-wise error rate of 0.05 within table

eTable 22. Regression Results Sensitivity Analysis: Episodes Starting Before vs After Guideline Release

| Any overlap in the first 90 days of the episode<br>Commercial and Medicare | Coef.  | Std. Err. | z      | P>z   | [95 Conf. | Interval] |
|----------------------------------------------------------------------------|--------|-----------|--------|-------|-----------|-----------|
| beneficiary type by months before release                                  |        |           |        |       |           |           |
| Commercial                                                                 | -0.002 | 0.002     | -0.990 | 0.321 | -0.005    | 0.002     |
| Medicare                                                                   | 0.001  | 0.002     | 0.550  | 0.584 | -0.002    | 0.004     |
| beneficiary type by months since release                                   |        |           |        |       |           |           |
| Commercial                                                                 | -0.004 | 0.003     | -1.260 | 0.207 | -0.011    | 0.002     |
| Medicare                                                                   | -0.007 | 0.003     | -2.410 | 0.016 | -0.012    | -0.001    |
| state                                                                      |        |           |        |       |           |           |
| AL                                                                         | 0.497  | 0.658     | 0.750  | 0.451 | -0.794    | 1.787     |
| AR                                                                         | 0.424  | 0.659     | 0.640  | 0.520 | -0.868    | 1.717     |
| AZ                                                                         | 0.194  | 0.659     | 0.290  | 0.768 | -1.097    | 1.485     |
| CA                                                                         | 0.356  | 0.658     | 0.540  | 0.588 | -0.934    | 1.647     |
| CO                                                                         | 0.362  | 0.659     | 0.550  | 0.583 | -0.930    | 1.653     |
| CT                                                                         | 0.425  | 0.661     | 0.640  | 0.520 | -0.870    | 1.720     |
| DC                                                                         | 0.157  | 0.682     | 0.230  | 0.818 | -1.179    | 1.493     |
| DE                                                                         | 0.823  | 0.693     | 1.190  | 0.235 | -0.535    | 2.181     |
| FL                                                                         | 0.644  | 0.657     | 0.980  | 0.327 | -0.645    | 1.932     |
| GA                                                                         | 0.387  | 0.658     | 0.590  | 0.556 | -0.902    | 1.676     |
| HI                                                                         | 0.089  | 0.678     | 0.130  | 0.896 | -1.241    | 1.418     |
| IA                                                                         | 0.222  | 0.661     | 0.340  | 0.736 | -1.072    | 1.517     |
| ID                                                                         | 0.059  | 0.665     | 0.090  | 0.930 | -1.244    | 1.361     |
| IL                                                                         | 0.299  | 0.658     | 0.450  | 0.650 | -0.991    | 1.588     |
| IN                                                                         | 0.104  | 0.658     | 0.160  | 0.875 | -1.187    | 1.394     |
| KS                                                                         | 0.162  | 0.664     | 0.240  | 0.807 | -1.138    | 1.463     |
| KY                                                                         | 0.106  | 0.663     | 0.160  | 0.873 | -1.194    | 1.407     |
| LA                                                                         | 0.528  | 0.659     | 0.800  | 0.424 | -0.765    | 1.820     |
| MA                                                                         | 0.397  | 0.663     | 0.600  | 0.550 | -0.902    | 1.696     |
| MD                                                                         | 0.137  | 0.661     | 0.210  | 0.835 | -1.158    | 1.433     |
| ME                                                                         | -0.031 | 0.680     | -0.050 | 0.964 | -1.364    | 1.302     |
| MI                                                                         | 0.414  | 0.661     | 0.630  | 0.532 | -0.883    | 1.710     |
| MN                                                                         | -0.064 | 0.659     | -0.100 | 0.922 | -1.357    | 1.228     |
| MO                                                                         | 0.453  | 0.658     | 0.690  | 0.491 | -0.837    | 1.742     |
| MS                                                                         | 0.220  | 0.663     | 0.330  | 0.740 | -1.079    | 1.519     |
| MT                                                                         | 0.200  | 0.728     | 0.280  | 0.783 | -1.227    | 1.627     |
| NC                                                                         | 0.566  | 0.658     | 0.860  | 0.389 | -0.723    | 1.855     |
| ND                                                                         | 0.295  | 0.681     | 0.430  | 0.665 | -1.039    | 1.629     |
| NE                                                                         | 0.320  | 0.661     | 0.480  | 0.628 | -0.976    | 1.616     |
| NH                                                                         | 0.359  | 0.677     | 0.530  | 0.596 | -0.968    | 1.685     |

| Any overlap in the first 90 days of the episode<br>Commercial and Medicare | Coef.  | Std. Err. | z       | P>z   | [95 Conf. | Interval] |
|----------------------------------------------------------------------------|--------|-----------|---------|-------|-----------|-----------|
| NJ                                                                         | 0.496  | 0.659     | 0.750   | 0.452 | -0.796    | 1.788     |
| NM                                                                         | 0.019  | 0.664     | 0.030   | 0.977 | -1.281    | 1.320     |
| NV                                                                         | 0.246  | 0.666     | 0.370   | 0.713 | -1.061    | 1.552     |
| NY                                                                         | 0.065  | 0.658     | 0.100   | 0.921 | -1.225    | 1.355     |
| OH                                                                         | 0.131  | 0.658     | 0.200   | 0.842 | -1.158    | 1.421     |
| OK                                                                         | 0.059  | 0.661     | 0.090   | 0.929 | -1.238    | 1.355     |
| OR                                                                         | 0.113  | 0.662     | 0.170   | 0.864 | -1.185    | 1.412     |
| PA                                                                         | 0.215  | 0.660     | 0.330   | 0.745 | -1.079    | 1.509     |
| RI                                                                         | 0.226  | 0.663     | 0.340   | 0.734 | -1.074    | 1.525     |
| SC                                                                         | 0.577  | 0.659     | 0.880   | 0.381 | -0.714    | 1.868     |
| SD                                                                         | 0.039  | 0.688     | 0.060   | 0.954 | -1.308    | 1.387     |
| TN                                                                         | 0.334  | 0.659     | 0.510   | 0.612 | -0.956    | 1.625     |
| TX                                                                         | 0.307  | 0.658     | 0.470   | 0.641 | -0.982    | 1.595     |
| UT                                                                         | 0.324  | 0.659     | 0.490   | 0.622 | -0.967    | 1.616     |
| VA                                                                         | 0.436  | 0.659     | 0.660   | 0.508 | -0.856    | 1.728     |
| VT                                                                         | -0.072 | 0.695     | -0.100  | 0.918 | -1.433    | 1.290     |
| WA                                                                         | 0.092  | 0.660     | 0.140   | 0.889 | -1.202    | 1.385     |
| WI                                                                         | 0.217  | 0.658     | 0.330   | 0.742 | -1.073    | 1.507     |
| WV                                                                         | 0.219  | 0.683     | 0.320   | 0.749 | -1.120    | 1.558     |
| WY                                                                         | -0.253 | 0.709     | -0.360  | 0.722 | -1.642    | 1.137     |
| Unknown/other                                                              | 0.466  | 0.681     | 0.680   | 0.494 | -0.869    | 1.802     |
|                                                                            |        |           |         |       |           |           |
| race/ethnicity                                                             |        |           |         |       |           |           |
| B                                                                          | -0.370 | 0.022     | -16.860 | 0.000 | -0.412    | -0.327    |
| H                                                                          | -0.097 | 0.027     | -3.670  | 0.000 | -0.150    | -0.045    |
| A                                                                          | -0.366 | 0.070     | -5.240  | 0.000 | -0.503    | -0.229    |
| U                                                                          | -0.001 | 0.037     | -0.020  | 0.987 | -0.074    | 0.073     |
|                                                                            |        |           |         |       |           |           |
| elix_chf                                                                   | 0.001  | 0.038     | 0.040   | 0.970 | -0.073    | 0.076     |
| elix_arrhythmia                                                            | 0.001  | 0.032     | 0.040   | 0.965 | -0.060    | 0.063     |
| elix_valvular                                                              | -0.034 | 0.051     | -0.660  | 0.510 | -0.134    | 0.067     |
| elix_pulm_circ                                                             | 0.073  | 0.065     | 1.130   | 0.261 | -0.054    | 0.200     |
| elix_periph_vasc                                                           | -0.146 | 0.041     | -3.600  | 0.000 | -0.226    | -0.067    |
| elix_htn_uncomp                                                            | 0.042  | 0.018     | 2.370   | 0.018 | 0.007     | 0.077     |
| elix_htn_comp                                                              | -0.039 | 0.049     | -0.790  | 0.430 | -0.135    | 0.058     |
| elix_oth_neuro                                                             | 0.263  | 0.037     | 7.100   | 0.000 | 0.190     | 0.335     |
| elix_chron_pulm                                                            | 0.297  | 0.025     | 11.870  | 0.000 | 0.248     | 0.346     |
| elix_pep_ulcer                                                             | -0.035 | 0.116     | -0.300  | 0.763 | -0.263    | 0.193     |
| elix_dm_wo_cc                                                              | -0.088 | 0.024     | -3.650  | 0.000 | -0.135    | -0.041    |
| elix_dm_w_cc                                                               | -0.274 | 0.032     | -8.470  | 0.000 | -0.338    | -0.211    |
| elix_paralysis                                                             | -0.072 | 0.077     | -0.940  | 0.350 | -0.223    | 0.079     |
| elix_renal                                                                 | -0.129 | 0.041     | -3.160  | 0.002 | -0.210    | -0.049    |

| Any overlap in the first 90 days of the episode<br>Commercial and Medicare | Coef.  | Std. Err. | z       | P>z   | [95 Conf. | Interval] |
|----------------------------------------------------------------------------|--------|-----------|---------|-------|-----------|-----------|
| elix_solid_tumor_wo_mets                                                   | -0.020 | 0.104     | -0.190  | 0.846 | -0.223    | 0.183     |
| elix_liver                                                                 | 0.089  | 0.058     | 1.540   | 0.124 | -0.024    | 0.203     |
| elix_met_cancer                                                            | 0.278  | 0.353     | 0.790   | 0.432 | -0.415    | 0.971     |
| elix_hiv_aids                                                              | 0.272  | 0.158     | 1.720   | 0.085 | -0.037    | 0.582     |
| elix_rheum_arth_coll                                                       | -0.187 | 0.035     | -5.330  | 0.000 | -0.256    | -0.118    |
| elix_hypothyroid                                                           | 0.147  | 0.032     | 4.610   | 0.000 | 0.085     | 0.210     |
| elix_lymphoma                                                              | 0.551  | 0.297     | 1.850   | 0.064 | -0.031    | 1.134     |
| elix_coagulopathy                                                          | -0.007 | 0.070     | -0.090  | 0.925 | -0.143    | 0.130     |
| elix_obesity                                                               | -0.207 | 0.039     | -5.260  | 0.000 | -0.284    | -0.130    |
| elix_weight_loss                                                           | 0.018  | 0.059     | 0.310   | 0.756 | -0.098    | 0.135     |
| elix_fluid_electrolyte                                                     | 0.133  | 0.036     | 3.650   | 0.000 | 0.062     | 0.205     |
| elix_blood_loss_anemia                                                     | 0.051  | 0.108     | 0.470   | 0.639 | -0.161    | 0.262     |
| elix_deficiency_anemia                                                     | -0.044 | 0.056     | -0.780  | 0.435 | -0.155    | 0.067     |
| elix_alcohol                                                               | 0.073  | 0.070     | 1.050   | 0.293 | -0.063    | 0.210     |
| elix_drug_abuse                                                            | 0.292  | 0.053     | 5.500   | 0.000 | 0.188     | 0.396     |
| elix_psychosis                                                             | 0.407  | 0.055     | 7.400   | 0.000 | 0.299     | 0.514     |
| elix_depression                                                            | 0.851  | 0.024     | 35.580  | 0.000 | 0.805     | 0.898     |
| less than 6 months prior insurance coverage                                | -0.001 | 0.020     | -0.070  | 0.943 | -0.041    | 0.038     |
|                                                                            |        |           |         |       |           |           |
| post-guideline (binary) by beneficiary type                                |        |           |         |       |           |           |
| 0 by Medicare                                                              | -1.464 | 1.599     | -0.920  | 0.360 | -4.598    | 1.670     |
| 1 by com                                                                   | 0.091  | 0.043     | 2.140   | 0.032 | 0.008     | 0.175     |
| 1 by Medicare                                                              | -1.459 | 1.614     | -0.900  | 0.366 | -4.622    | 1.704     |
|                                                                            |        |           |         |       |           |           |
| female                                                                     | 0.442  | 0.015     | 30.270  | 0.000 | 0.414     | 0.471     |
| age                                                                        | -0.018 | 0.001     | -28.140 | 0.000 | -0.019    | -0.017    |
| _cons                                                                      | 0.489  | 1.334     | 0.370   | 0.714 | -2.125    | 3.104     |
| Observations: 109,048 individuals/episodes                                 |        |           |         |       |           |           |

eTable 23. Adjusted Coprescribing Extent Estimates and Trends in Long-term Opioid Use Episodes Starting Before vs After the Guidelines Were Released

|                       | Com                                                                                                                      | MA                        |
|-----------------------|--------------------------------------------------------------------------------------------------------------------------|---------------------------|
|                       | Proportion of long-term opioid use episodes with opioid/benzodiazepine coprescribing in the first 90 days of the episode |                           |
| Study start           | 28.60% (27.58% to 29.62%)                                                                                                | 29.09% (28.11% to 30.07%) |
| Just before guideline | 27.61% (26.60% to 28.62%)                                                                                                | 29.58% (28.61% to 30.54%) |
| Just after guideline  | 29.16% (27.86% to 30.45%)                                                                                                | 29.63% (28.64% to 30.63%) |
| Study end             | 26.95% (25.26% to 28.64%)                                                                                                | 27.06% (25.88% to 28.23%) |
|                       |                                                                                                                          |                           |

|                                                                                                                                                                                                                                                                                                                                                                                                                                                                                                                                                                                                                                                                                                                                  | Com                      | MA                        |
|----------------------------------------------------------------------------------------------------------------------------------------------------------------------------------------------------------------------------------------------------------------------------------------------------------------------------------------------------------------------------------------------------------------------------------------------------------------------------------------------------------------------------------------------------------------------------------------------------------------------------------------------------------------------------------------------------------------------------------|--------------------------|---------------------------|
| Change in level (percentage points)                                                                                                                                                                                                                                                                                                                                                                                                                                                                                                                                                                                                                                                                                              | 1.55% (-0.09 to 3.19)    | 0.06% (-1.34% to 1.45%)   |
| p-value (change in level=0)                                                                                                                                                                                                                                                                                                                                                                                                                                                                                                                                                                                                                                                                                                      | 0.0642                   | 0.9378                    |
| pre-guideline release slope <sup>a</sup>                                                                                                                                                                                                                                                                                                                                                                                                                                                                                                                                                                                                                                                                                         | -0.46% (-1.26% to 0.34%) | 0.22% (-0.54% to 0.99%)   |
| post-guideline release slope <sup>a</sup>                                                                                                                                                                                                                                                                                                                                                                                                                                                                                                                                                                                                                                                                                        | -1.11% (-2.45% to 0.24%) | -1.29% (-2.26% to -0.32%) |
| p-value (change in slope=0)                                                                                                                                                                                                                                                                                                                                                                                                                                                                                                                                                                                                                                                                                                      | 0.415                    | 0.0164                    |
| <p>Adjusted rates of having overlapping opioid and benzodiazepine fills in the first 90 days of an incident long-term opioid use episode represent predictive margins from a logit model that included patient age, sex, race/ethnicity, state of residence, and Elixhauser comorbidity flags calculated on a rolling 6 month basis. The unit of observation was a long-term opioid use episode; episodes were included in the month in which they started. Separate models were specified for each patient population (commercial, Medicare Advantage). Standard errors in the model were adjusted for clustering on individual patient.</p> <p><sup>a</sup> Slopes given in units of percentage point change per 12 months</p> |                          |                           |

eFigure 1. Cohort Flow Chart Describing Construction of the Study Sample

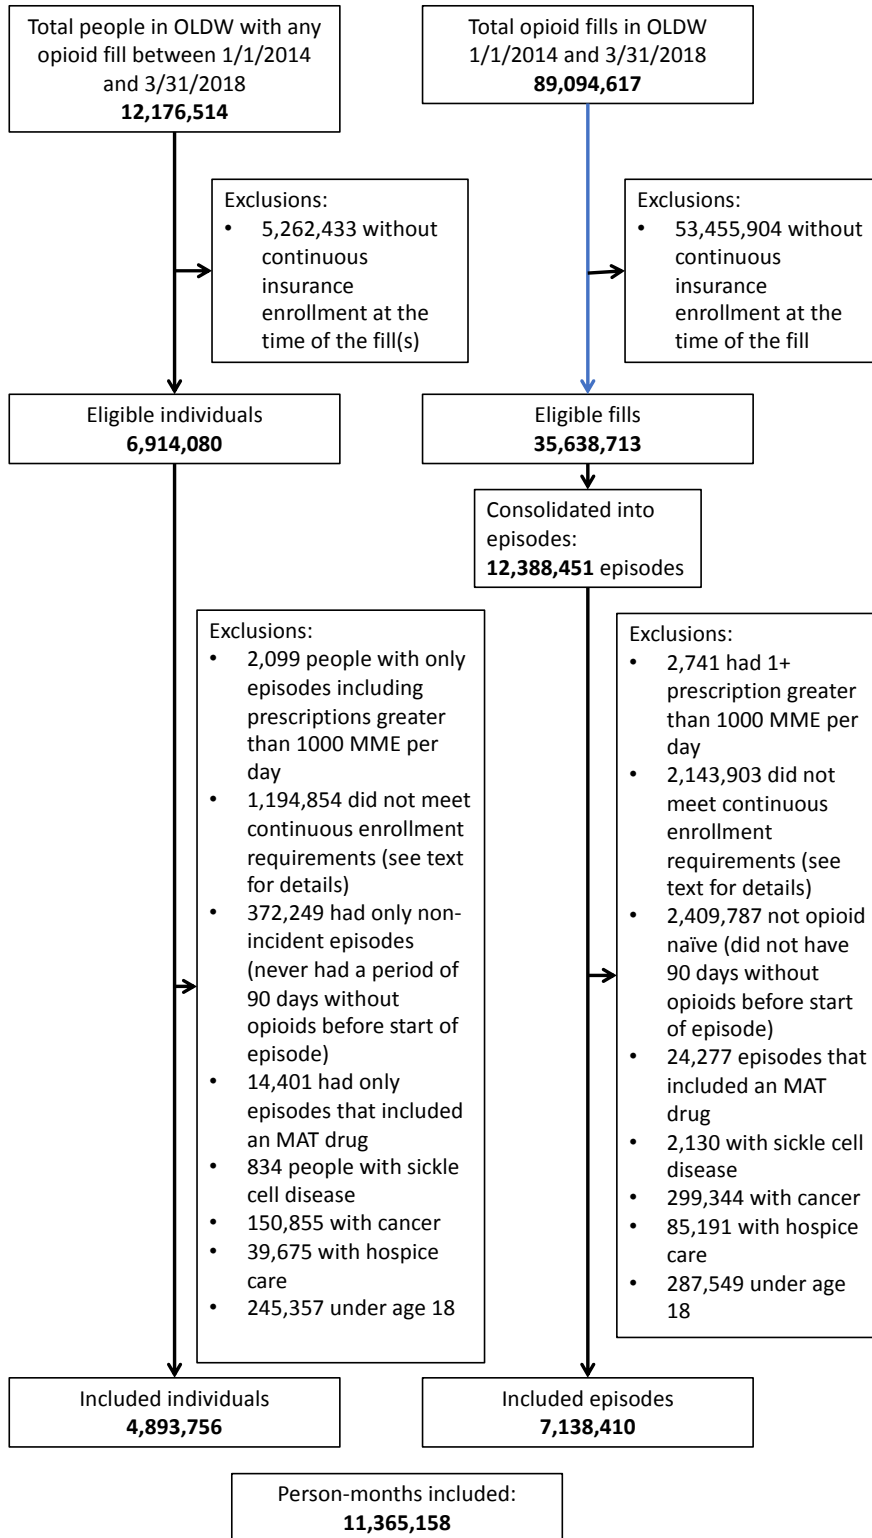

eFigure 2. Race/Ethnicity: Coprescribing Extent

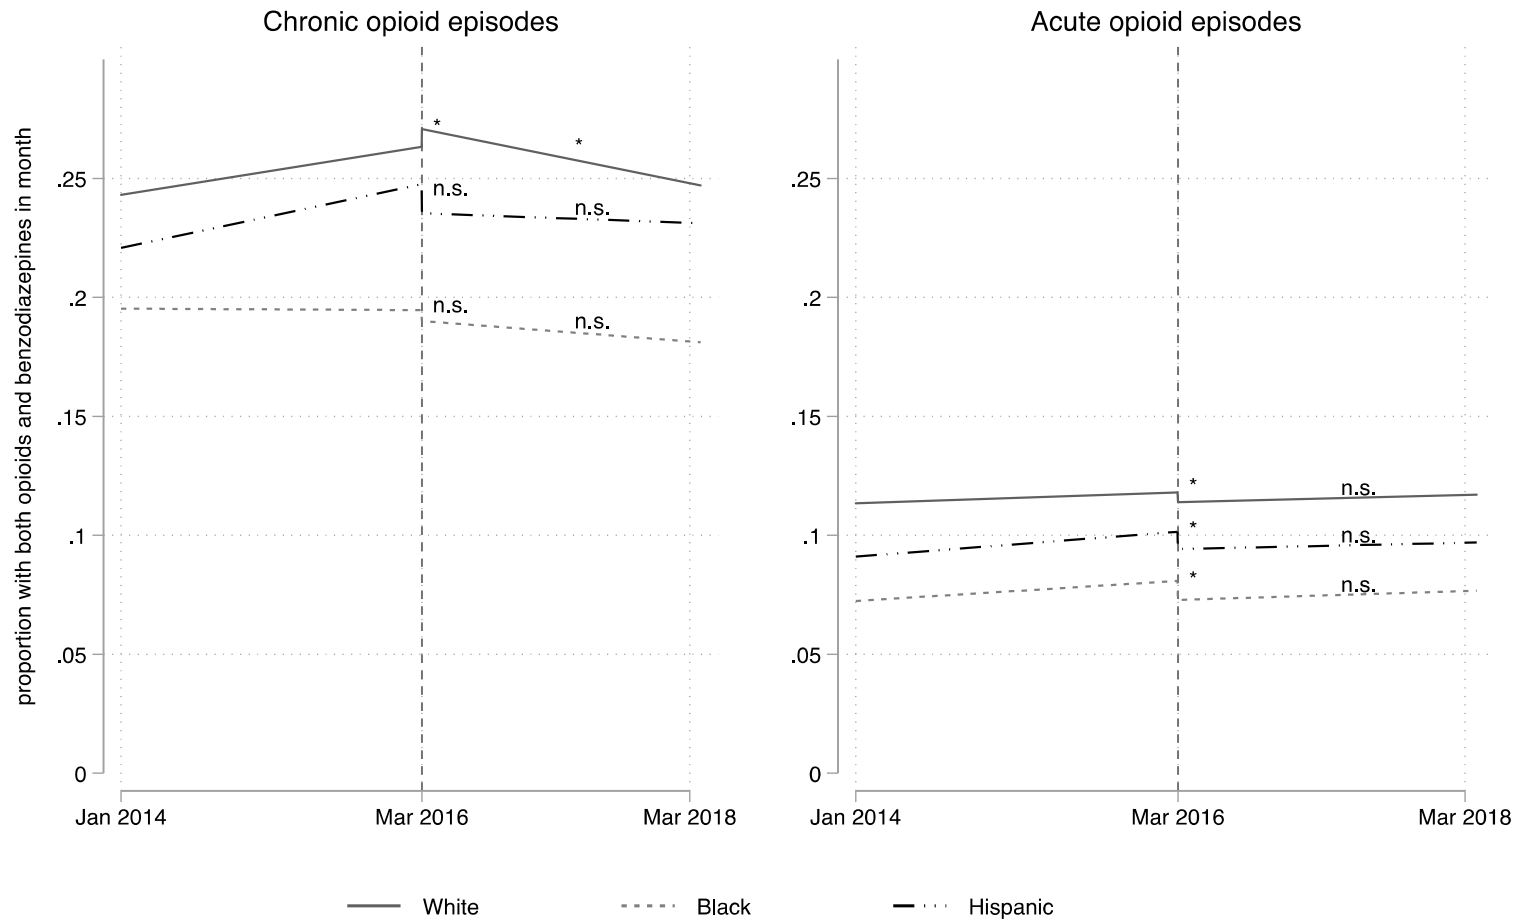

n.s. not statistically significant with family-wise error rate 0.05 across analyses in figure; \* statistically significant at  $p=0.05$ . Statistical significance for change in level indicated next to line demarking release of opioid guidelines. Statistical significance for change in trend (line slope) indicated to the right of the statistical significance of the change in level. The plotplain package was used to display the figure.



eFigure 3. Coprescribing Extent by Opioid Dose

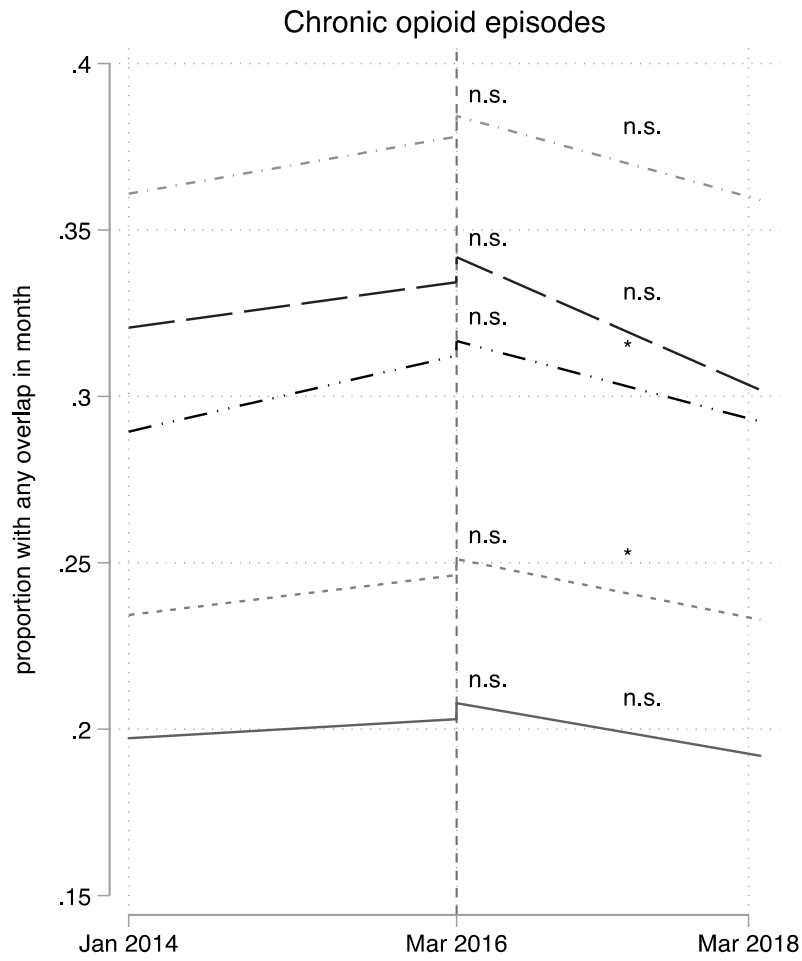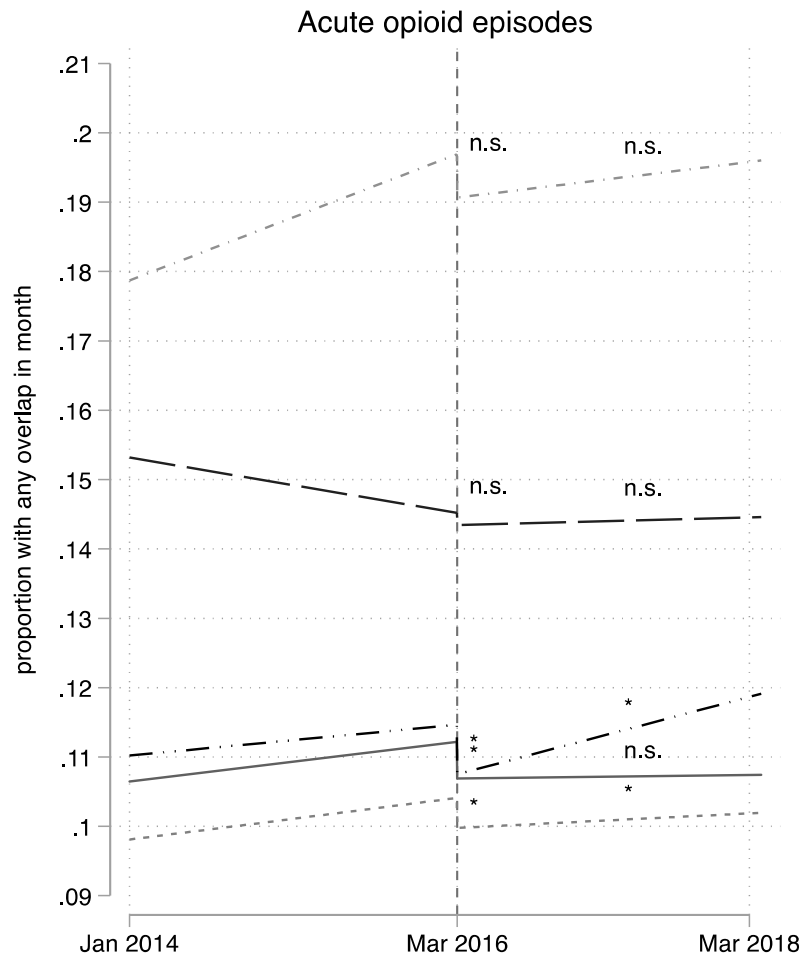

— <20 MME      - - - 20 to 50 MME      - · - 50 to 90 MME

— 90 to 120 MME      - - - >=120 MME

n.s. not statistically significant with family-wise error rate 0.05 across analyses in figure; \* statistically significant at  $p=0.05$ . Statistical significance for change in level indicated next to line demarking release of opioid guidelines. Statistical significance for change in trend (line slope) indicated to the right of the statistical significance of the change in level. The plotplain package was used to display the figure.

## eReferences

1. National Center for Injury Prevention and Control. CDC compilation of opioid analgesic formulations with morphine milligram equivalent conversion factors, 2015 version. 2015; [http://www.pdmpassist.org/pdf/BJA\\_performance\\_measure\\_aid\\_MME\\_conversion.pdf](http://www.pdmpassist.org/pdf/BJA_performance_measure_aid_MME_conversion.pdf).
2. Quan H, Sundararajan V, Halfon P, et al. Coding algorithms for defining comorbidities in ICD-9-CM and ICD-10 administrative data. *Medical care*. 2005;43(11):1130-1139.
3. Holm S. A Simple Sequentially Rejective Multiple Test Procedure. *Scandinavian Journal of Statistics*. 1979;6(2).
4. StataCorp. Stata/MP: Release 15. College Station, TX: StataCorp LLC; 2017.
5. Snyder AB, Lane PA, Zhou M, Paulukonis ST, Hulihan MM. The accuracy of hospital ICD-9-CM codes for determining Sickle Cell Disease genotype. *Journal of rare diseases research & treatment*. 2017;2(4):39-45.
